# Supplementary material
Source: publisher figshare collection journal article supplement (https://acs.figshare.com/ndownloader/files/4386199)

**Regio- and Enantioselective Intermolecular Hydroacylation: Substrate-Directed Addition of Salicylaldehydes to Homoallylic Sulfides**

*Department of Chemistry, University of Toronto, 80 St. George Street,  
Toronto, Ontario, M5S 3H6, Canada*

Matthew M. Coulter, Kevin G. M. Kou, Baye Galligan, and Vy M. Dong\*

\*vdong@chem.utoronto.ca

***Supporting Information***

| <b>Table of Contents:</b>                                      | <b>Page</b> |
|----------------------------------------------------------------|-------------|
| 1. General Considerations                                      | S 2         |
| 2. Preparation of Substrates                                   | S 3         |
| 3. Rh-catalyzed Intermolecular Olefin Hydroacylation           |             |
| (i) Standard Procedures                                        | S12         |
| (ii) Chiral Ligand Screen and Test Reaction with No Added Base | S12         |
| (ii) Substrate Scope                                           | S15         |
| 4. Determination of Enantiomeric Excesses: HPLC analyses       | S28         |
| 5. NMR Spectra                                                 | S48         |

## 1. General Considerations

Commercial reagents were purchased from Sigma Aldrich, Strem or Alfa Aesar and used without further purification. Reactions were monitored using thin-layer chromatography (TLC) on EMD Silica Gel 60 F<sub>254</sub> plates. Visualization of the developed plates was performed under UV light (254 nm) or KMnO<sub>4</sub> stain. Organic solutions were concentrated under reduced pressure on a Büchi rotary evaporator. <sup>1</sup>H and <sup>13</sup>C NMR spectra were recorded on a Varian Mercury 300, Varian Mercury 400, VRX-S (Unity) 400, or Bruker AV-III 400 spectrometer. <sup>1</sup>H NMR spectra were internally referenced to the residual solvent signal or TMS. <sup>13</sup>C NMR spectra were internally referenced to the residual solvent signal. Data for <sup>1</sup>H NMR are reported as follows: chemical shift ( $\delta$  ppm), multiplicity (s = singlet, d = doublet, t = triplet, q = quartet, m = multiplet, br = broad), coupling constant (Hz), integration. Data for <sup>13</sup>C NMR are reported in terms of chemical shift ( $\delta$  ppm).

High resolution mass spectra (HRMS) were obtained on a micromass 70S-250 spectrometer (EI) or an ABI/Sciex QStar Mass Spectrometer (ESI). Infrared (IR) spectra were obtained on a Perkin-Elmer Spectrum 1000 FT-IR Systems and are reported in terms of frequency of absorption (cm<sup>-1</sup>). Melting point ranges were determined on a Fisher-Johns Melting Point Apparatus. Enantiomeric excesses (ee's) were ascertained on an Agilent 1100 Series HPLC. Optical rotations were measured on a Rudolph Research Analytical Autopol IV Automatic Polarimeter. Column chromatography was performed with Silicycle Silia-P Flash Silica Gel, using either glass columns or a Biotage SP-1 system. All salts were purchased from Aldrich and used without purification. Solvents were purchased from Caledon and were purified according to standard procedures.<sup>1</sup> Solvents used in hydroacylations were degassed by three freeze-pump-thaw cycles before being taken into a glove box. Tosylates were synthesized from the corresponding alcohols via standard literature procedures.<sup>2</sup> Chiral ligands were purchased from Strem.

---

<sup>1</sup> Perrin, D. D.; Armarego, W. L. F. *Purification of Laboratory Chemicals*; 5th ed., Pergamon Press, Oxford, 1988.

<sup>2</sup> Ren, X.-F.; Turos, E.; Lake, C. H.; Churchill, M. R. *J. Org. Chem.*, **1995**, *60*, 6468–6483.

## 2. Preparation of Substrates

Salicylaldehydes **1a-1c**, and **1e-1g** are commercially available.

**1d** was synthesized according to a literature procedure.<sup>3</sup>

### 2-hydroxy-6-methylbenzaldehyde (**1h**)

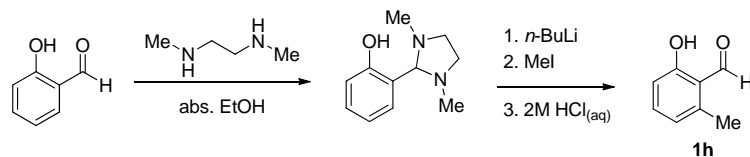

2-Hydroxy-6-methylbenzaldehyde (**1h**) was prepared based on a modified literature procedure according to the scheme above.<sup>4</sup> Salicylaldehyde (1.8 mL, 17 mmol) was dissolved in 93 mL absolute ethanol and *N,N'*-dimethylethylenediamine (2.4 mL, 22.3 mmol) was added dropwise. The reaction immediately became a bright yellow solution which was left to stir at rt for 24 h. Anhydrous MgSO<sub>4</sub> (7.3 g, 61 mmol) was then added to the reaction, which was then stirred for 30 minutes, filtered and concentrated *in vacuo*. The crude imidazolidine was dissolved in 130 mL Et<sub>2</sub>O under argon and TMEDA (10.3 mL, 69.1 mmol) was added. With stirring at rt, a solution of 1.6 M *n*-BuLi in hexanes (43.0 mL, 68.8 mmol) was carefully added over 25 minutes via syringe pump. The resulting yellow solution was left to stir for 5 h and then iodomethane (4.3 mL, 69.1 mmol) was added over 15 minutes via syringe pump. A white solid gradually precipitated from solution and the reaction was left to stir for an additional 12 h. The resulting turbid brown suspension was subsequently poured into 280 mL 2 M HCl<sub>(aq)</sub>, stirred for 1 h and extracted three times with CHCl<sub>3</sub>. The organic layers were combined, washed with brine, dried with anhydrous Na<sub>2</sub>SO<sub>4</sub>, filtered and concentrated *in vacuo*. The title product was isolated by flash column chromatography (0% – 5% ethyl acetate in hexanes) as a yellow liquid (500 mg, 21%). <sup>1</sup>H NMR (400 MHz, CDCl<sub>3</sub>) δ 2.28 (s, 3H), 6.93 (t, *J* = 7.5 Hz, 1H), 7.36-7.44 (m, 2H), 9.88 (s, 1H), 11.27 (s, 1H); <sup>13</sup>C NMR (100 MHz, CDCl<sub>3</sub>) δ 15.2, 119.5, 120.2, 127.0, 131.5, 138.0, 160.1, 196.9; IR (neat): 2921, 2851, 2739, 1656, 1642, 1618, 1482, 1436, 1383, 1317, 1269, 1247, 1217, 1084, 1024, 954, 844, 744, 698. HRMS (EI) Calcd. for [C<sub>8</sub>H<sub>8</sub>O<sub>2</sub>]<sup>+</sup> 136.0524, found 136.0525.

**2a-g**, **5** and **6** were prepared via alkylation of thiophenol derivatives according to the following scheme:

<sup>3</sup> Phan, D. H. T.; Kim, B.; Dong, V. M. *J. Am. Chem. Soc.* **2009**, *131*, 15608.

<sup>4</sup> Parsons, P. J.; Gray, M. *Synlett* **1991**, *10*, 729.

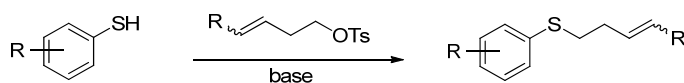

Alkylations using 1,8-diazabicyclo[5.4.0]undec-7-ene (DBU) were performed according to a modified literature procedure.<sup>5</sup>

### but-3-en-1-yl(phenyl)sulfane (2a)

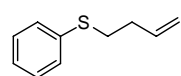

In a flame dried flask equipped under argon, 1.0 ml thiophenol (9.8 mmol, 1.0 equiv) was dissolved in 45 mL dimethylformamide and cooled to 0 °C. 587 mg (14.7 mmol, 1.5) equiv of NaH (available as a 60 % oil dispersion) was added and the slurry was allowed to stir for 5 min. *O*-tosyl-3-butene-1-ol (1.1 equiv) was then added via syringe. The reaction was allowed to warm to room temperature over 16 h, at which point full conversion was observed by TLC analysis. The reaction mixture was cooled to 0 °C, carefully quenched via the dropwise addition of H<sub>2</sub>O, then diluted with ~ 450 mL H<sub>2</sub>O. The aqueous phase was extracted three times with diethyl ether. The combined organics were washed with brine, dried over anhydrous Na<sub>2</sub>SO<sub>4</sub>, filtered, and concentrated to dryness *in vacuo*. **2a** was isolated as a clear oil (1.6 g, quant.) by flash column chromatography in pentane. <sup>1</sup>H NMR (400 MHz, CDCl<sub>3</sub>) δ 2.40-2.43 (m, 2H), 2.99 (t, *J* = 7.5 Hz, 2H), 5.05-5.12 (m, 2H), 5.86 (ddt, *J* = 16.9, 10.2, 6.6 Hz, 1H), 7.16-7.20 (m, 1H), 7.27-7.31 (m, 2H), 7.33-7.35 (m, 2H). <sup>13</sup>C NMR (100 MHz, CDCl<sub>3</sub>) δ 33.2, 33.5, 116.4, 126.1, 129.0, 129.4, 136.5, 136.6; IR (neat): 3075, 3002, 2972, 2926, 1639, 1584, 1480, 1438, 1279, 1092, 1025, 993, 915, 738, 691 cm<sup>-1</sup>; HRMS (EI) Calcd. for [C<sub>10</sub>H<sub>12</sub>S]<sup>+</sup> 164.0660, found 164.0660.

### but-3-en-1-yl(naphthalen-1-yl)sulfane (2b)

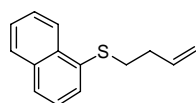

To a flask equipped with a stirbar was added naphthalene-1-thiol (321 mg, 2.0 mmol) in 4 ml toluene. The flask was purged with and maintained under argon, then cooled to 0 °C. 1,8-Diazabicyclo[5.4.0]undec-7-ene (DBU, 329 μL, 2.2 mmol) was added via syringe. *O*-tosyl-3-butene-1-ol was added in 2 ml toluene via syringe. The reaction was stirred for 2.5 h, at which point complete conversion was observed via TLC analysis. The crude reaction

<sup>5</sup> Ono, N.; Miyake, H.; Saito, T.; Kaji, A. *Synthesis-Stuttgart* **1980**, 95

mixture was diluted with diethyl ether and washed three times with aqueous NaOH (1 M). The separated aqueous phase was extracted with diethyl ether and the combined organics were washed twice with brine, dried over  $\text{MgSO}_4$ , filtered, and concentrated *in vacuo*. The crude reaction mixture was flashed through Si gel (hexanes:ethyl acetate) and the product was concentrated to dryness. The product was further purified via reduction of residual contaminating disulfide according to the procedure below.

To a flame dried flask under argon was added 13.1 mg  $\text{LiAlH}_4$  (10 eq. to disulfide according to crude  $^1\text{H}$  NMR analysis) and 2.5 mL tetrahydrofuran. The substrate was then dissolved in 2.5 mL tetrahydrofuran and carefully added dropwise via syringe. The reaction mixture was heated at reflux for 19 h, at which point complete reaction was observed via TLC. The reaction mixture was then cooled to 0 °C and quenched via the dropwise addition of 5 mL aqueous NaOH (1 M), then diluted with diethyl ether. The organics were washed repeatedly with NaOH (1 M), then brine, dried over anhydrous  $\text{Na}_2\text{SO}_4$ , filtered and concentrated *in vacuo*. The desired product was isolated via flash chromatography (hexanes/ethyl acetate) as a yellow oil (282 mg, 51 %).  $^1\text{H}$  NMR (300 MHz,  $\text{CDCl}_3$ )  $\delta$  2.37-2.44 (m, 2H), 3.04 (t,  $J$  = 7.5 Hz, 2H), 5.04-5.12 (m, 2H), 5.87 (ddt,  $J$  = 16.9, 10.2, 6.6 Hz, 1H), 7.39-7.60 (m, 4H), 7.74 (d,  $J$  = 8.2 Hz, 1H), 7.83-7.87 (m, 1H), 8.42 (d,  $J$  = 8.2 Hz, 1H);  $^{13}\text{C}$  NMR (75 MHz,  $\text{CDCl}_3$ )  $\delta$  33.6, 33.8, 116.4, 125.3, 125.7, 126.3, 126.5, 127.4, 128.5, 128.7, 133.2, 133.7, 134.1, 136.6; IR (neat): 3052, 1639, 1564, 1503, 1433, 1382, 1255, 1201, 993, 976, 915, 788, 770, 666  $\text{cm}^{-1}$ ; HRMS (EI) Calcd. for  $[\text{C}_{14}\text{H}_{14}\text{S}]^+$  214.0816, found 214.0815.

#### but-3-en-1-yl(naphthalen-2-yl)sulfane (2c)

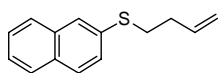

To a flask equipped with a stirbar was added naphthalene-2-thiol (644 mg, 4.0 mmol) in 6 mL benzene. The flask was purged with and maintained under argon, then cooled to 0 °C. 1,8-Diazabicyclo[5.4.0]undec-7-ene (DBU, 650  $\mu\text{L}$ , 4.34 mmol) was added via syringe. The color of the solution changed from clear to yellow. *O*-tosyl-3-butene-1-ol was added in 4 mL benzene via syringe. The reaction was stirred for 2.5 h, at which point complete conversion was observed via TLC analysis. The crude reaction mixture was diluted with diethyl ether and water. The separated organics were washed three times with aqueous NaOH (1 M), water and brine, then dried over anhydrous  $\text{Na}_2\text{SO}_4$ , filtered, and concentrated *in vacuo*. The crude reaction mixture was flashed through a plug of Si gel

(pentane) and the product was concentrated to dryness. Contaminating disulfide was removed as a solid via precipitation with hexanes. The desired product was further purified via reduction of residual contaminating disulfide according to the procedure below.

To a flame dried flask under argon was added 8.0 mg  $\text{LiAlH}_4$  (7 equiv. to disulfide according to  $^1\text{H}$  NMR analysis) and 2.5 mL tetrahydrofuran. The substrate was then dissolved in 2.5 mL tetrahydrofuran and carefully added dropwise via syringe. The reaction mixture was heated at reflux for 5 h, at which point completion of the reaction was observed via TLC. The reaction was then cooled to  $0^\circ\text{C}$  and quenched via the dropwise addition of 5 mL aqueous  $\text{NaOH}$  (1 M). The reaction mixture was diluted with diethyl ether and the separated organics were washed repeatedly with  $\text{NaOH}$  (1 M), then brine. The combined organics were dried over anhydrous  $\text{Na}_2\text{SO}_4$ , filtered and concentrated *in vacuo*. The desired product was isolated via flash chromatography (hexanes/ethyl acetate) as a clear oil (857 mg, 25 %).  $^1\text{H}$  NMR (400 MHz,  $\text{CDCl}_3$ )  $\delta$  2.42-2.48 (m, 2H), 3.09 (t,  $J = 7.5$  Hz, 2H), 5.06-5.10 (m, 2H), 5.89 (ddt,  $J = 16.9$ , 10.2, 6.6 Hz, 1H), 7.45-7.49 (m, 3H), 7.77-7.80 (m, 4H);  $^{13}\text{C}$  NMR (100 MHz,  $\text{CDCl}_3$ )  $\delta$  33.1, 33.5, 116.5, 125.7, 126.7, 127.0, 127.2, 127.6, 127.8, 128.5, 131.9, 133.9, 134.1, 136.5; IR (neat): 3052, 1625, 1589, 1501, 1431, 1338, 1280, 1133, 1069, 993, 943, 916, 851, 811, 743  $\text{cm}^{-1}$ ; HRMS (EI) Calcd. for  $[\text{C}_{14}\text{H}_{14}\text{S}]^+$  214.0816, found 214.0812.

#### methyl 2-(but-3-en-1-ylthio)benzoate (2d)

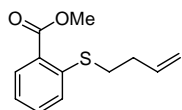

To a flame dried flask equipped with a stirbar was added methyl thiosalicylate (657 mg, 3.9 mmol) in 10 mL acetone, then  $\text{K}_2\text{CO}_3$  (809 mg, 5.9 mmol). *O*-tosyl-3-butene-1-ol (930 mg, 4.1 mmol) in 10 mL acetone was then added via syringe. The reaction was stirred at room temperature for 21 h, at which point full conversion was observed via TLC analysis. Acetone was removed under reduced pressure and the crude reaction mixture was diluted with diethyl ether and water. The separated aqueous phase was extracted an additional two times with diethyl ether. The combined organics were washed with brine, dried over anhydrous  $\text{Na}_2\text{SO}_4$ , filtered and concentrated *in vacuo*. The desired product was isolated via flash chromatography (hexanes/ethyl acetate) as a clear oil (540 mg, 62 %).  $^1\text{H}$  NMR (300 MHz,  $\text{CDCl}_3$ )  $\delta$  2.44-2.51 (m, 2H), 3.00 (t,  $J = 7.6$  Hz, 2H), 3.91 (s, 3H), 5.05-5.18 (m, 2H), 5.91 (ddt,  $J = 16.9$ , 10.2, 6.6 Hz, 1H), 7.13-7.18 (m, 1H), 7.32 (d,  $J = 7.6$  Hz, 1H), 7.41-7.47 (m, 1H), 7.96 (dd,  $J = 8.2$ , 1.5 Hz, 1H);  $^{13}\text{C}$  NMR (75 MHz,  $\text{CDCl}_3$ )  $\delta$  31.6, 32.5, 52.2, 116.5, 124.0, 125.7,

127.9, 131.4, 132.4, 136.4, 141.9, 167.1; IR (neat): 2950, 1714, 1640, 1588, 1562, 1463, 1433, 1272, 1247, 1189, 1144, 1108, 1062, 1046, 993, 963, 916, 824, 743, 714, 693, 655  $\text{cm}^{-1}$ ; HRMS (EI) Calcd. for  $[\text{C}_{12}\text{H}_{14}\text{O}_2\text{S}]^+$  222.0715, found 222.0719.

### but-3-en-1-yl(4-chlorophenyl)sulfane (2e)

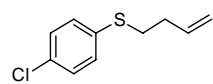

4-Chlorothiophenol was prepared based on a modified literature procedure.<sup>6</sup> Bis(4-chlorophenyl)disulfide (574 mg, 2.0 mmol) and sodium borohydride (190 mg, 5.0 mmol) were suspended in tetrahydrofuran in a flame-dried round bottom flask equipped with a reflux condenser under argon. The reaction mixture was heated to 75 °C and anhydrous methanol (800  $\mu\text{L}$ , 20 mmol) was added via syringe pump over 1 h. The resulting solution was heated at reflux for 4 h, then cooled to rt and quenched by subsequent addition of 1 M HCl (4 mL) and 6 M HCl (6 mL) and extracted three times with dichloromethane. The organic layers were combined, washed with brine, dried over anhydrous  $\text{Na}_2\text{SO}_4$ , filtered and concentrated *in vacuo* to give the crude 4-chlorothiophenol. The isolated product was dissolved in 17.5 mL dimethylformamide in a flame-dried round bottom flask under argon and cooled to 0°C. Sodium hydride (60% oil dispersion, 231 mg, 5.78 mmol) was added to the cooled solution. After stirring for 5 minutes *O*-tosyl-3-butene-1-ol (955 mg, 4.22 mmol) was added. The turbid yellow reaction mixture was allowed to gradually warm to rt over 12 h, then diluted with 150 mL  $\text{H}_2\text{O}$  and extracted three times with diethyl ether. The combined organic layers were washed with brine, dried over anhydrous  $\text{Na}_2\text{SO}_4$ , filtered and concentrated *in vacuo*. The title product was isolated via flash column chromatography (0% – 4% ethyl acetate in hexanes) as a pale yellow liquid (652 mg, 85%).  $^1\text{H}$  NMR (400 MHz,  $\text{CDCl}_3$ )  $\delta$  2.32-2.42 (m, 2H), 2.95 (t,  $J$  = 7.4 Hz, 2H), 5.03-5.13 (m, 2H), 5.83 (ddt,  $J$  = 16.9, 10.2, 6.6 Hz, 1H), 7.26 (s, 4H);  $^{13}\text{C}$  NMR (100 MHz,  $\text{CDCl}_3$ )  $\delta$  33.36, 33.42, 116.6, 129.1, 130.8, 132.1, 135.1, 136.3; IR (neat): 3073, 2972, 2952, 2927, 1640, 1474, 1435, 1389, 1279, 1222, 1095, 1011, 993, 916, 810. HRMS (EI) Calcd. for  $[\text{C}_{10}\text{H}_{11}\text{SCl}]^+$  198.0270, found 198.0269.

### but-3-en-1-yl(4-methoxyphenyl)sulfane (2f)

<sup>6</sup> Ookawa, A.; Yokoyama, S.; Soai, K. *Synth. Commun.* **1986**, *16*, 819.

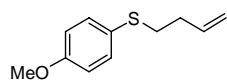

To a flame-dried round bottom flask was added lithium aluminum hydride (146 mg, 3.9 mmol) and 5 mL tetrahydrofuran. The reaction mixture was maintained under argon. Bis(4-methoxyphenyl) disulfide (1.00 g, 3.6 mmol) in 5 mL tetrahydrofuran was added dropwise over a period of 20 minutes. The reaction was heated at reflux for 4 h, then at room temperature for 23 h. The reaction was then cooled to 0 °C and quenched via the dropwise addition of wet ethyl acetate and acidified via the dropwise addition of H<sub>2</sub>SO<sub>4</sub> (2 M). The reaction was then diluted with diethyl ether and filtered through a plug of celite. The organics were washed with water and the separated aqueous phase was extracted three times with diethyl ether. The combined organics were washed with brine, dried over anhydrous Na<sub>2</sub>SO<sub>4</sub>, filtered and concentrated *in vacuo*. The crude 4-methoxythiophenol product was then dissolved in 30 mL toluene and added to a flame-dried flask under argon. *O*-tosyl-3-butene-1-ol (1.78 g, 7.8 mmol) was added via syringe, followed by 1,8-diazabicyclo[5.4.0]undec-7-ene (DBU, 1.1 mL, 7.4 mmol). The reaction was stirred at room temperature for 20 h then diluted with diethyl ether. The organics were washed with NaOH (1 M), water, and brine, then dried over anhydrous Na<sub>2</sub>SO<sub>4</sub>, filtered and concentrated *in vacuo*. The desired product was isolated via flash chromatography (0 – 10% ethyl acetate in hexanes) as a clear oil (325 mg, 23 %). <sup>1</sup>H NMR (300 MHz, CDCl<sub>3</sub>) δ 2.29-2.36 (m, 2H), 2.88 (t, *J* = 7.5 Hz, 2H), 3.80 (s, 3H), 5.02-5.09 (m, 2H), 5.83 (ddt, *J* = 16.9, 10.2, 6.6 Hz, 1H), 6.85 (d, *J* = 8.7 Hz, 1H), 7.36 (d, *J* = 8.8 Hz, 1H); <sup>13</sup>C NMR (75 MHz, CDCl<sub>3</sub>) δ 33.7, 35.3, 55.5, 114.7, 116.2, 126.5, 133.5, 136.7, 159.1; IR (neat): 2920, 2835, 1639, 1592, 1493, 1462, 1440, 1284, 1244, 1173, 1103, 1032, 995, 916, 826 cm<sup>-1</sup>; HRMS (EI) Calcd. for [C<sub>11</sub>H<sub>14</sub>OS]<sup>+</sup> 194.0765, found 194.0767.

### but-3-en-1-yl(cyclohexyl)sulfane (2g)

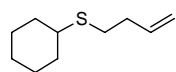

Cyclohexanethiol (320 μL, 2.62 mmol) was dissolved in 12 mL dimethylformamide in a flame-dried round bottom flask under argon. The reaction was cooled to 0 °C and sodium hydride (60% oil dispersion, 157 mg, 3.92 mmol) was added. After stirring at 0 °C for 5 minutes, *O*-tosyl-3-butene-1-ol (637 mg, 2.81 mmol) was added and the reaction was allowed to slowly warm to rt and stirred for 20 h. The resulting reaction mixture was diluted with 100 mL H<sub>2</sub>O and extracted three times with diethyl ether. The combined organic layers were washed with brine, dried over anhydrous Na<sub>2</sub>SO<sub>4</sub>, filtered and concentrated *in vacuo*. The title product was isolated by flash column chromatography (0 – 10%



ethyl acetate in hexanes) as a clear, colorless oil (442 mg, quant.).  $^1\text{H}$  NMR (400 MHz,  $\text{CDCl}_3$ )  $\delta$  1.18-1.40 (m, 5H), 1.57-1.67 (m, 1H), 1.70-1.85 (m, 2H), 1.90-2.02 (m, 2H), 2.28-2.37 (m, 2H), 2.60 (t,  $J = 7.5$  Hz, 2H), 2.63-2.70 (m, 1H), 5.02 (dd,  $J = 10.2, 1.3$  Hz, 1H), 5.04-5.12 (m, 1H), 5.84 (tdd,  $J = 16.9, 10.2, 6.6$  Hz, 1H);  $^{13}\text{C}$  NMR (100 MHz,  $\text{CDCl}_3$ )  $\delta$  26.0, 26.3, 29.6, 33.9, 34.4, 43.7, 115.8, 137.2; IR (neat): 2927, 2852, 1640, 1448, 1279, 1265, 1202, 996, 913, 887. HRMS (EI) Calcd. for  $[\text{C}_{10}\text{H}_{18}\text{S}]^+$  170.1129, found 170.1127.

### 2-allyl-1,3-dithiane (2h)

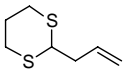 **2h** was prepared by a modified literature procedure.<sup>7</sup> To a flame-dried flask, under argon, 1,3-dithiane (0.24 g, 2 mmol) was added and dissolved in anhydrous tetrahydrofuran and cooled to  $-20$  °C. A solution of 1.21 M *n*-butyllithium in hexanes (2.5 mL, 3.0 mmol) was added dropwise. The mixture was allowed to stir for 40 minutes, after which time it was cooled to  $-60$  °C and allyl bromide (0.35 mL, 4.0 mmol) was added dropwise via syringe. The resulting colorless solution was allowed to warm to room temperature over 5 h, and was subsequently quenched with saturated  $\text{NH}_4\text{Cl}$  solution. This crude mixture was extracted three times with diethyl ether, and the organic layers were dried over anhydrous  $\text{MgSO}_4$ , filtered and concentrated *in vacuo*. Purification via flash column chromatography (ethyl acetate/pentane) afforded **2h** as a colorless oil (39 mg, 12%) with 96% purity by  $^1\text{H}$  NMR analysis.  $^1\text{H}$  NMR (300 MHz,  $\text{CDCl}_3$ )  $\delta$  1.78-1.92 (m, 1H), 2.07-2.16 (m, 1H), 2.51(td,  $J = 7.0, 0.9$  Hz, 2H), 2.78-2.94 (m, 4H), 4.10 (t,  $J = 6.9$  Hz, 1H), 5.11-5.18 (m, 2H), 5.79-5.93 (m, 1H);  $^{13}\text{C}$  NMR (100 MHz,  $\text{CDCl}_3$ )  $\delta$  25.892, 30.592, 39.867, 47.171, 118.095, 133.855; IR (neat): 2896, 1639, 1422, 1276, 1242, 1181, 990, 917, 772, 670  $\text{cm}^{-1}$ ; HRMS (EI) Calcd. for  $[\text{C}_7\text{H}_{12}\text{S}_2]^+$  160.0380, found 160.0381.

### But-3-ene-1,1-diylbis(phenylsulfane) (2i)

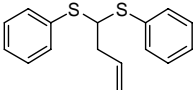 **2i** was prepared by a modified literature procedure.<sup>7</sup> To a flame-dried flask, under argon, bis(phenylthio)methane (1.3 g, 5.5 mmol) was added and dissolved in anhydrous tetrahydrofuran and cooled to  $-30$  °C. A solution of 1.47 M *n*-butyllithium in hexanes (5.6 mL, 8.25 mmol) was added dropwise, producing a pale yellow solution. After cooling to  $-60$  °C, allyl bromide (0.95 mL, 11.0 mmol) was added dropwise via

<sup>7</sup> Karlson, S.; Högberg, H.-K. *Synthesis* **2000**, 13, 1863.

syringe. The resulting colorless solution was allowed to warm to rt over 3 h, and was subsequently quenched with saturated  $\text{NH}_4\text{Cl}$  solution. This crude mixture was extracted three times with diethyl ether, and the organic layers were dried over anhydrous  $\text{MgSO}_4$ , filtered and concentrated *in vacuo*. Purification via flash column chromatography (ethyl acetate/hexanes) afforded **2i** as a colorless oil (1.16g, 78%).  $^1\text{H}$  NMR (400 MHz,  $\text{CDCl}_3$ )  $\delta$  2.63 (tt,  $J = 6.7$ , 1.1 Hz, 2H), 4.46 (t,  $J = 6.6$  Hz, 1H), 5.12-5.18 (m, 2H), 6.00 (ddt,  $J = 17.0$ , 10.3, 6.8 Hz, 1H), 7.27-7.35 (m, 6H), 7.47-7.50 (m, 4H);  $^{13}\text{C}$  NMR (100 MHz  $\text{CDCl}_3$ )  $\delta$  40.0, 57.7, 118.2, 127.9, 129.0, 132.9, 134.2, 134.3; IR (neat): 3056, 2356, 1638, 1582, 1479, 1438, 1157, 1088, 1067, 1025, 990, 918, 739, 691  $\text{cm}^{-1}$ ; HRMS (EI) Calcd. for  $[\text{C}_{16}\text{H}_{16}\text{S}_2]^+$  272.0693, found 272.0700.

**(E)-hex-3-en-1-yl(phenyl)sulfane (5)**

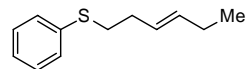

A flame-dried flask equipped with a stirbar was charged with 119 mg (5.0 mmol) of sodium hydride (60 % oil dispersion) and 10 mL dimethylformamide and maintained under argon. The mixture was cooled to 0 °C. Thiophenol (340  $\mu\text{L}$ , 3.3 mmol) was added via syringe, followed by (E)-hex-3-en-1-yl 4-methylbenzenesulfonate (928 mg, 3.7 mmol) in 10 mL dimethylformamide. The reaction was allowed to warm to rt and stirred for 20 h, at which point full conversion was observed via TLC analysis. The reaction was then cooled to 0 °C, quenched via the dropwise addition of water and diluted with diethyl ether. The organics were washed repeatedly with water and the separated aqueous phase was extracted three times with diethyl ether. The combined organics were washed with brine, dried over anhydrous  $\text{Na}_2\text{SO}_4$ , filtered and concentrated *in vacuo*. The desired product was isolated via flash chromatography (hexanes/ethyl acetate) as a clear oil (308 mg, 47 %).  $^1\text{H}$  NMR (400 MHz,  $\text{CDCl}_3$ )  $\delta$  0.97 (t, 3H), 2.01 (quintet,  $J = 7.2$  Hz, 2H), 2.33 (q,  $J = 7.1$ , 2H), 2.95 (t,  $J = 7.5$ , 2H), 5.40-5.57 (m, 2H), 7.17 (t,  $J = 7.2$  Hz, 1H), 7.26-7.34 (m, 4H);  $^{13}\text{C}$  NMR (75 MHz,  $\text{CDCl}_3$ )  $\delta$  13.9, 25.7, 32.5, 33.8, 125.9, 126.8, 129.0, 129.2, 134.2, 136.9; IR (neat): 2961, 2921, 1585, 1480, 1438, 1271, 1090, 1025, 967, 736, 690  $\text{cm}^{-1}$ ; HRMS (EI) Calcd. for  $[\text{C}_{12}\text{H}_{16}\text{S}]^+$  192.0973, found 192.0977.

**(Z)-hex-3-en-1-yl(phenyl)sulfane (6)**

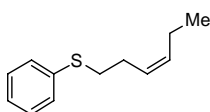

To a flask equipped with a stirbar was added thiophenol (254 mg, 2.29 mmol) in 4 mL benzene. The flask was purged with and maintained under argon, then

cooled to 0 °C. 1,8-Diazabicyclo[5.4.0]undec-7-ene (DBU, 380  $\mu$ L, 2.50 mmol) was added via syringe. The color of the solution changed from clear to yellow. (Z)-Hex-3-en-1-yl 4-methylbenzenesulfonate (700 mg, 2.75 mmol) was added in 4 ml benzene via syringe. The reaction was stirred for 4 h, at which point complete reaction was observed via TLC analysis. The crude reaction mixture was diluted with diethyl ether and water. The organics were washed three times with aqueous NaOH (1 M), water and brine, then dried over anhydrous Na<sub>2</sub>SO<sub>4</sub>, filtered, and concentrated *in vacuo*. The desired product was isolated via flash chromatography (pentane) as a clear oil (204 mg, 46%). <sup>1</sup>H NMR (400 MHz, CDCl<sub>3</sub>)  $\delta$  0.95 (t,  $J$  = 7.5 Hz, 3H), 2.01 (quintet,  $J$  = 7.0 Hz, 2H), 2.38 (q,  $J$  = 7.1 Hz, 2H), 2.94 (t,  $J$  = 7.5 Hz, 2H), 5.34-5.51 (m, 2H), 7.15-7.20 (m, 1H), 7.27-7.36 (m, 4H); <sup>13</sup>C NMR (100 MHz, CDCl<sub>3</sub>)  $\delta$  14.3, 20.7, 27.0, 33.6, 125.9, 126.5, 128.9, 129.1, 133.7, 136.7; IR (neat): 3058, 3004, 2962, 1505, 1480, 1438, 1280, 1216, 1093, 1069, 1025, 737, 691, 668 cm<sup>-1</sup>; HRMS (EI) Calcd. for [C<sub>12</sub>H<sub>16</sub>S]<sup>+</sup> 192.0973, found 192.0969.

### allyl(phenyl)sulfane (8)

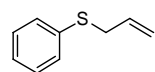

A flame-dried flask equipped with a stirbar was charged with 1.56g (11.3 mmol) of K<sub>3</sub>CO<sub>3</sub> and 40 mL dimethylformamide and maintained under argon at rt. Thiophenol (770  $\mu$ L, 7.5 mmol) was added via syringe, followed by allyl bromide (1.30 mL, 15 mmol). The reaction was allowed to stir for 6 h, at which point full conversion was observed via TLC analysis. The reaction was then diluted with diethyl ether and the organics were washed three times with NaOH (1M) and water, and once with brine. The combined organics were dried over MgSO<sub>4</sub>, filtered and concentrated *in vacuo*. The desired product was isolated via flash chromatography (hexanes) as a clear oil (833 mg, 74 %). <sup>1</sup>H NMR (400 MHz, CDCl<sub>3</sub>)  $\delta$  3.54 (dt,  $J$  = 6.9, 1.2 Hz, 2H), 5.06 (dq,  $J$  = 10.0, 1.1 Hz, 1H), 5.13 (dq,  $J$  = 17.0, 1.4 Hz, 1H), 5.87 (ddt,  $J$  = 16.9, 10.0, 6.9 Hz, 1H), 7.15-7.20 (m, 1H), 7.23-7.30 (m, 2H), 7.31-7.36 (m, 2H); <sup>13</sup>C NMR (100 MHz CDCl<sub>3</sub>)  $\delta$  37.3, 117.7, 126.3, 128.9, 129.9, 133.7, 136.0; IR (neat) 3075, 3008, 2911, 1636, 1583, 1480, 1438, 1228, 1089, 1025, 987, 918, 738, 690 cm<sup>-1</sup>; HRMS (EI) Calcd. for [C<sub>9</sub>H<sub>10</sub>S]<sup>+</sup> 150.0503, found 150.0502.

### 3. Rh-catalyzed Intermolecular Olefin Hydroacylation

#### (i) Standard Procedures

*General Method A - A typical Rh-catalyzed hydroacylation procedure with salicylaldehyde **1a**:*

In a glove box 0.01 mmol (5 mol %) (*R*)-SIPHOS-PE was dissolved in 800  $\mu$ L of degassed dichloromethane. The resultant solution was added to 0.005 mmol (2.5 mol %)  $[\text{Rh}(\text{COD})\text{Cl}]_2$ . This solution was transferred to a vial containing 0.01 mmol (5 mol %)  $\text{K}_3\text{PO}_4$ . 0.3 mmol (1.5 equiv) of olefin was dissolved in 800  $\mu$ L degassed dichloromethane and transferred to the reaction mixture. 0.2 mmol (1.0 equiv) salicylaldehyde **1a** was added via syringe. The reaction was stirred at ambient glovebox temperature (30  $^\circ\text{C}$ ) for the indicated period of time. The crude reaction mixture was purified via thin layer chromatography in hexanes/ethyl acetate.

*General Method B - A typical Rh-catalyzed hydroacylation procedure with solid salicylaldehyde derivatives:*

In a glove box 0.01 mmol (5 mol %) (*R*)-SIPHOS-PE was dissolved in 800  $\mu$ L of degassed dichloromethane. The resultant solution was added to 0.005 mmol (2.5 mol %)  $[\text{Rh}(\text{COD})\text{Cl}]_2$ . This solution was transferred to a vial containing 0.01 mmol (5 mol %)  $\text{K}_3\text{PO}_4$ . 0.3 mmol (1.5 equiv) of olefin was dissolved in 600  $\mu$ L degassed dichloromethane and transferred to a vial containing 0.2 mmol (1.0 equiv) of the salicylaldehyde derivative. The resulting solution was added to the reaction mixture via syringe. The vial containing the salicylaldehyde derivative was rinsed with an additional 200  $\mu$ L degassed dichloromethane, which was transferred to the reaction mixture. The reaction was stirred at ambient glovebox temperature (30  $^\circ\text{C}$ ) for the indicated period of time. The crude reaction mixture was purified via thin layer chromatography in hexanes/ethyl acetate.

#### (ii) Chiral Ligand Screen, Test Reaction with no Added Base

Ligand screening was performed according to a modification of Method A using salicylaldehyde **1a** (0.1 mmol), **2a** (0.15 mmol), 0.005 mmol (5 mol %)  $[\text{Rh}(\text{COD})\text{Cl}]_2$ , 0.01 mmol (10 mol %) ligand and 0.02 mmol (0.2 equiv)  $\text{K}_3\text{PO}_4$ .

Figure 1: Names and structures of ligands tested in this study:

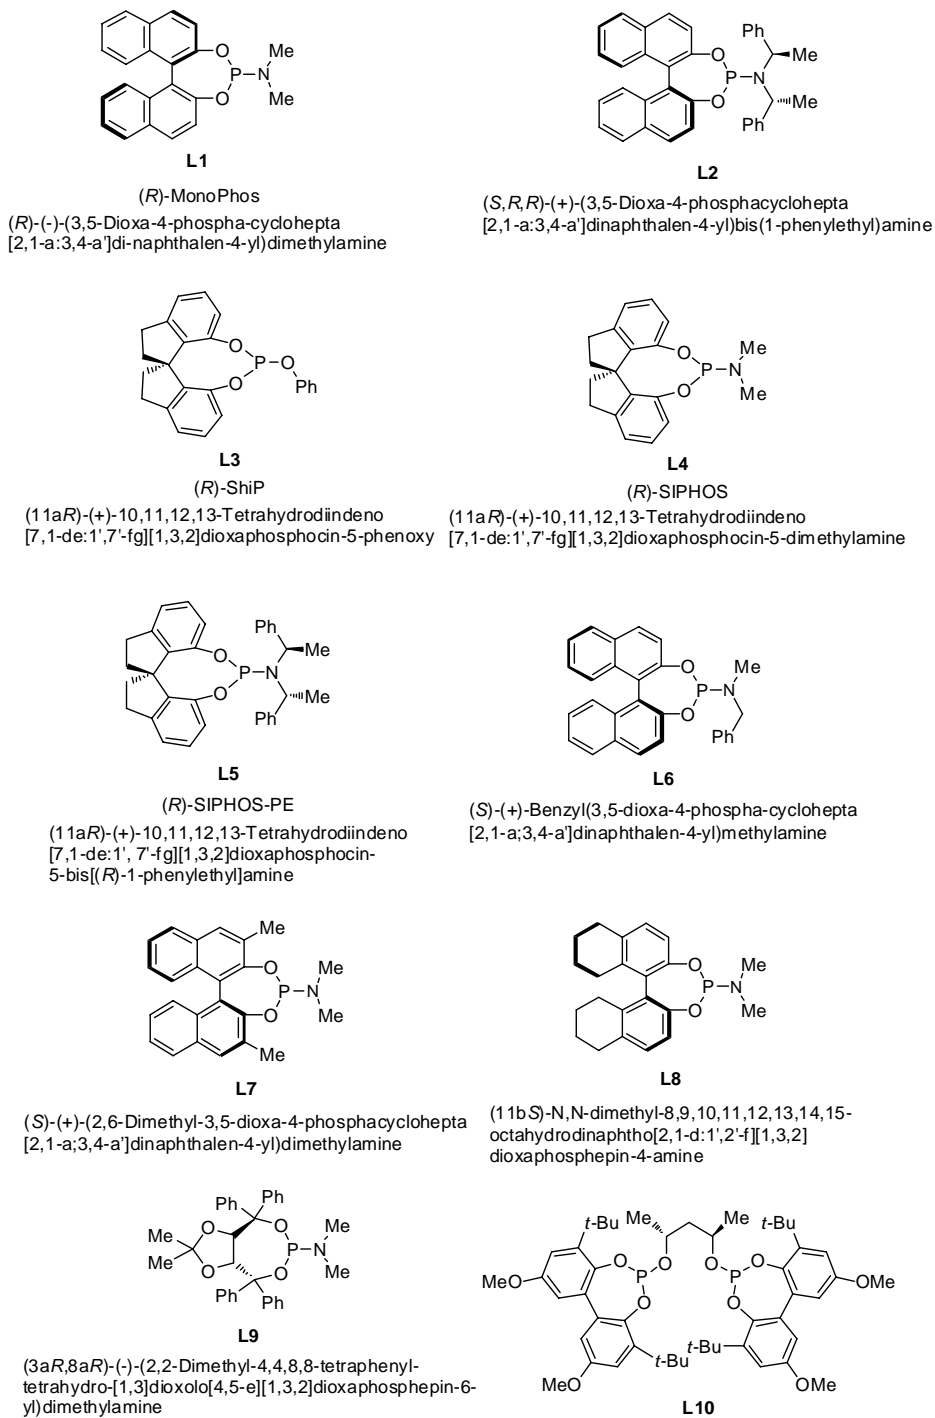

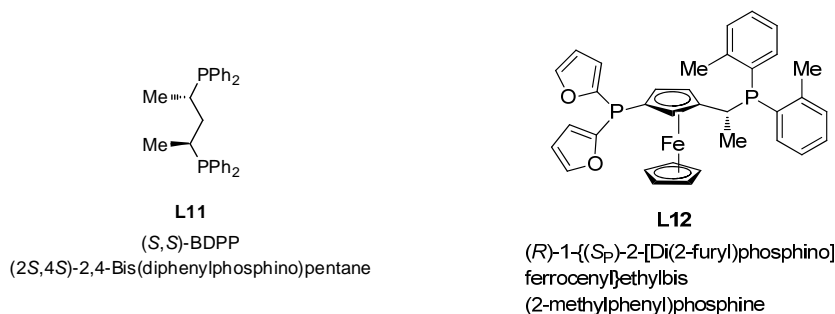Table 1. Ligand Effects in Regio- and Enantioselective Intermolecular Hydroacylation<sup>a</sup>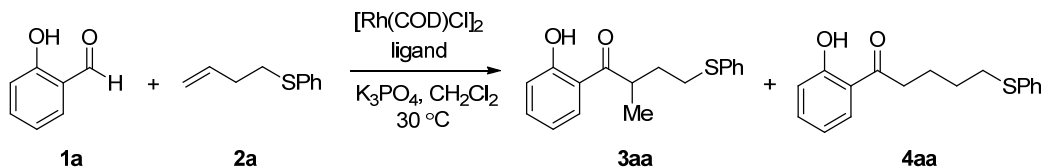

| Entry           | Ligand           | Time (h) | Conversion (%) <sup>b</sup> | Selectivity <sup>c</sup> | ee (%) <sup>d</sup> |
|-----------------|------------------|----------|-----------------------------|--------------------------|---------------------|
| 1               | <b>L1</b>        | 48       | >95                         | >20:1                    | –51                 |
| 2               | <b>L2</b>        | 24       | Full                        | >20:1                    | 62                  |
| 3               | <b>L3</b>        | 72       | 91                          | >20:1                    | 52                  |
| 4               | <b>L4</b>        | 20       | Full                        | >20:1                    | 66                  |
| 5               | <b>L5</b>        | 20       | Full                        | >20:1                    | 92                  |
| 6               | <b>L6</b>        | 72       | Full                        | >20:1                    | 43                  |
| 7               | <b>L7</b>        | 20       | Full                        | >20:1                    | 64                  |
| 8               | <b>L8</b>        | 86       | Full                        | >20:1                    | 56                  |
| 9               | <b>L9</b>        | 19       | Full                        | >20:1                    | 18                  |
| 10              | <b>L10</b>       | 72       | Trace                       | N/A                      | N/A                 |
| 11              | <b>L11</b>       | 104      | <5%                         | N/A                      | N/A                 |
| 12              | <b>L12</b>       | 46       | Trace                       | N/A                      | N/A                 |
| 13 <sup>e</sup> | <b>L12</b>       | 50       | None                        | N/A                      | N/A                 |
| 14              | PPh <sub>3</sub> | 22       | Full                        | >20:1                    | –                   |
| 15              | none             | 96       | 41                          | 4:1                      | –                   |

Table 1. <sup>a</sup> Conditions: salicylaldehyde **1a** (1.0 equiv), olefin **2a** (1.5 equiv), [Rh(COD)Cl]<sub>2</sub> (5 mol %) (COD = 1,5-cyclooctadiene), ligand (10 mol %), K<sub>3</sub>PO<sub>4</sub> (0.2 equiv.), CH<sub>2</sub>Cl<sub>2</sub>, 30 °C. <sup>b</sup> Determined via <sup>1</sup>H NMR or GC/MS analysis. <sup>c</sup> Selectivities for **3aa** over **4aa** were calculated via <sup>1</sup>H NMR analysis of crude reaction mixtures. <sup>d</sup> Ee's of **3aa** were determined by chiral HPLC

analysis. <sup>e</sup> Conditions: salicylaldehyde **1a** (1.0 equiv), olefin **2e** (1.5 equiv), [Rh(COD)Cl]<sub>2</sub> (2.5 mol %), ligand (5 mol %), K<sub>3</sub>PO<sub>4</sub> (5 mol %), CH<sub>2</sub>Cl<sub>2</sub>, 30 °C.

*Test Reaction with No Added Base:*

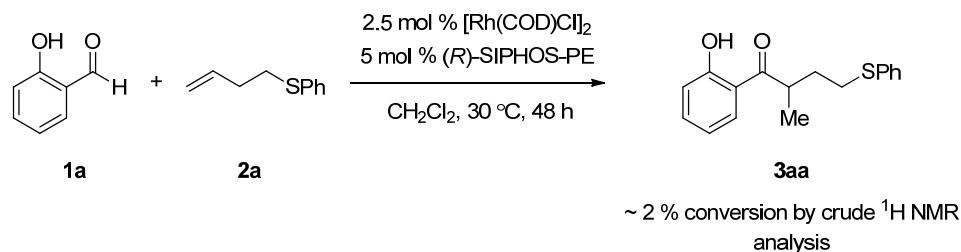

### (iii) Substrate Scope

#### 1-(2-hydroxyphenyl)-2-methyl-4-(phenylthio)butan-1-one (**3aa**)

**a** (Table 2, entry 1) The title compound was prepared from salicylaldehyde **1a** (0.2 mmol) and **2a** (0.3 mmol) according to Method A using 0.005 mmol (2.5 mol %) [Rh(COD)Cl]<sub>2</sub>, 0.01 mmol (5 mol %) (*R*)-SIPHOS-PE and 0.01 mmol (5 mol %) K<sub>3</sub>PO<sub>4</sub>. Purification via preparative TLC (16:1 hexanes:ethyl acetate) afforded the product as a clear oil (55.5 mg, 97%). <sup>1</sup>H NMR (400 MHz, CDCl<sub>3</sub>) δ 1.25 (d, *J* = 6.9 Hz, 3H), 1.74-1.83 (m, 1H), 2.22 (dq, *J* = 14.2, 7.2 Hz, 1H), 2.91-3.02 (m, 2H), 3.77 (sextet, *J* = 6.9 Hz, 1H), 6.84-6.88 (m, 1H), 6.99 (d, *J* = 8.4 Hz, 1H), 7.15-7.19 (m, 1H), 7.25-7.33 (m, 4H), 7.46 (ddd, *J* = 8.6, 7.4, 1.6 Hz, 1H), 7.74 (dd, *J* = 7.7 Hz, 1H), 12.45 (s, 0.7H); <sup>13</sup>C NMR (100 MHz, CDCl<sub>3</sub>) δ 17.7, 31.5, 32.7, 38.9, 118.6, 118.9, 119.1, 126.2, 129.1, 129.3, 130.0, 136.0, 136.6, 163.3, 209.8; COSY (see below); IR (neat): 2920, 1634, 1581, 1482, 1445, 1376, 1349, 1284, 1241, 1207, 1155, 1090, 1025, 975, 739, 691, 654, 600 cm<sup>-1</sup>; HRMS (EI) Calcd. for [C<sub>17</sub>H<sub>18</sub>O<sub>2</sub>S]<sup>+</sup> 286.1028, found 286.1015. HPLC analysis: 92% ee (CHIRALPAK IA), 1:99 isopropanol:hexanes, 1.0 mL/min, 254 nm, t<sub>R1</sub> = 7.7 min, t<sub>R2</sub> = 9.3 min; [α]<sub>D</sub><sup>27</sup> + 64 (*c* = 1.0, CHCl<sub>3</sub>).

**b) With AgClO<sub>4</sub>** (Table 2, entry 2): The title compound was prepared according to a variation of Method A. 0.005 mmol (2.5 mol %) [Rh(COD)Cl]<sub>2</sub> and 0.01 mmol (5 mol %) (*R*)-SIPHOS-PE were stirred in 800 μL dichloromethane for 15 minutes at ambient glovebox temperature. The solution was transferred to a vial containing 0.01 mmol (5 mol %) AgClO<sub>4</sub> and stirred for an

additional 15 minutes. The mixture was transferred to a vial containing 0.010 mmol (5 mol %)  $\text{K}_3\text{PO}_4$ . 0.3 mmol (1.5 equiv) **2a** in 800  $\mu\text{L}$  dichloromethane was added to the reaction mixture followed by 0.2 mmol (1.0 equiv) salicylaldehyde. Purification via preparative TLC (16:1 hexanes:ethyl acetate) afforded both regioisomers in a combined yield of 55.7 mg (97 %) with >20:1 selectivity for **3aa**. HPLC analysis: 93% ee;  $[\alpha]_{\text{D}}^{27} + 65$  ( $c = 1.0$ ,  $\text{CHCl}_3$ ).

### 1-(5-fluoro-2-hydroxyphenyl)-2-methyl-4-(phenylthio)butan-1-one (**3ba**)

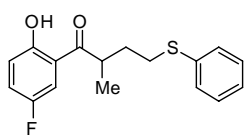

(Table 2, entry 3) The title compound was prepared from 5-fluoro-2-hydroxybenzaldehyde **1b** (28.1 mg, 0.2 mmol) and **2a** (0.3 mmol) according to Method B using 0.005 mmol (2.5 mol %)  $[\text{Rh}(\text{COD})\text{Cl}]_2$ , 0.01 mmol (5 mol %) (*R*)-SIPHOS-PE, and 0.01 mmol (5 mol %)  $\text{K}_3\text{PO}_4$ . Purification via preparative TLC (12:1 hexanes:ethyl acetate) afforded the product as a clear oil (57.0 mg, 93%).  $^1\text{H}$  NMR (400 MHz,  $\text{CDCl}_3$ )  $\delta$  1.24 (d,  $J = 6.9$  Hz, 3H), 1.74-1.82 (m, 1H), 2.21 (dq,  $J = 14.1$ , 7.1, 1H), 2.91-3.02 (m, 2H), 3.65 (sextet,  $J = 6.8$  Hz, 1H), 6.96 (dd,  $J = 9.1$ , 4.6 Hz, 1H), 7.13-7.35 (m, 6H), 7.41 (dd,  $J = 9.1$ , 1.0 Hz, 1H), 12.12 (s, 0.7H);  $^{13}\text{C}$  NMR (75 MHz,  $\text{CDCl}_3$ )  $\delta$  17.7, 31.5, 32.7, 39.1, 114.9 (d,  $J = 23.3$  Hz), 118.0 (d,  $J = 6.1$  Hz), 120.1 (d,  $J = 7.3$  Hz), 124.2 (d,  $J = 23.7$  Hz), 126.4, 129.3 (d,  $J = 21.3$  Hz), 135.8, 153.4, 156.5, 159.4, 209.0 (d,  $J = 2.5$  Hz); IR (neat): 2973, 1642, 1623, 1585, 1480, 1439, 1425, 1378, 1347, 1305, 1280, 1248, 1195, 1157, 1119, 1025, 992, 872, 829, 789, 739, 691  $\text{cm}^{-1}$ ; HRMS (EI) Calcd. for  $[\text{C}_{17}\text{H}_{17}\text{O}_2\text{SF}]^+$  304.0933, found 304.0942. HPLC analysis: 92% ee (CHIRALCEL OD-H), 1:99 isopropanol:hexanes, 1.0 mL/min, 254 nm,  $t_{\text{R}1} = 8.7$  min,  $t_{\text{R}2} = 10.6$  min;  $[\alpha]_{\text{D}}^{27} + 61$  ( $c = 1.0$ ,  $\text{CHCl}_3$ ).

### 1-(5-chloro-2-hydroxyphenyl)-2-methyl-4-(phenylthio)butan-1-one (**3ca**)

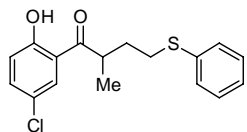

(Table 2, entry 4) The title compound was prepared from 5-chloro-2-hydroxybenzaldehyde **1c** (31.3 mg, 0.2 mmol) and **2a** (0.3 mmol) according to Method B using 0.005 mmol (2.5 mol %)  $[\text{Rh}(\text{COD})\text{Cl}]_2$ , 0.01 mmol (5 mol %) (*R*)-SIPHOS-PE and 0.01 mmol (5 mol %)  $\text{K}_3\text{PO}_4$ . Purification via preparative TLC (12:1 hexanes:ethyl acetate) afforded the product as a clear yellow oil (61.0 mg, 95%).  $^1\text{H}$  NMR (400 MHz,  $\text{CDCl}_3$ )  $\delta$  1.24 (d,  $J = 6.9$  Hz, 3H), 1.74-1.83 (m, 1H), 2.21 (dq,  $J = 14.1$ , 7.2, 1H), 2.90-3.02 (m, 2H), 3.63-3.71 (m, 1H), 6.95 (d,  $J = 8.91$ , 1H), 7.16 (t,  $J = 7.3$  Hz, 1H), 7.27 (t,  $J =$



7.3 Hz, 2H), 7.33 (d,  $J = 7.9$  Hz, 2H), 7.41 (dd,  $J = 8.9, 2.5$  Hz, 1H), 7.71 (d,  $J = 2.5$  Hz, 1H), 12.34 (s, 0.7H);  $^{13}\text{C}$  NMR (100 MHz,  $\text{CDCl}_3$ )  $\delta$  17.9, 31.5, 32.7, 39.0, 119.1, 120.5, 123.8, 126.4, 129.1, 129.2, 129.4, 135.8, 136.4, 161.7, 209.0; IR (neat): 2935, 1638, 1469, 1438, 1409, 1377, 1342, 1284, 1238, 1188, 1093, 1025, 981, 829, 793, 739, 691  $\text{cm}^{-1}$ ; HRMS (EI) Calcd. for  $[\text{C}_{17}\text{H}_{17}\text{O}_2\text{SCl}]^+$  320.0638, found 320.0652. HPLC analysis: 92% ee (CHIRALPAK AD-H), 1:99 isopropanol:hexanes, 0.5 mL/min, 254 nm,  $t_{\text{R1}} = 17.0$  min,  $t_{\text{R2}} = 18.6$  min;  $[\alpha]_{\text{D}}^{27} + 3$  ( $c = 1.0$ ,  $\text{CHCl}_3$ ).

### methyl 4-hydroxy-3-(2-methyl-4-(phenylthio)butanoyl)benzoate (**3da**)

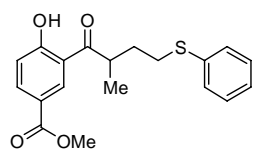

(Table 2, entry 5) The title compound was prepared from methyl 3-formyl-4-hydroxybenzoate **1d** (0.2 mmol) and **2a** (0.3 mmol) according to Method B using 0.005 mmol (2.5 mol %)  $[\text{Rh}(\text{COD})\text{Cl}]_2$ , 0.01 mmol (5 mol %) (*R*)-SIPHOS-PE and 0.01 mmol (5 mol %)  $\text{K}_3\text{PO}_4$ . Purification via preparative TLC (19:1 hexanes:ethyl acetate) afforded the product as a clear oil (66.7 mg, 97%).  $^1\text{H}$  NMR (400 MHz,  $\text{CDCl}_3$ )  $\delta$  1.26 (d,  $J = 7.0$  Hz, 3H), 1.82 (ddt,  $J = 14.1, 8.0, 6.3$  Hz, 1H), 2.23 (dtd,  $J = 14.0, 7.7, 6.5$  Hz, 1H), 2.87-3.04 (m, 2H), 3.77-3.87 (m, 1H), 3.93 (s, 3H), 7.02 (d,  $J = 8.8$  Hz, 1H), 7.11-7.16 (m, 1H), 7.21-7.26 (m, 2H), 7.33-7.29 (m, 2H), 8.13 (dd,  $J = 8.8, 2.1$  Hz, 1H), 8.53 (d,  $J = 2.1$  Hz, 1H), 12.87 (s, 0.8H);  $^{13}\text{C}$  NMR (100 MHz,  $\text{CDCl}_3$ )  $\delta$  18.3, 31.5, 32.8, 39.1, 52.3, 118.0, 119.1, 121.2, 126.2, 129.1, 129.3, 132.5, 135.9, 137.3, 166.0, 166.8, 209.9; IR (neat): 3063, 2951, 1718, 1638, 1584, 1482, 1438, 1359, 1309, 1274, 1228, 1111, 992, 967, 913, 807, 765, 740, 692  $\text{cm}^{-1}$ ; HRMS (ESI) Calcd. for  $[\text{C}_{19}\text{H}_{21}\text{O}_4\text{S}]^+$  ( $[\text{M}+\text{H}]^+$ ) 345.1155, found 345.1150. HPLC analysis: 92% ee (CHIRALCEL OD-H), 3:73 isopropanol:hexanes, 1.0 mL/min, 254.8 nm,  $t_{\text{R1}} = 11.4$  min,  $t_{\text{R2}} = 13.7$  min;  $[\alpha]_{\text{D}}^{27} \square 15$  ( $c = 1.0$ ,  $\text{CHCl}_3$ ).

### 1-(2-hydroxy-5-methylphenyl)-2-methyl-4-(phenylthio)butan-1-one (**3ea**)

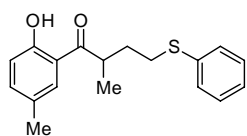

(Table 2, entry 6) The title compound was prepared from 2-hydroxy-5-methylbenzaldehyde **1e** (26.9 mg, 0.2 mmol) and **2a** (0.3 mmol) according to Method B using 0.005 mmol (2.5 mol %)  $[\text{Rh}(\text{COD})\text{Cl}]_2$ , 0.01 mmol (5 mol %) (*R*)-SIPHOS-PE and 0.01 mmol (5 mol %)  $\text{K}_3\text{PO}_4$ . Purification via preparative TLC (20:1 hexanes:ethyl acetate) afforded the product as a clear oil (53.4 mg, 90%).  $^1\text{H}$  NMR (400 MHz,  $\text{CDCl}_3$ )  $\delta$  1.24 (d,  $J = 6.9$  Hz, 3H), 1.74-1.83 (m, 1H), 2.18-2.27 (m, 1H), 2.28 (s, 3H),

2.90-3.02 (m, 2H), 3.71-3.79 (m, 1H), 6.90 (d,  $J = 8.5$  Hz, 1H), 7.14-7.18 (m, 1H), 7.24-7.33 (m, 5H), 7.53 (d,  $J = 1.6$  Hz, 1H), 12.34 (s, 0.7H);  $^{13}\text{C}$  NMR (100 MHz,  $\text{CDCl}_3$ )  $\delta$  17.9, 20.7, 31.5, 32.9, 38.8, 118.3, 118.6, 126.2, 128.1, 129.1, 129.2, 129.7, 136.2, 137.7, 161.2, 209.7; IR (neat): 2924, 1637, 1612, 1585, 1482, 1439, 1289, 1245, 1211, 1025, 980, 788, 739, 691  $\text{cm}^{-1}$ ; HRMS (EI) Calcd. for  $[\text{C}_{18}\text{H}_{20}\text{O}_2\text{S}]^+$  300.1184, found 300.1181. HPLC analysis: 93% ee (CHIRALCEL OJ-H), 1:99 isopropanol:hexanes, 1.0 mL/min, 254 nm,  $t_{\text{R}1} = 16.8$  min,  $t_{\text{R}2} = 23.3$  min;  $[\alpha]_{\text{D}}^{27} + 33$  ( $c = 1.0$ ,  $\text{CHCl}_3$ ).

### 1-(2-hydroxy-5-methoxyphenyl)-2-methyl-4-(phenylthio)butan-1-one (3fa)

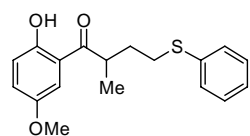

(Table 2, entry 7) The title compound was prepared from 2-hydroxy-5-methylbenzaldehyde **1f** (30.5 mg, 0.2 mmol) and **2a** (0.3 mmol) according to Method B using 0.01 mmol (5 mol %)  $[\text{Rh}(\text{COD})\text{Cl}]_2$ , 0.02 mmol (10 mol %) (*R*)-SIPHOS-PE and 0.02 mmol (10 mol %)  $\text{K}_3\text{PO}_4$ . Purification via preparative TLC (16:1 hexanes:ethyl acetate) afforded the product as a clear yellow oil (59.2 mg, 93%).  $^1\text{H}$  NMR (400 MHz,  $\text{CDCl}_3$ )  $\delta$  1.25 (d,  $J = 6.9$  Hz, 3H), 1.75-1.84 (m, 1H), 2.23 (dq,  $J = 14.1, 7.2$  Hz, 1H), 2.90-3.04 (m, 2H), 3.76 (sextet,  $J = 6.9$  Hz, 1H), 3.78 (s, 3H), 6.94 (d,  $J = 9.1$  Hz, 1H), 7.12 (dd,  $J = 9.1, 3.0$  Hz, 1H), 7.14-7.18 (m, 1H), 7.24-7.33 (m, 5H), 12.07 (s, 0.8H);  $^{13}\text{C}$  NMR (100 MHz,  $\text{CDCl}_3$ )  $\delta$  17.7, 31.5, 32.9, 38.9, 56.1, 112.8, 118.1, 119.7, 124.4, 126.2, 129.1, 129.2, 136.1, 151.9, 157.7, 209.3; IR (neat): 2937, 1639, 1612, 1584, 1484, 1439, 1378, 1283, 1164, 1039, 984, 830, 791, 740, 691  $\text{cm}^{-1}$ ; HRMS (ESI) Calcd. for  $[\text{C}_{18}\text{H}_{21}\text{O}_3\text{S}]^+$  ( $[\text{M}+\text{H}]^+$ ) 317.1205, found 317.1198. HPLC analysis: 93% ee (CHIRALCEL OD-H), 5:95 isopropanol:hexanes, 1.0 mL/min, 254 nm,  $t_{\text{R}1} = 8.1$  min,  $t_{\text{R}2} = 9.0$  min;  $[\alpha]_{\text{D}}^{27} + 41$  ( $c = 1.0$ ,  $\text{CHCl}_3$ ).

### 1-(2-hydroxy-3-methoxyphenyl)-2-methyl-4-(phenylthio)butan-1-one (3ga)

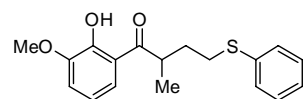

**a)** (Table 2, entry 8) The title compound was prepared from 2-hydroxy-3-methoxybenzaldehyde **1g** (30.6 mg, 0.2 mmol) and **2a** (0.3 mmol) according to Method B using 0.005 mmol (2.5 mol %)  $[\text{Rh}(\text{COD})\text{Cl}]_2$ , 0.01 mmol (5 mol %) (*R*)-SIPHOS-PE and 0.01 mmol (5 mol %)  $\text{K}_3\text{PO}_4$ . Purification via preparative TLC (10:1-8:1 hexanes:ethyl acetate) afforded the product as a clear yellow oil (58.1 mg, 91%).  $^1\text{H}$  NMR (400 MHz,  $\text{CDCl}_3$ )  $\delta$  1.24 (d,  $J = 6.9$  Hz, 3H), 1.73-1.82 (m, 1H), 2.22 (dq,  $J = 14.3, 7.2$  Hz, 1H), 2.91-3.02 (m, 2H), 3.71-3.79 (m, 1H), 3.91 (s, 3H), 6.80 (t,  $J = 8.1$  Hz, 1H), 7.05 (d,  $J = 7.9$ ,

1H), 7.14-7.19 (m, 1H), 7.24-7.36 (m, 5H), 12.78 (s, 0.7H); <sup>13</sup>C NMR (100 MHz, CDCl<sub>3</sub>) δ 17.7, 31.5, 32.7, 39.3, 56.3, 117.1, 118.3, 118.7, 121.2, 126.2, 129.1, 129.3, 136.0, 149.3, 153.7, 210.2; IR (neat): 2935, 1633, 1584, 1453, 1436, 1360, 1251, 1087, 1003, 783, 739, 691 cm<sup>-1</sup>; HRMS (ESI) Calcd. for [C<sub>18</sub>H<sub>21</sub>O<sub>3</sub>S]<sup>+</sup> ([M+H]<sup>+</sup>) 317.1205, found 317.1198. HPLC analysis: 92% ee (CHIRALCEL OD-H), 5:95 isopropanol:hexanes, 1.0 mL/min, 254 nm, t<sub>R1</sub> = 14.1 min, t<sub>R2</sub> = 18.0 min; [α]<sub>D</sub><sup>27</sup> + 63 (c = 1.0, CHCl<sub>3</sub>).

**b) With 2 equiv. 2a** (Table 2, entry 9) Using 30.5 mg (0.2 mmol) **1g**. Purification via preparative TLC (10:1-8:1 hexanes:ethyl acetate) afforded the product as a clear yellow oil (57.7 mg, 91%). HPLC analysis: 93% ee; [α]<sub>D</sub><sup>27</sup> + 63 (c = 1.0, CHCl<sub>3</sub>).

### 1-(2-hydroxy-6-methylphenyl)-2-methyl-4-(phenylthio)butan-1-one (**3ha**)

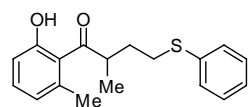

(Table 2, entry 10) The title compound was prepared from 6-methylsalicylaldehyde **1h** (0.2 mmol) and **2a** (0.3 mmol) according to Method B using 0.01 mmol (5 mol %) [Rh(COD)Cl]<sub>2</sub>, 0.02 mmol (10 mol %) (*R*)-SIPHOS-PE, and 0.02 mmol (10 mol %) K<sub>3</sub>PO<sub>4</sub> at 40 °C. Purification via preparative TLC (40:1 hexanes:ethyl acetate) afforded the product as a yellow oil (56.5 mg, 94%). <sup>1</sup>H NMR (400 MHz, CDCl<sub>3</sub>) δ 1.23 (d, 3H, *J* = 6.9 Hz), 1.71-1.83 (m, 1H), 2.15-2.26 (m, 1H), 2.26 (s, 3H), 2.87-3.03 (m, 2H), 3.76 (sextet, *J* = 6.9 Hz, 1H), 6.76 (t, *J* = 8.0 Hz, 1H), 7.13-7.19 (m, 1H), 7.23-7.29 (m, 2H), 7.29-7.35 (m, 3H), 7.60 (d, *J* = 7.8 Hz, 1H), 12.79 (s, 0.8H); <sup>13</sup>C NMR (100 MHz, CDCl<sub>3</sub>) δ 15.7, 17.8, 31.5, 32.8, 38.9, 117.9, 118.4, 126.2, 127.6, 127.9, 129.1, 129.3, 136.1, 137.3, 161.8, 210.0; IR (neat): 2967, 2929, 1629, 1583, 1481, 1426, 1379, 1348, 1279, 1265, 1245, 1087, 1056, 1024, 987, 822, 740, 691 cm<sup>-1</sup>; HRMS (ESI+) Calcd. for [C<sub>18</sub>H<sub>20</sub>O<sub>2</sub>NaS]<sup>+</sup> ([M+Na]<sup>+</sup>) 323.1076, found 323.1067. HPLC analysis: 84% ee (CHIRALCEL AD-H), 1:99 isopropanol:hexanes, 1.0 mL/min, 254 nm, t<sub>R1</sub> = 7.3 min, t<sub>R2</sub> = 8.2 min; [α]<sub>D</sub><sup>27</sup> + 70 (c = 1.0, CHCl<sub>3</sub>).

### 1-(2-hydroxyphenyl)-5-(phenylthio)pentan-1-one (**4aa**)

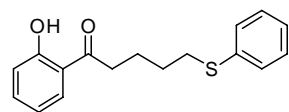

The title compound was isolated via a modification of Method A using salicylaldehyde **1a** (0.2 mmol), **2a** (0.3 mmol), 0.02 mmol (10 mol %) [Rh(COD)Cl]<sub>2</sub> and 0.04 mmol (0.2 equiv.) K<sub>3</sub>PO<sub>4</sub>. After heating at 40 °C for 96 h, **4aa** was isolated via preparative TLC (25:1-35:1 hexanes:ethyl acetate) as a white solid

(< 10% isolated yield 2.7:1 selectivity **3aa:4aa**); mp 59-60 °C. <sup>1</sup>H NMR (400 MHz, CDCl<sub>3</sub>) δ 1.71-1.79 (m, 2H), 1.87-1.94 (m, 2H), 2.98 (t, *J* = 7.1 Hz, 2H), 3.01 (t, *J* = 7.2 Hz, 2H), 6.89 (ddd, *J* = 8.2, 7.3, 1.1 Hz, 1H), 6.98 (dd, *J* = 8.4, 1.1 Hz, 1H), 7.16-7.20 (m, 1H), 7.26-7.30 (m, 2H), 7.33-7.35 (m, 2H), 7.46 (ddd, *J* = 8.6, 7.2, 1.1 Hz, 1H), 7.74 (dd, *J* = 8.1, 1.7 Hz, 1H), 12.31 (s, 0.9H); <sup>13</sup>C NMR (75 MHz, CDCl<sub>3</sub>) δ 23.5, 28.8, 33.6, 37.8, 118.7, 119.0, 119.4, 126.1, 129.0, 129.4, 130.0, 136.46, 136.53, 162.6, 206.2; IR (film): 2930, 1638, 1614, 1582, 1482, 1446, 1353, 1286, 1262, 1206, 1156, 1091, 1025, 977, 754, 691 cm<sup>-1</sup>; HRMS (ESI) Calcd. for [C<sub>17</sub>H<sub>19</sub>O<sub>2</sub>S]<sup>+</sup> ([M+H]<sup>+</sup>) 287.1100, found 287.1087.

### 1-(2-hydroxyphenyl)-2-methyl-4-(naphthalen-1-ylthio)butan-1-one (**3ab**)

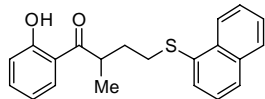 (Table 3, entry 1) The title compound was prepared from salicylaldehyde **1a** (0.2 mmol) and **2b** (0.3 mmol) according to Method A using 0.01 mmol (5 mol %) [Rh(COD)Cl]<sub>2</sub>, 0.02 mmol (10 mol %) (*R*)-SIPHOS-PE and 0.02 mmol (10 mol %) K<sub>3</sub>PO<sub>4</sub>. Purification via preparative TLC (30:1-24:1 hexanes:ethyl acetate) afforded the product as a clear yellow oil (49.6 mg, 74%). <sup>1</sup>H NMR (400 MHz, CDCl<sub>3</sub>) δ 1.23 (d, *J* = 6.9 Hz, 3H), 1.75-1.84 (m, 1H), 2.24 (dq, *J* = 14.1, 7.2, 1H), 2.99-3.10 (m, 2H), 3.78 (sextet, *J* = 6.9 Hz, 1H), 6.76 (ddd, *J* = 8.2, 7.2, 8.2, 1H), 6.98 (dd, *J* = 8.4, 1.1 Hz, 1H), 7.39 (dd, *J* = 7.3, 8.1 Hz, 1H), 7.44 (ddd, *J* = 8.6, 7.3, 1.6, 1H), 7.50-7.57 (m, 3H), 7.68 (dd, *J* = 8.1, 2.5 Hz, 1H), 7.72 (d, *J* = 8.2 Hz, 1H), 7.85 (dd, *J* = 7.2, 2.2 Hz, 1H), 8.38-8.41 (m, 1H), 12.46 (s, 0.7H); <sup>13</sup>C NMR (100 MHz, CDCl<sub>3</sub>) δ 17.8, 32.1, 32.7, 38.9, 118.6, 118.8, 119.0, 125.0, 125.7, 126.4, 126.6, 127.5, 128.3, 128.8, 130.0, 133.06, 133.12, 134.1, 136.5, 163.3, 209.8; IR (neat): 2968, 1634, 1581, 1564, 1486, 1445, 1382, 1349, 1288, 1241, 1205, 1155, 975, 790, 770 cm<sup>-1</sup>; HRMS (EI) Calcd. for [C<sub>21</sub>H<sub>20</sub>O<sub>2</sub>S]<sup>+</sup> 336.1184, found 336.1175. HPLC analysis: 95% ee (CHIRALPAK IB), 1:99 isopropanol:hexanes, 1.0 mL/min, 254 nm, t<sub>R1</sub> = 9.8 min, t<sub>R2</sub> = 10.8 min; [α]<sub>D</sub><sup>27</sup> + 102 (*c* = 0.5, CHCl<sub>3</sub>).

### 1-(2-hydroxyphenyl)-2-methyl-4-(naphthalen-2-ylthio)butan-1-one (**3ac**)

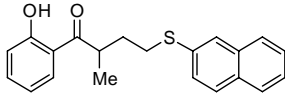 (Table 3, entry 2) The title compound was prepared from salicylaldehyde **1a** (0.2 mmol) and **2c** (0.3 mmol) according to Method A using 0.005 mmol (2.5 mol %) [Rh(COD)Cl]<sub>2</sub>, 0.01 mmol (5 mol %) (*R*)-SIPHOS-PE and 0.01 mmol (5 mol %) K<sub>3</sub>PO<sub>4</sub>. Purification via preparative TLC (16:1 hexanes:ethyl acetate)

afforded the product as a clear oil (64.8 mg, 96%).  $^1\text{H}$  NMR (400 MHz,  $\text{CDCl}_3$ )  $\delta$  1.26 (d,  $J$  = 6.9 Hz, 3H), 1.79-1.87 (m, 1H), 2.28 (dq,  $J$  = 14.2, 7.2 Hz, 1H), 3.01-3.13 (m, 2H), 3.80 (sextet,  $J$  = 6.9 Hz, 1H), 6.75 (ddd,  $J$  = 8.2, 7.3, 1.1 Hz, 1H), 6.97 (dd,  $J$  = 8.4, 1.0 Hz, 1H), 7.38-7.49 (m, 4H), 7.70-7.78 (m, 5H), 12.46 (s, 0.7H);  $^{13}\text{C}$  NMR (100 MHz,  $\text{CDCl}_3$ )  $\delta$  17.8, 31.3, 32.7, 38.9, 118.5, 118.8, 119.0, 125.8, 126.7, 127.1, 127.2, 127.3, 127.8, 128.6, 129.9, 131.9, 133.5, 133.9, 136.5, 163.3, 209.8; IR (neat): 2970, 1634, 1581, 1487, 1445, 1380, 1349, 1267, 1241, 1207, 1155, 1133, 1071, 975, 943, 852, 812, 755  $\text{cm}^{-1}$ ; HRMS (EI) Calcd. for  $[\text{C}_{21}\text{H}_{20}\text{O}_2\text{S}]^+$  336.1184, found 336.1176. HPLC analysis: 92% ee (CHIRALPAK IA), 1:99 isopropanol:hexanes, 0.5 mL/min, 254 nm,  $t_{\text{R}1}$  = 28.0 min,  $t_{\text{R}2}$  = 31.3 min;  $[\alpha]_{\text{D}}^{27}$  + 58 ( $c$  = 0.5,  $\text{CHCl}_3$ ).

#### methyl 2-((4-(2-hydroxyphenyl)-3-methyl-4-oxobutyl)thio)benzoate (**3ad**)

(Table 3, entry 3) The title compound was prepared from salicylaldehyde **1a** (0.2 mmol) and **2d** (0.3 mmol) according to Method A using 0.010 mmol (5 mol %)  $[\text{Rh}(\text{COD})\text{Cl}]_2$ , 0.02 mmol (10 mol %) (*R*)-SIPHOS-PE and 0.02 mmol (10 mol %)  $\text{K}_3\text{PO}_4$ . Purification via preparative TLC (6:1-8:1 hexanes:ethyl acetate) afforded the product as a clear oil (63.1 mg, 92%).  $^1\text{H}$  NMR (400 MHz,  $\text{CDCl}_3$ )  $\delta$  1.27 (d,  $J$  = 6.9 Hz, 3H), 1.86 (ddt,  $J$  = 14.1, 8.0, 6.3, 1H), 2.33 (dtd,  $J$  = 14.2, 7.8, 6.7 Hz, 1H), 2.87-3.03 (m, 2H), 3.75-3.82 (m, 1H), 3.90 (s, 3H), 6.86 (ddd,  $J$  = 8.2, 7.2, 1.2, 1H), 6.98 (dd,  $J$  = 8.4, 1.0 Hz, 1H), 7.14 (dd,  $J$  = 8.4, 7.7, 1.1 Hz, 1H), 7.29 (dd,  $J$  = 8.1, 0.7 Hz, 1H), 7.39-7.45 (m, 2H), 7.77 (dd,  $J$  = 8.1, 1.6 Hz, 1H), 7.94 (dd,  $J$  = 7.8, 1.5 Hz, 1H), 12.45 (s, 0.7H);  $^{13}\text{C}$  NMR (100 MHz,  $\text{CDCl}_3$ )  $\delta$  18.1, 29.8, 31.7, 39.3, 52.2, 118.5, 118.8, 119.1, 124.1, 125.8, 128.0, 130.0, 131.4, 132.5, 136.6, 141.1, 163.3, 167.0, 209.7; IR (neat): 2949, 1713, 1634, 1586, 1487, 1445, 1378, 1350, 1272, 1248, 1209, 1144, 1108, 1062, 975, 825, 744, 694  $\text{cm}^{-1}$ ; HRMS (EI) Calcd. for  $[\text{C}_{19}\text{H}_{20}\text{O}_4\text{S}]^+$  344.1082, found 344.1086. HPLC analysis: 97% ee (CHIRALPAK IC), 1:99 isopropanol:hexanes, 1.0 mL/min, 254 nm,  $t_{\text{R}1}$  = 26.1 min,  $t_{\text{R}2}$  = 30.5 min;  $[\alpha]_{\text{D}}^{27}$  + 80 ( $c$  = 1.0,  $\text{CHCl}_3$ ).

#### 4-((4-chlorophenyl)thio)-1-(2-hydroxyphenyl)-2-methylbutan-1-one (**3ae**)

(Table 3, entry 4) The title compound was prepared from salicylaldehyde **1a** (0.2 mmol) and **2e** (0.3 mmol) according to Method A using 0.01 mmol (5 mol %)  $[\text{Rh}(\text{COD})\text{Cl}]_2$ , 0.02 mmol (10 mol %) (*R*)-SIPHOS-PE and 0.02 mmol (10 mol %)  $\text{K}_3\text{PO}_4$ . Purification via preparative TLC (40:1 hexanes:ethyl acetate) afforded the product as a

yellow oil (63.5 mg, 99%).  $^1\text{H}$  NMR (400 MHz,  $\text{CDCl}_3$ )  $\delta$  1.25 (d,  $J = 6.9\text{ Hz}$ , 3H), 1.72-1.81 (m, 1H), 2.17-2.26 (m, 1H), 2.86-2.99 (m, 2H), 3.68-3.77 (m, 1H), 6.86 (ddd,  $J = 8.2, 7.2, 1.2\text{ Hz}$ , 1H), 6.99 (dd,  $J = 8.4, 1.1\text{ Hz}$ , 1H), 7.22 (s, 4H), 7.47 (ddd,  $J = 8.6, 7.2, 1.6\text{ Hz}$ , 1H), 7.72 (dd,  $J = 8.1, 1.6\text{ Hz}$ , 1H), 12.43 (s, 0.7H);  $^{13}\text{C}$  NMR (100 MHz,  $\text{CDCl}_3$ )  $\delta$  18.0, 31.8, 32.6, 38.9, 118.5, 119.0, 119.1, 129.2, 129.9, 130.6, 132.2, 134.6, 136.7, 163.3, 209.6; IR (neat): 2967, 2932, 2876, 1635, 1611, 1579, 1476, 1446, 1381, 1348, 1290, 1241, 1208, 1155, 1095, 1011, 975, 815, 758. HRMS (EI) Calcd. for  $[\text{C}_{17}\text{H}_{17}\text{O}_2\text{SCl}]^+$  320.0638, found 320.0632. HPLC analysis: 93% ee (CHIRALCEL OD-H), 1:99 isopropanol:hexanes, 0.5 mL/min, 254 nm,  $t_{\text{R}1} = 24.8\text{ min}$ ,  $t_{\text{R}2} = 28.6\text{ min}$ ;  $[\alpha]_{\text{D}}^{27} + 55$  ( $c = 1.0$ ,  $\text{CHCl}_3$ ).

### 1-(2-hydroxyphenyl)-4-((4-methoxyphenyl)thio)-2-methylbutan-1-one (3af)

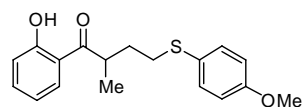

(Table 3, entry 5) The title compound was prepared from salicylaldehyde **1a** (0.2 mmol) and **2f** (0.3 mmol) according to Method A using 0.005 mmol (2.5 mol %)  $[\text{Rh}(\text{COD})\text{Cl}]_2$ , 0.01 mmol (5 mol %) (*R*)-SIPHOS-PE and 0.01 mmol (5 mol %)  $\text{K}_3\text{PO}_4$ . Purification via preparative TLC (16:1 hexanes:ethyl acetate) afforded the product as a yellow oil (56.7 mg, 90%).  $^1\text{H}$  NMR (400 MHz,  $\text{CDCl}_3$ )  $\delta$  1.22 (d,  $J = 6.9\text{ Hz}$ , 3H), 1.67-1.77 (m, 1H), 2.15 (dq,  $J = 14.1, 7.1\text{ Hz}$ , 1H), 2.81-2.92 (m, 2H), 3.71-3.78 (m, 4H), 6.82 (d,  $J = 8.9, 2\text{ Hz}$ , 2H), 6.87 (ddd,  $J = 8.3, 7.2, 1.2\text{ Hz}$ , 1H), 6.98 (dd,  $J = 8.4, 1.0\text{ Hz}$ , 1H), 7.32 (d,  $J = 8.9, 2\text{ Hz}$ , 2H), 7.46 (ddd,  $J = 8.5, 7.2, 1.6\text{ Hz}$ , 1H), 7.75 (dd,  $J = 8.1, 1.6\text{ Hz}$ , 1H), 12.47 (s, 0.7H);  $^{13}\text{C}$  NMR (100 MHz,  $\text{CDCl}_3$ )  $\delta$  17.7, 33.0, 33.6, 38.8, 55.4, 114.8, 118.6, 118.8, 119.0, 126.0, 130.0, 133.2, 136.5, 159.1, 163.3, 209.9; IR (neat): 2934, 1634, 1592, 1498, 1445, 1376, 1349, 1284, 1243, 1208, 1180, 1155, 1105, 1033, 975, 826, 756,  $700\text{ cm}^{-1}$ ; HRMS (ESI) Calcd. for  $[\text{C}_{18}\text{H}_{21}\text{O}_3\text{S}]^+$  ( $[\text{M}+\text{H}]^+$ ) 317.1205, found 317.1206. HPLC analysis: 87% ee (CHIRALCEL OD-H), 10:90 isopropanol:hexanes, 1.0 mL/min, 254 nm,  $t_{\text{R}1} = 13.0\text{ min}$ ,  $t_{\text{R}2} = 14.4\text{ min}$ ;  $[\alpha]_{\text{D}}^{27} + 45$  ( $c = 1.0$ ,  $\text{CHCl}_3$ ).

### 4-(cyclohexylthio)-1-(2-hydroxyphenyl)-2-methylbutan-1-one (3ag)

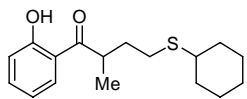

(Table 3, entry 6) The title compound was prepared from salicylaldehyde (0.2 mmol) and **2g** (0.3 mmol) according to Method A using 0.010 mmol (5 mol %)  $[\text{Rh}(\text{COD})\text{Cl}]_2$ , 0.02 mmol (10 mol %) (*R*)-SIPHOS-PE, and 0.02 mmol (10 mol %)  $\text{K}_3\text{PO}_4$ . Purification via preparative TLC (40:1 hexanes:ethyl acetate) afforded the product as a

yellow oil (58.0 mg, 99%).  $^1\text{H}$  NMR (400 MHz,  $\text{CDCl}_3$ )  $\delta$  1.20-1.35 (m, 8H), 1.57-1.65 (m, 1H), 1.65-1.82 (m, 3H), 1.86-2.00 (m, 2H), 2.14 (dq,  $J = 14.3, 7.2$  Hz, 1H), 2.48-2.64 (m, 3H), 3.75 (sextet,  $J = 6.8$  Hz, 1H), 6.88-6.95 (m, 1H), 7.00 (dd,  $J = 0.9$  Hz,  $J = 8.4$  Hz, 1H), 7.44-7.51 (m, 1H), 7.86 (dd,  $J = 8.1, 1.4$  Hz, 1H), 12.51 (s, 0.7H);  $^{13}\text{C}$  NMR (100 MHz,  $\text{CDCl}_3$ )  $\delta$  17.6, 26.0, 26.21, 26.24, 27.9, 33.66, 33.76, 33.82, 39.0, 43.6, 118.7, 118.9, 119.0, 130.1, 136.5, 163.3, 210.2; IR (neat): 2928, 2851, 1635, 1611, 1581, 1487, 1446, 1375, 1349, 1285, 1241, 1206, 1154, 975, 756. HRMS (ESI+) Calcd. for  $[\text{C}_{17}\text{H}_{25}\text{O}_2\text{S}]^+$  293.1569, found 293.1557. HPLC analysis: 55% ee (CHIRALCEL OJ-H), 1:99 isopropanol:hexanes, 0.5 mL/min, 254 nm,  $t_{\text{R}1} = 10.6$  min,  $t_{\text{R}2} = 11.6$  min;  $[\alpha]_{\text{D}}^{27} + 36$  ( $c = 1.0$ ,  $\text{CHCl}_3$ ).

### 3-(1,3-dithian-2-yl)-1-(2-hydroxyphenyl)-2-methylpropan-1-one (3ah)

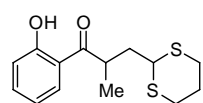

(Table 3, entry 7) The title compound was prepared from salicylaldehyde **1a** (0.1 mmol) and **2h** (0.15 mmol) according to Method A using 0.005 mmol (5 mol %)  $[\text{Rh}(\text{COD})\text{Cl}]_2$ , 0.01 mmol (10 mol %) (*R*)-SIPHOS-PE and 0.01 mmol (10 mol %)  $\text{K}_3\text{PO}_4$ . Purification via preparative TLC (3% ethyl acetate in hexanes) afforded the product as a colorless oil (23.7 mg, 84%).  $^1\text{H}$  NMR (400 MHz,  $\text{CDCl}_3$ )  $\delta$  1.26 (d,  $J = 7.0$  Hz, 3H), 1.81-1.92 (m, 2H), 2.05-2.13 (m, 1H), 2.42 (ddd,  $J = 14.3, 7.8, 7.2$  Hz, 1H), 2.77-2.85 (m, 4H), 3.86-3.85 (m, 1H), 4.01 (t,  $J = 7.5$  Hz, 1H), 6.92 (ddd,  $J = 8.4, 7.4, 1.1$  Hz, 1H), 6.99 (dd,  $J = 8.4, 0.8$  Hz, 1H), 7.48 (ddd,  $J = 8.6, 7.4, 1.5$  Hz, 1H), 7.85 (dd,  $J = 8.1, 1.5$  Hz, 1H), 12.41 (s, 0.7H);  $^{13}\text{C}$  NMR (100 MHz,  $\text{CDCl}_3$ )  $\delta$  18.6, 26.0, 30.1, 30.2, 37.4, 38.6, 45.2, 118.5, 118.8, 119.2, 130.1, 136.6, 163.3, 209.2; IR (neat): 2898, 1634, 1580, 1487, 1446, 1376, 1348, 1276, 1243, 1207, 1158, 1035, 974, 908, 862, 828, 756, 733, 700  $\text{cm}^{-1}$ ; HRMS (EI) Calcd. for  $[\text{C}_{14}\text{H}_{18}\text{O}_2\text{S}_2]^+$  282.0748, found 282.0752. HPLC analysis: 36% ee (CHIRALPAK IA), 1:99 isopropanol:hexanes, 1.0 mL/min, 254 nm,  $t_{\text{R}1} = 11.5$  min,  $t_{\text{R}2} = 17.1$  min;  $[\alpha]_{\text{D}}^{25} + 23$  ( $c = 0.89$ ,  $\text{CHCl}_3$ ).

### 1-(2-hydroxyphenyl)-2-methyl-4,4-bis(phenylthio)butan-1-one (3ai)

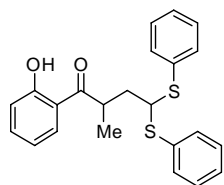

(Table 3, entry 8) The title compound was prepared from salicylaldehyde **1a** (0.2 mmol) and **2i** (0.3 mmol) according to Method A using 0.005 mmol (2.5 mol %)  $[\text{Rh}(\text{COD})\text{Cl}]_2$ , 0.01 mmol (5 mol %) (*R*)-SIPHOS-PE and 0.01 mmol (5 mol %)  $\text{K}_3\text{PO}_4$ . Purification via preparative TLC (3% ethyl acetate

in hexanes) afforded the product as a pale yellow oil (74.7 mg, 95%).  $^1\text{H}$  NMR (400 MHz,  $\text{CDCl}_3$ )  $\delta$  1.19 (d,  $J = 7.0$  Hz, 3H), 1.92 (ddd,  $J = 14.2, 8.3, 5.7$  Hz, 1H), 2.51 (ddd,  $J = 14.5, 7.9, 6.6$  Hz, 1H), 3.99-4.08 (m, 1H), 4.38 (dd,  $J = 8.3, 6.6$  Hz, 1H), 6.86 (ddd,  $J = 8.2, 7.2, 1.2$  Hz, 1H), 6.97 (dd,  $J = 8.5, 1.2$  Hz, 1H), 7.21-7.36 (m, 8H), 7.43-7.48 (m, 3H), 7.79 (dd,  $J = 8.1, 1.6$  Hz, 1H), 12.36 (s, 0.8H);  $^{13}\text{C}$  NMR (100 MHz  $\text{CDCl}_3$ )  $\delta$  18.4, 38.3, 39.6, 56.5, 118.6, 118.8, 119.2, 127.9, 128.1, 129.1, 129.1, 130.1, 132.5, 133.0, 133.5, 134.0, 136.7, 163.3, 209.3; IR (neat): 2970, 1634, 1581, 1482, 1439, 1379, 1348, 1295, 1240, 1208, 1157, 1111, 1067, 1025, 973, 908, 827, 751, 691  $\text{cm}^{-1}$ ; HRMS (EI) Calcd. for  $[\text{C}_{23}\text{H}_{22}\text{O}_2\text{S}_2]^+$  394.1061, found 394.1057. HPLC analysis: 95% ee (CHIRALCEL OJ-H), 10:90 isopropanol:hexanes, 1.0 mL/min, 254 nm,  $t_{\text{R}1} = 15.1$  min,  $t_{\text{R}2} = 23.4$  min;  $[\alpha]_{\text{D}}^{26} \square 2$  ( $c = 1.0$ ,  $\text{CHCl}_3$ ).

### 1-(2-hydroxyphenyl)-2-(2-(phenylthio)ethyl)pentan-1-one (7)

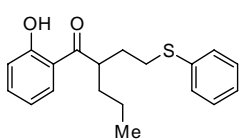

**With (*E*)-olefin 5:** The title compound was prepared from salicylaldehyde **1a** (0.2 mmol) and **5** (0.3 mmol) according to Method A using 0.01 mmol (5 mol %)  $[\text{Rh}(\text{COD})\text{Cl}]_2$ , 0.02 mmol (10 mol %) (*R*)-SIPHOS-PE, 0.04 mmol (0.2 equiv)  $\text{K}_3\text{PO}_4$  and heating at 40  $^\circ\text{C}$ . Purification via preparative TLC (16:1 hexanes:ethyl acetate) afforded the product as a clear oil (44.8 mg, 71%).  $^1\text{H}$  NMR (400 MHz,  $\text{CDCl}_3$ )  $\delta$  0.88 (t,  $J = 7.3$  Hz, 3H), 1.26-1.33 (m, 2H), 1.44-1.54 (m, 1H), 1.71-1.87 (m, 2H), 2.19 (dtd,  $J = 14.1, 7.9, 6.2$  Hz, 1H), 2.80-2.87 (m, 1H), 2.97 (ddd,  $J = 13.7, 7.8, 6.1$  Hz, 1H), 3.69-3.76 (m, 1H), 6.86-6.90 (m, 1H), 6.99 (dd,  $J = 8.4, 0.9$ , 1H), 7.14-7.18 (m, 1H), 7.24-7.31 (m, 4H), 7.48 (ddd,  $J = 8.5, 7.4, 1.6$  Hz, 1H), 7.80 (dd,  $J = 8.1, 1.5$  Hz, 1H), 12.59 (s, 0.8H);  $^{13}\text{C}$  NMR (100 MHz,  $\text{CDCl}_3$ )  $\delta$  14.3, 20.7, 31.3, 31.7, 34.9, 44.0, 118.8, 119.1, 119.5, 126.2, 129.1, 129.3, 130.1, 136.0, 136.7, 163.2, 210.0; COSY (see below); IR (neat): 3063, 2957, 2927, 2871, 1633, 1581, 1483, 1444, 1383, 1348, 1292, 1241, 1203, 1155, 1025, 807, 739, 691  $\text{cm}^{-1}$ ; HRMS (EI) Calcd. for  $[\text{C}_{19}\text{H}_{22}\text{O}_2\text{S}]^+$  314.1341, found 314.1339. HPLC analysis: 90% ee (CHIRALCEL OD-H), 1:99 isopropanol:hexanes, 1.0 mL/min, 254 nm,  $t_{\text{R}1} = 7.5$  min,  $t_{\text{R}2} = 8.2$  min;  $[\alpha]_{\text{D}}^{27} + 52$  ( $c = 1.0$ ,  $\text{CHCl}_3$ ).

**With (*Z*)-olefin 6:** Purification via preparative TLC (hexanes:ethyl acetate) afforded the product as a clear yellow oil (52.7 mg, 84%). HPLC analysis: 90% ee (CHIRALCEL OD-H), 1:99 isopropanol:hexanes, 0.5 mL/min, 254 nm,  $t_{\text{R}1} = 7.5$  min,  $t_{\text{R}2} = 8.2$  min;  $[\alpha]_{\text{D}}^{27} + 53$  ( $c = 1.0$ ,  $\text{CHCl}_3$ ).



As noted in the manuscript, both (*E*)-olefin **5** and (*Z*)-olefin **6** underwent hydroacylation to give the same enantiomer of **7**. The hydroacylation also proceeds with the nearly same ee (within detection limits), which was reported as 90 % for both entries. Based on our current data, we can provide two reasonable preliminary rationales for this outcome: (1) The relative disposition of the substituents (ie. (*E*) or (*Z*)) on the olefin does not significantly affect the enantioselective outcome. In this scenario, the catalyst is nearly equally selective for installing the acyl unit at the olefin carbon closest to the sulfur, with the observed sense of enantioinduction, regardless of whether the ethyl substituent on the other carbon of the olefin is *cis* or *trans*. (2) The rate of hydroacylation of one of the olefin stereoisomers is much faster than the other. In this case, a (*E*)/(*Z*) isomerization that is fast compared to hydroacylation of the less reactive isomer would also have to take place. This would likely occur via a rapid and reversible olefin insertion step, which would scramble the original olefin geometry. The more reactive isomer would undergo hydroacylation and the same enantioselectivity would be observed, regardless of the initial stereochemistry of the olefin.

#### 1-(2-hydroxyphenyl)-4-(phenylthio)butan-1-one (**9**)

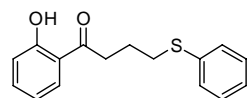

**With (*R*)-MonoPhos:** The title compound was prepared from salicylaldehyde **1a** (0.2 mmol) and **8** (0.3 mmol) according to Method A using 0.01 mmol (5 mol %) [Rh(COD)Cl]<sub>2</sub>, 0.02 mmol (10 mol %) (*R*)-MonoPhos, and 0.04 mmol (0.2 equiv) K<sub>3</sub>PO<sub>4</sub> at 40 °C. Purification via preparative TLC (30:1 hexanes:ethyl acetate) afforded the product as an oil (41.6 mg, 76%). <sup>1</sup>H NMR (400 MHz, CDCl<sub>3</sub>) δ 2.10 (quintet, *J* = 7.0 Hz, 2H), 3.05 (t, *J* = 6.9 Hz, 2H), 3.18 (t, *J* = 7.1 Hz, 2H), 6.88 (ddd, *J* = 8.4, 7.3, 1.1, 1H), 6.98 (dd, *J* = 8.4, 1.1, 1H), 7.16-7.21 (m, 1H), 7.27-7.31 (m, 2H), 7.35-7.38 (m, 2H), 7.46 (ddd, *J* = 8.6, 7.3, 1.6, 1H), 7.73 (dd, *J* = 8.1, 1.6, 1H), 12.59 (s, 0.9H); <sup>13</sup>C NMR (75 MHz, CDCl<sub>3</sub>) δ 23.5, 33.3, 36.8, 118.7, 119.1, 119.4, 126.3, 129.1, 129.5, 130.0, 136.0, 136.5, 162.6, 205.8; IR (neat): 2920, 1637, 1614, 1581, 1482, 1446, 1352, 1294, 1271, 1239, 1209, 1157, 1089, 1025, 982, 754, 691 cm<sup>-1</sup>; HRMS (EI) Calcd. for [C<sub>16</sub>H<sub>16</sub>O<sub>2</sub>S]<sup>+</sup> 272.0871, found 272.0868.

**With (*R*)-SIPHOS-PE:** The title compound was prepared from salicylaldehyde **1a** (0.2 mmol) and **8** (0.3 mmol) according to Method A using 0.01 mmol (5 mol %) [Rh(COD)Cl]<sub>2</sub>, 0.02

mmol (10 mol %) (*R*)-SIPHOS-PE, and 0.04 mmol (0.2 equiv) K<sub>3</sub>PO<sub>4</sub> at 40 °C. Purification via preparative TLC (30:1 hexanes:ethyl acetate) afforded the product as an oil (42.1 mg, 77%)

***Intermolecular hydroacylation with analogue of 2a lacking sulfur atom:***

**pent-4-en-1-ylbenzene**

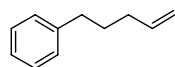

To a flame dried flask equipped with a stirbar and magnesium turnings (533 mg, 22 mmol) under argon, was added 50 mL dry tetrahydrofuran. The mixture was cooled to 0 °C and (2-bromoethyl)benzene (3.70g, 20 mmol) was added dropwise via syringe, followed by heating at reflux for 1 h. The reaction was cooled to rt and allyl bromide (2.90g, 24 mmol) was added dropwise via syringe, followed by heating at reflux for 2 h. The crude reaction mixture was then quenched with sat. NH<sub>4</sub>Cl and extracted with diethyl ether. The organics were washed with brine, dried over MgSO<sub>4</sub>, filtered, and concentrated *in vacuo*. The desired product was isolated via flash chromatography (hexanes) as a clear oil (1.52 g, 52%). NMR analysis was consistent with literature values.<sup>8</sup> <sup>1</sup>H NMR (400 MHz, CDCl<sub>3</sub>) δ 1.63-1.77 (m, 2H), 2.00-2.13 (m, 2H), 2.60 (t, *J* = 7.7 Hz, 2H), 4.84-5.13 (m, 2H), 5.81 (ddt, *J* = 16.9, 10.2, 6.6 Hz, 1H), 7.08-7.30 (m, 5H); <sup>13</sup>C NMR (100 MHz, CDCl<sub>3</sub>) δ 30.8, 33.4, 35.5, 114.8, 125.8, 128.4, 128.6, 138.8, 142.6.

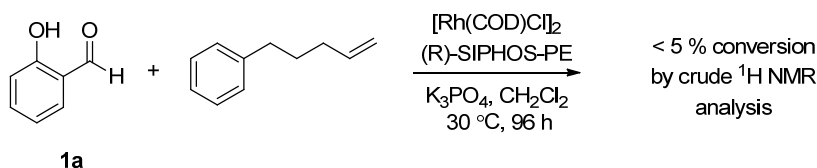

The above reaction was carried out with salicylaldehyde **1a** (0.1 mmol) and **pent-4-en-1-ylbenzene** (0.15 mmol, 1.5 equiv.) according to Method A using 0.005 mmol (5 mol %) [Rh(COD)Cl]<sub>2</sub>, 0.01 mmol (10 mol %) (*R*)-SIPHOS-PE and 0.02 mmol (0.2 equiv.) K<sub>3</sub>PO<sub>4</sub>.

**Preparation of racemic samples:**

Racemic samples of **3aa-3ha**, **3ab-3ai** and **7** were prepared via modifications of conditions developed by Suemune.<sup>9</sup> General procedure: 0.005 mmol (5 mol %) Rh(PPh<sub>3</sub>)<sub>3</sub>Cl was

<sup>8</sup> Movassaghi, M.; Ahmad, O. K. *Angew. Chem., Int. Ed.* **2008**, 47, 8909.

<sup>9</sup> Imai, M.; Tanaka, M.; Tanaka, K.; Yamamoto, Y.; Imai-Ogata, N.; Shimowatari, M.; Nagumo, S.; Kawahara, N.; Suemune, H. *J. Org. Chem.* **2004**, 69, 1144.

dissolved in 400  $\mu\text{L}$  degassed dichloromethane and 40  $\mu\text{L}$  ethanol. The solution was transferred to a vial containing 0.005 mmol (5 mol %)  $\text{AgClO}_4$  and the mixture was stirred for 15 minutes, then transferred to a vial containing 0.02 mmol (0.2 eq)  $\text{NaOAc}$ . 0.15 mmol (1.5 equiv) of the corresponding olefin was dissolved in 400  $\mu\text{L}$  degassed dichloromethane and transferred to the reaction mixture. 0.1 mmol (1.0 equiv) of the salicylaldehyde derivative was added via syringe or in solution with the olefin. The reaction was stirred at ambient glovebox temperature (30  $^{\circ}\text{C}$ ) or 40  $^{\circ}\text{C}$  [at the same temperature as the corresponding enantioselective reaction using (*R*)-SIPHOS-PE was performed] until complete conversion or no further reaction was observed by GC/MS analysis. The crude reaction mixture was purified via thin layer chromatography in hexanes/ethyl acetate.

**Preliminary comparison of reactivities of heteroatom-based directing groups in intermolecular hydroacylation:**

Reactions with  $\text{Rh}(\text{PPh}_3)_3\text{Cl}$  were performed according to the general procedure outlined for the preparation of racemic samples, above. Entry 3 was performed according to *General Procedure A* (see page S 12).

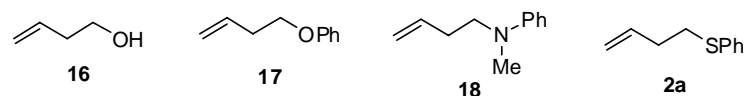

| Entry          | Catalyst                                                       | Olefin    | Time | Conversion <sup>b</sup>                                   |
|----------------|----------------------------------------------------------------|-----------|------|-----------------------------------------------------------|
| 1              | $\text{Rh}(\text{PPh}_3)_3\text{Cl}$                           | <b>16</b> | 3 d  | none                                                      |
| 2 <sup>c</sup> | $\text{Rh}(\text{PPh}_3)_3\text{Cl}$                           | <b>17</b> | 2 d  | none                                                      |
| 3 <sup>d</sup> | $[\text{Rh}(\text{COD})\text{Cl}]_2/$<br>( <i>R</i> )-MonoPhos | <b>17</b> | 3d   | trace                                                     |
| 4 <sup>e</sup> | $\text{Rh}(\text{PPh}_3)_3\text{Cl}$                           | <b>18</b> | 4 d  | trace                                                     |
| 5              | $\text{Rh}(\text{PPh}_3)_3\text{Cl}$                           | <b>2a</b> | 4 h  | >95 % (17:1 selectivity for <b>3aa:4aa</b> ) <sup>f</sup> |

Table 2. <sup>a</sup> Conditions: salicylaldehyde **1a** (1.0 equiv), olefin (1.5 equiv),  $\text{Rh}(\text{PPh}_3)_3\text{Cl}$  (5 mol %),  $\text{AgClO}_4$  (5 mol %),  $\text{NaOAc}$  (0.2 equiv.),  $\text{CH}_2\text{Cl}_2/\text{EtOH}$ , 30  $^{\circ}\text{C}$ . <sup>b</sup> Determined via  $^1\text{H}$  NMR or LC/MS analysis. <sup>c</sup> Using 1.0 equiv. of **17**. <sup>d</sup> Conditions: salicylaldehyde **1a** (1.0 equiv), olefin **17** (1.5 equiv),  $[\text{Rh}(\text{COD})\text{Cl}]_2$  (5 mol %), (*R*)-MonoPhos (10 mol %),  $\text{K}_3\text{PO}_4$  (10 mol %),  $\text{CH}_2\text{Cl}_2$ , 30  $^{\circ}\text{C}$ . <sup>e</sup> Using  $\text{PhMe}/\text{EtOH}$  at 100  $^{\circ}\text{C}$ . <sup>f</sup> Determined via  $^1\text{H}$  NMR analysis of crude reaction mixture.

#### 4. Determination of Enantiomeric Excesses: HPLC Analyses

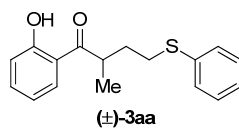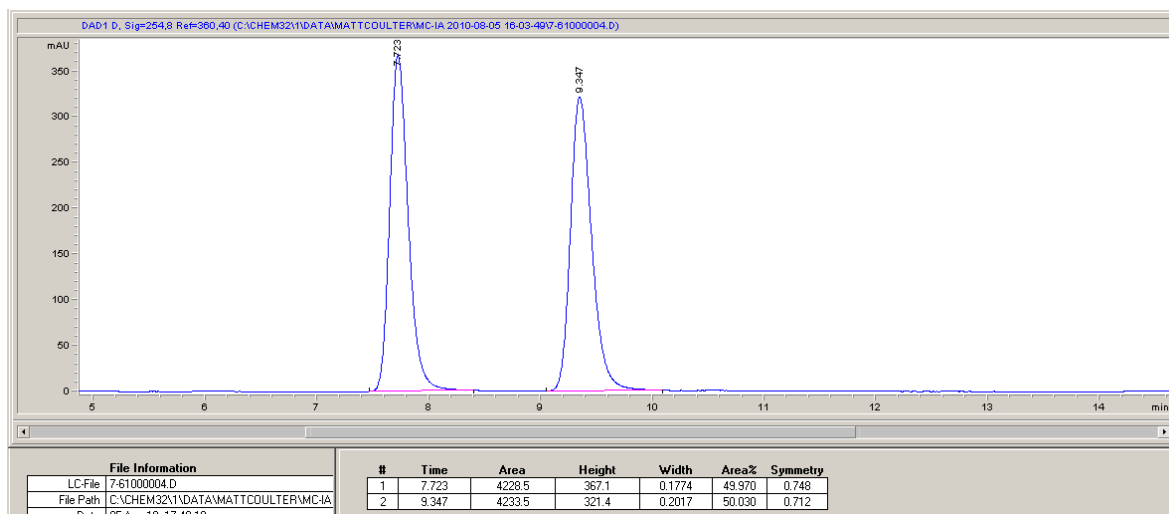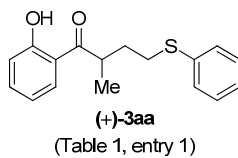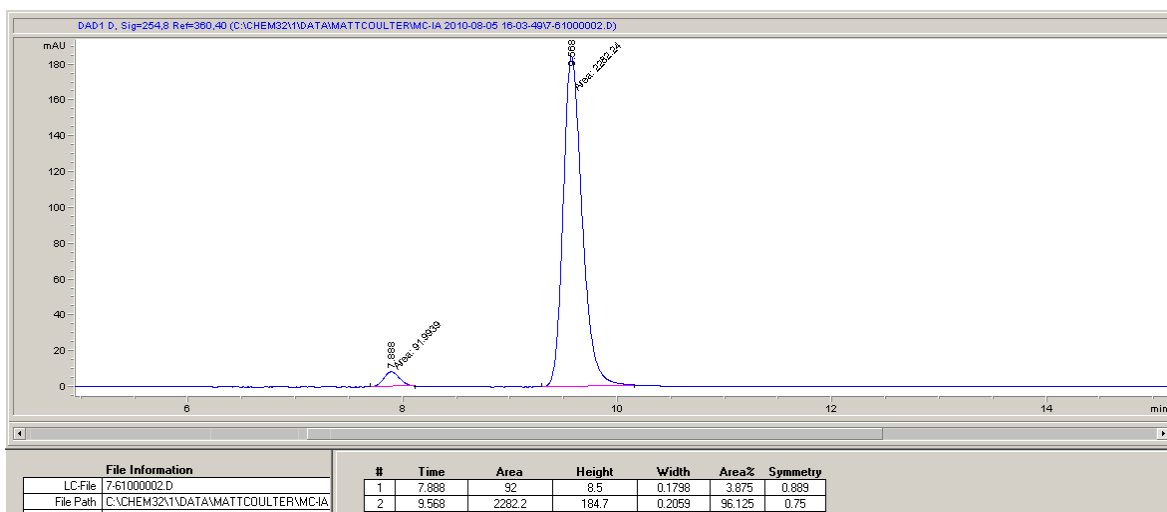

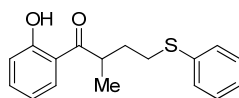**(+)-3aa**With 5 mol % AgClO<sub>4</sub>

(Table 1, entry 2)

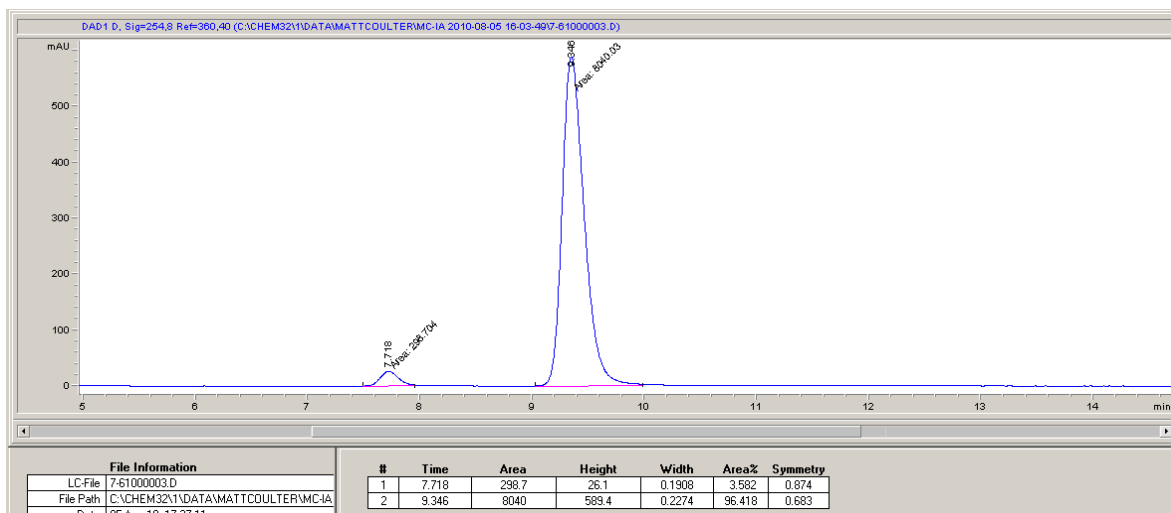

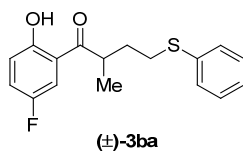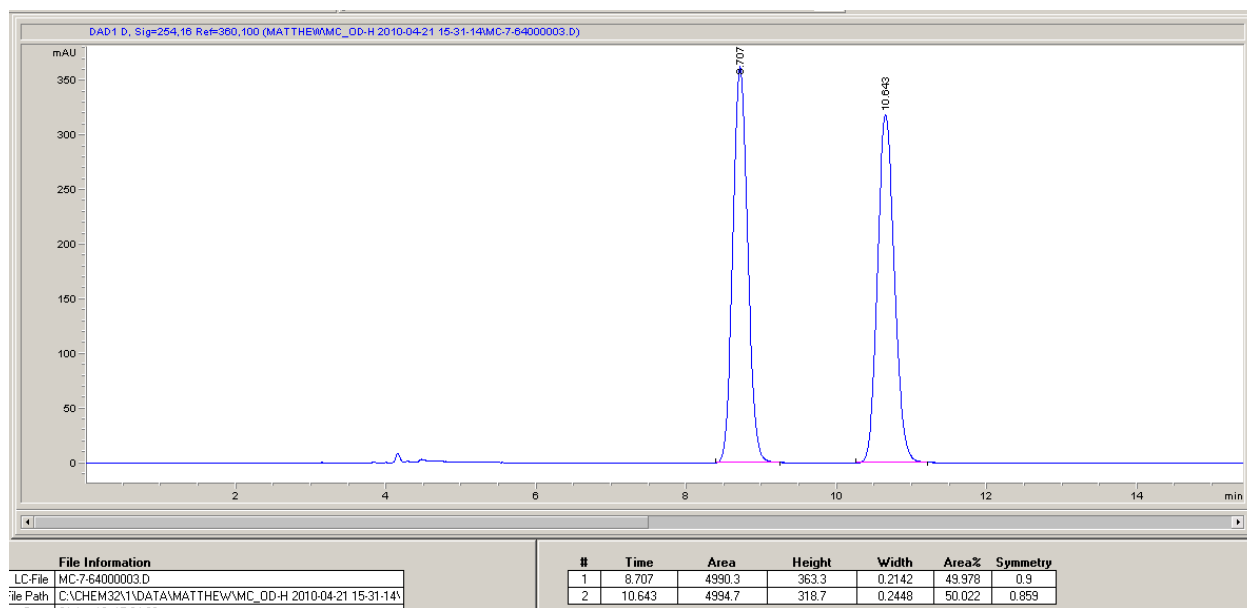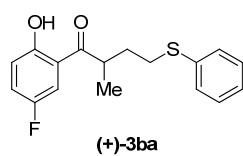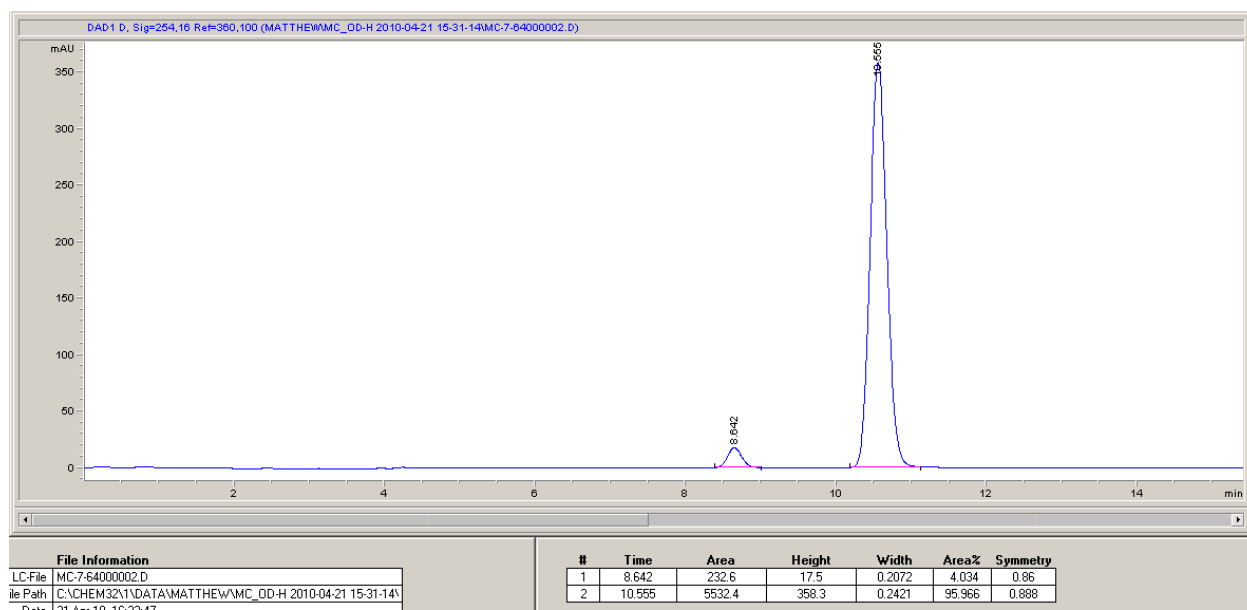

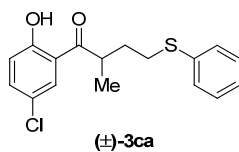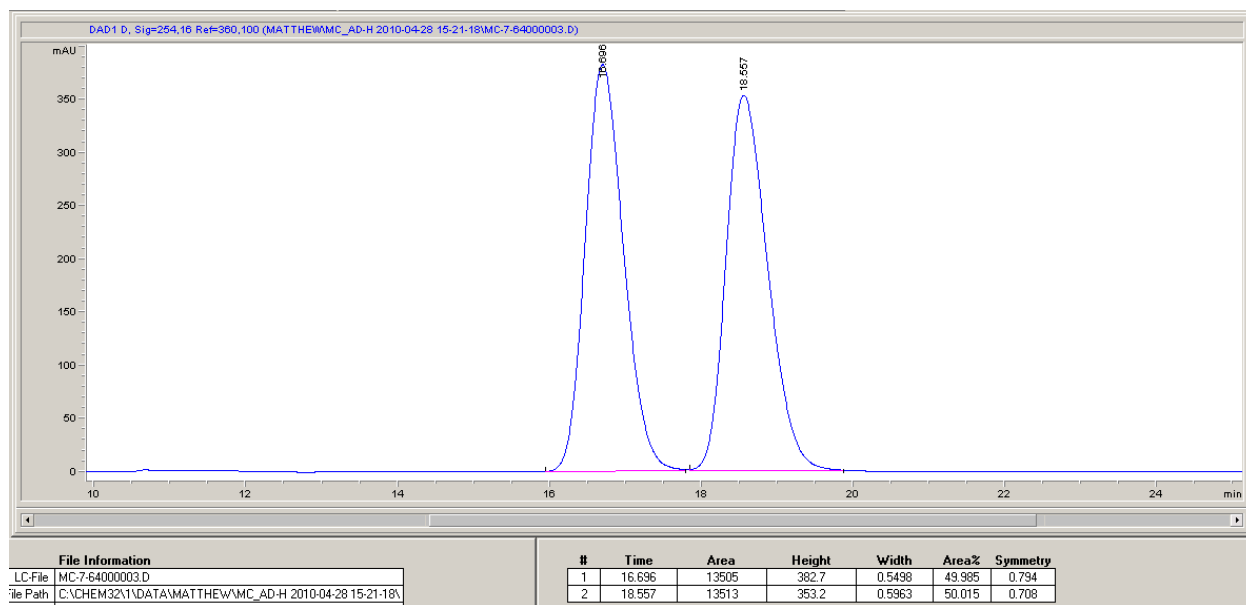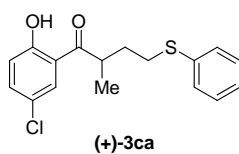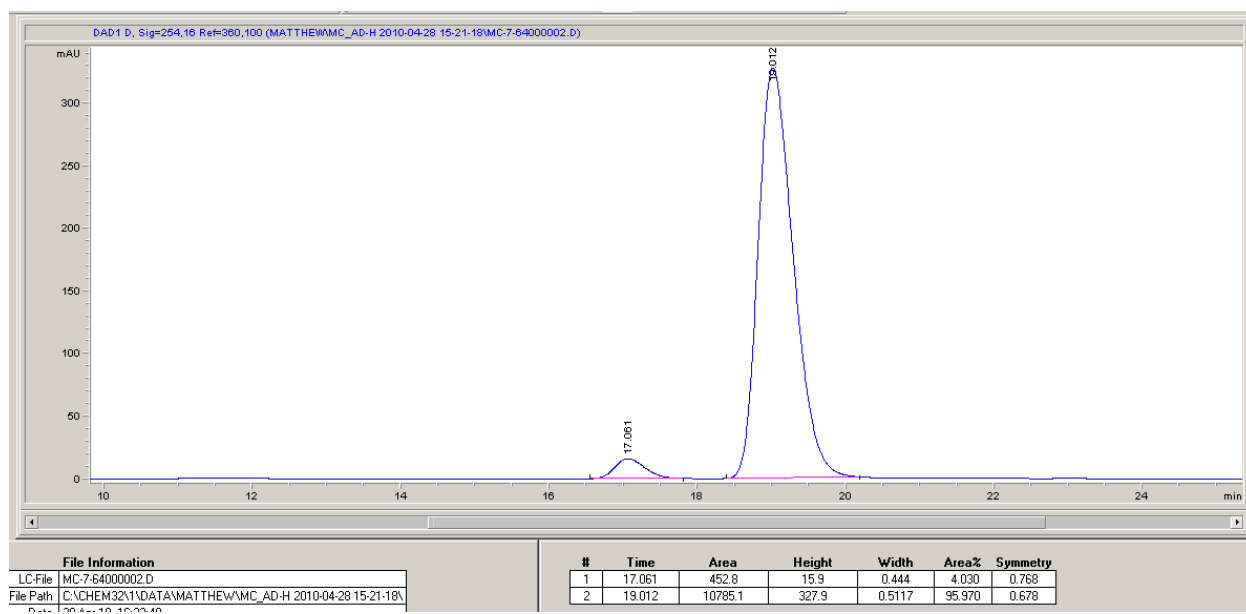

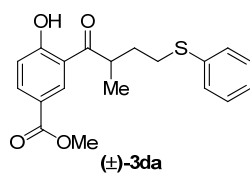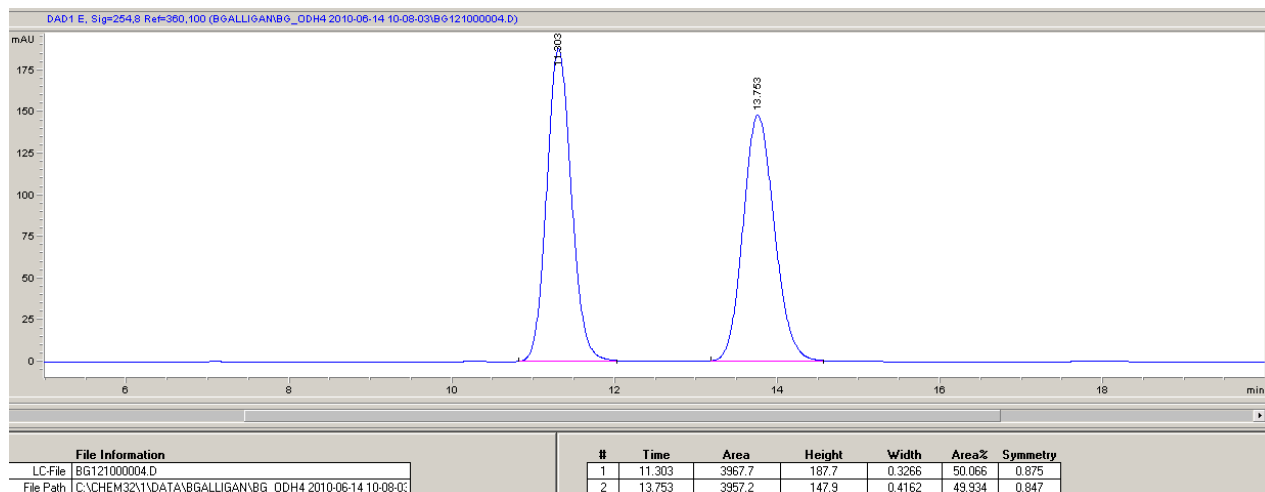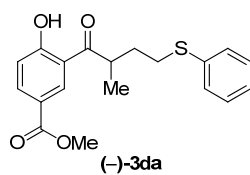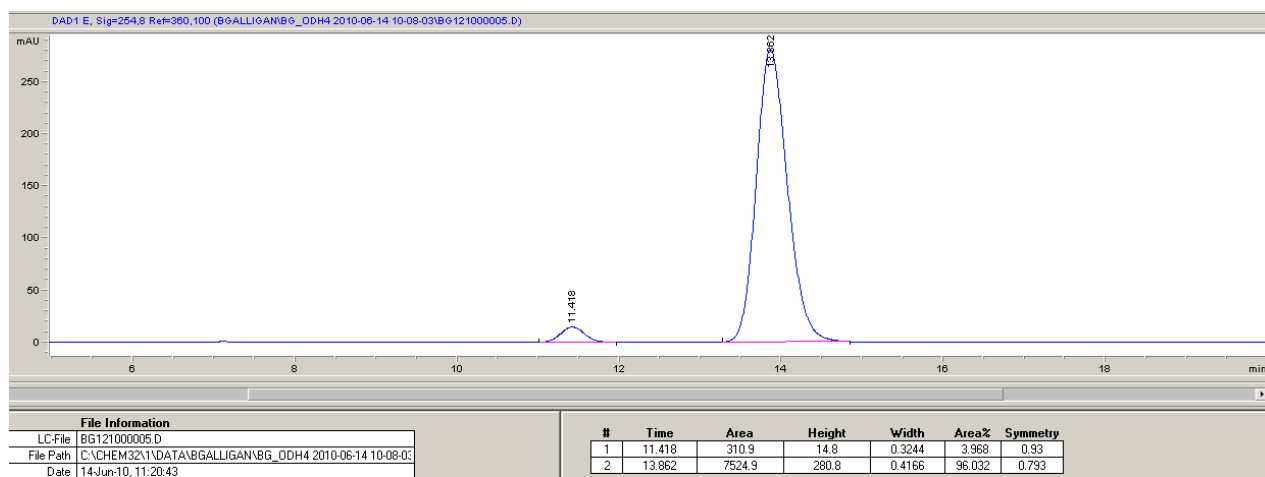



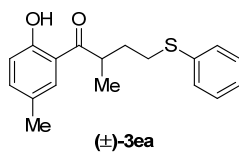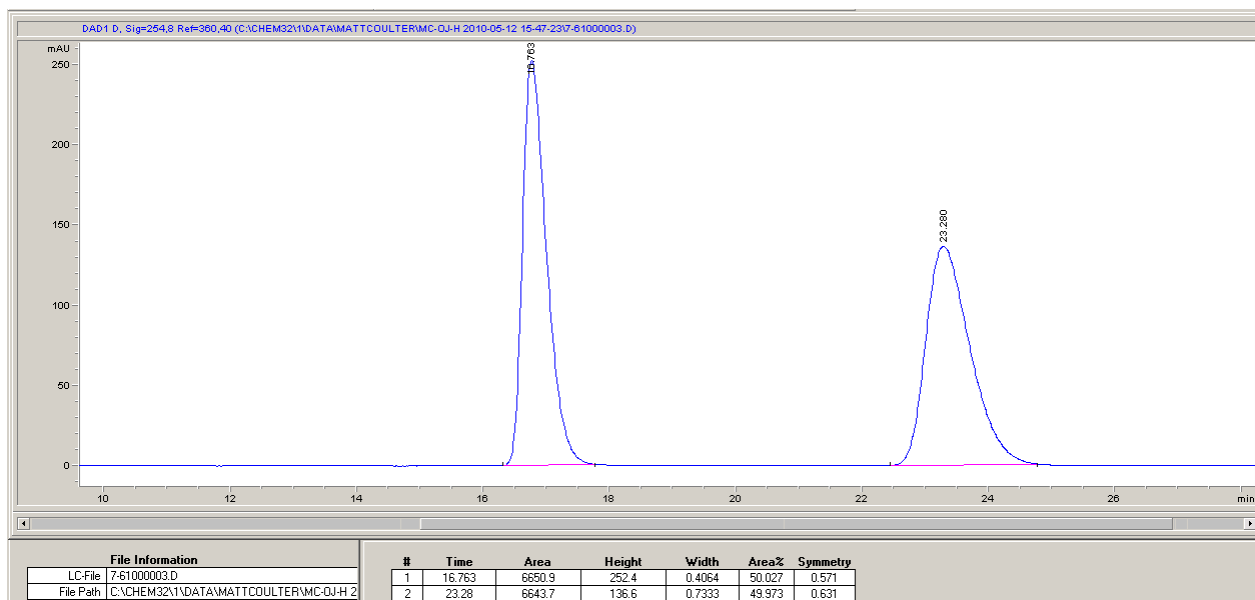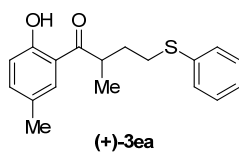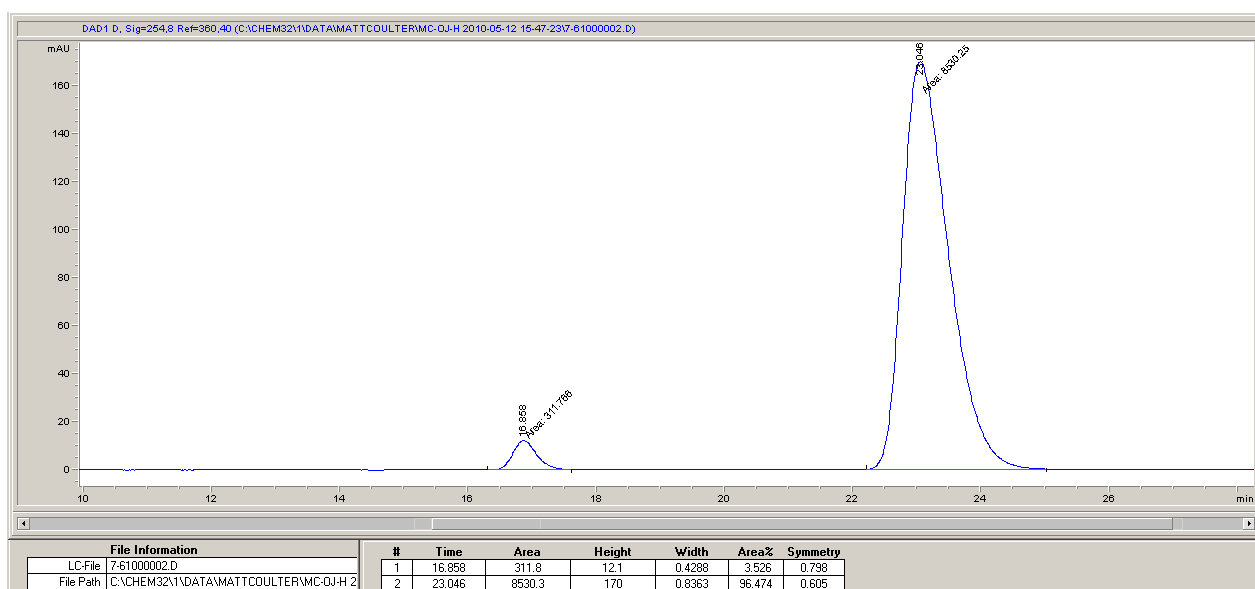

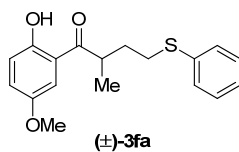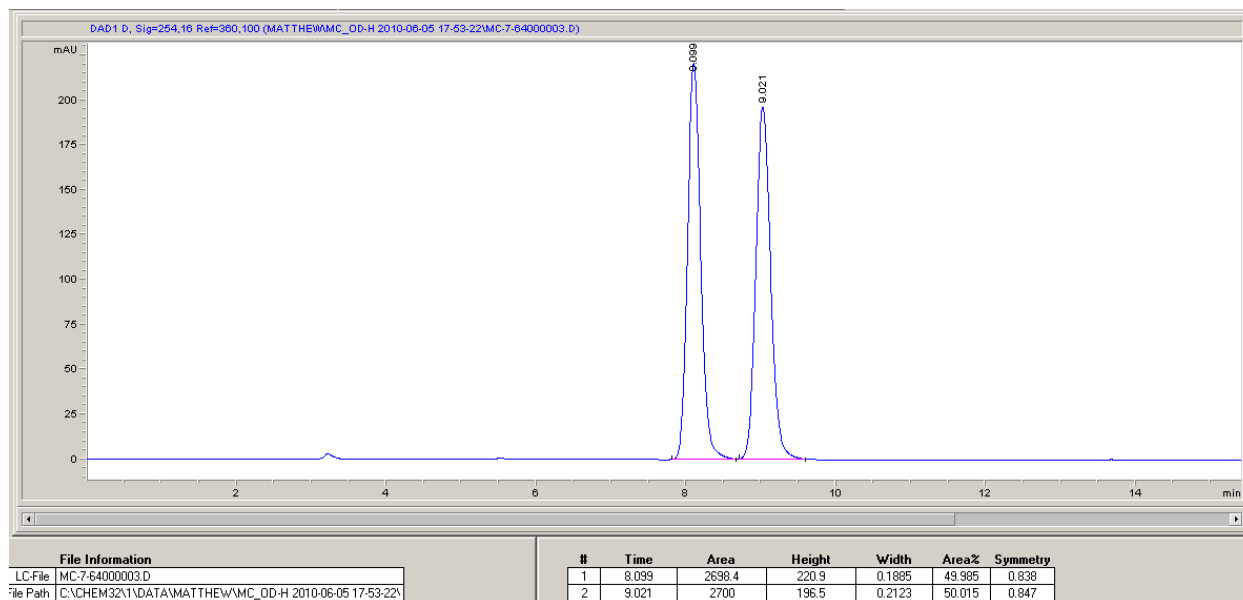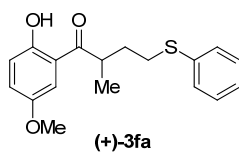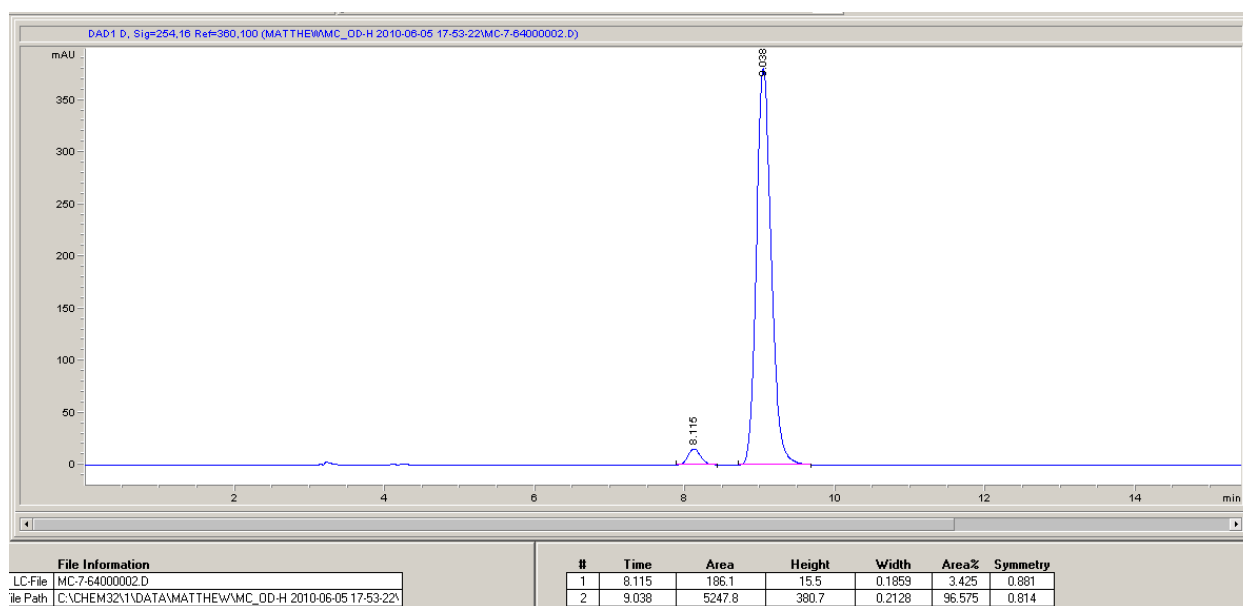

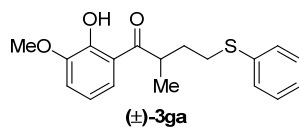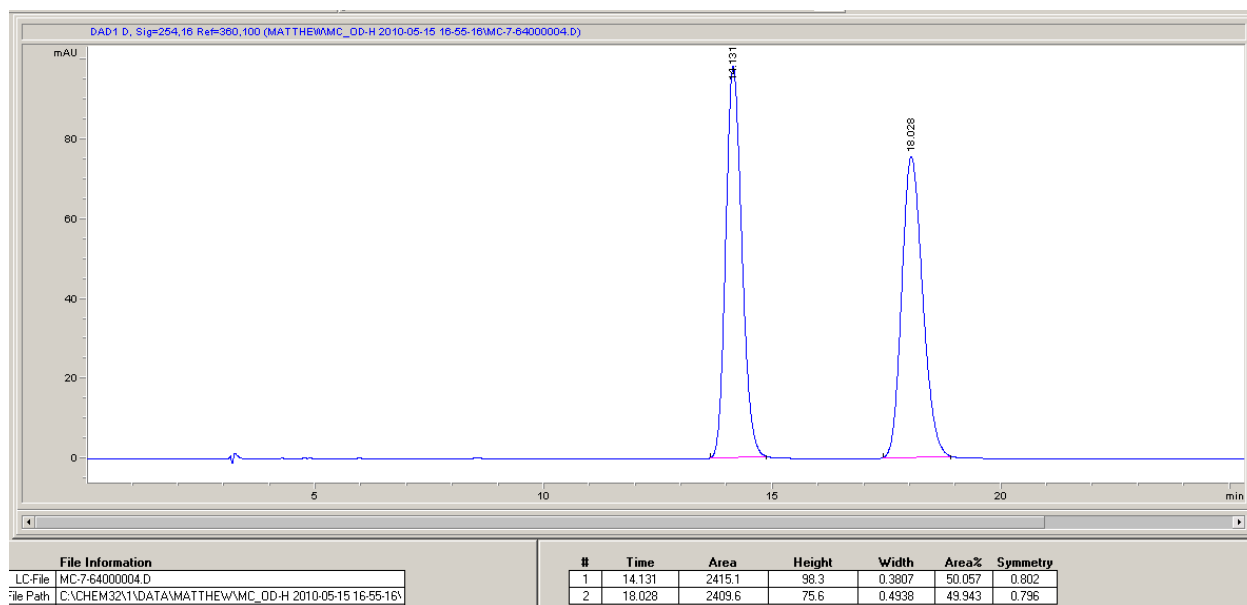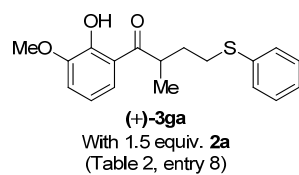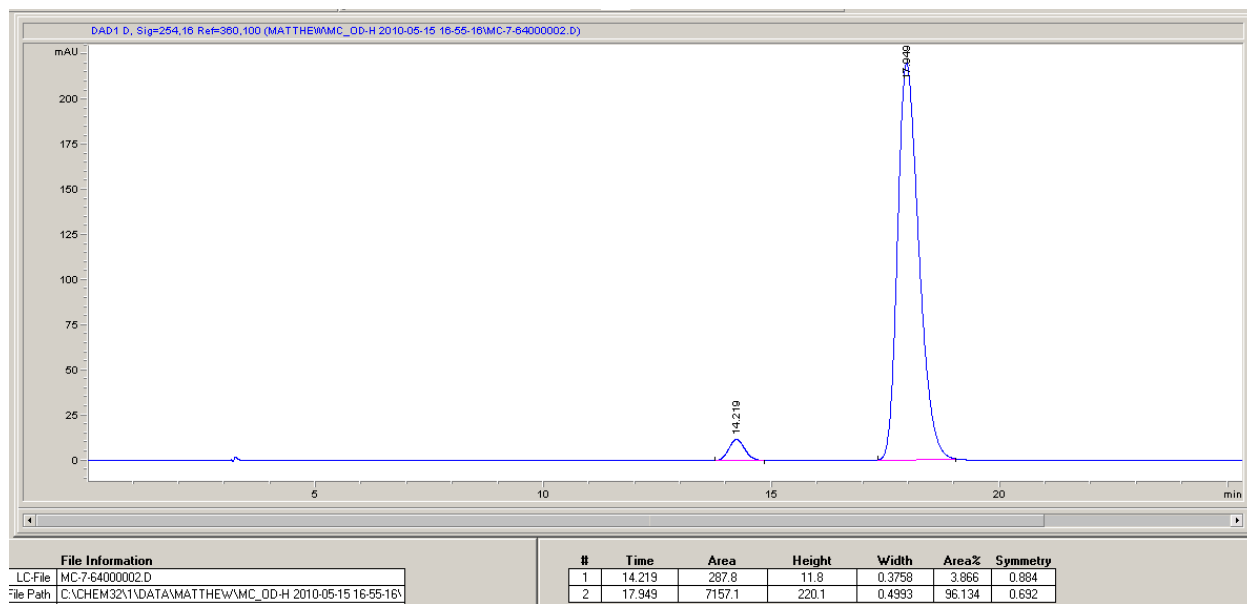

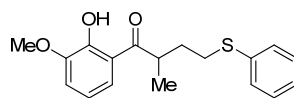

(+)-3ga  
With 2.0 equiv. 2a  
(Table 2, entry 9)

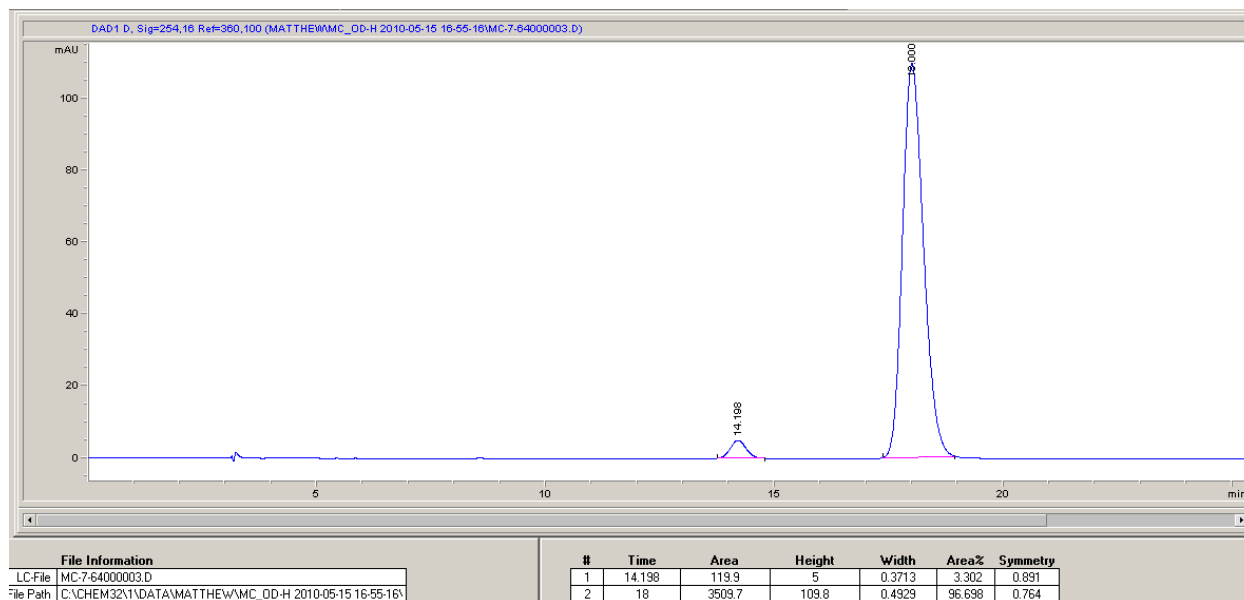

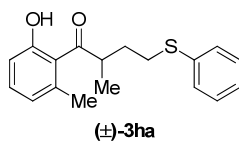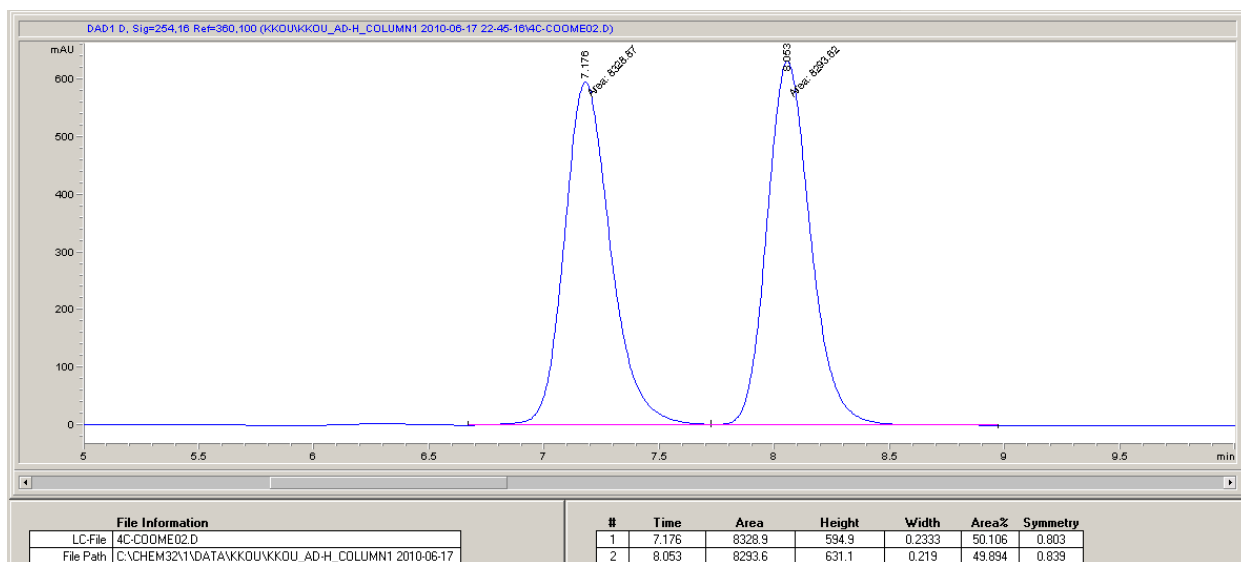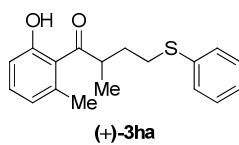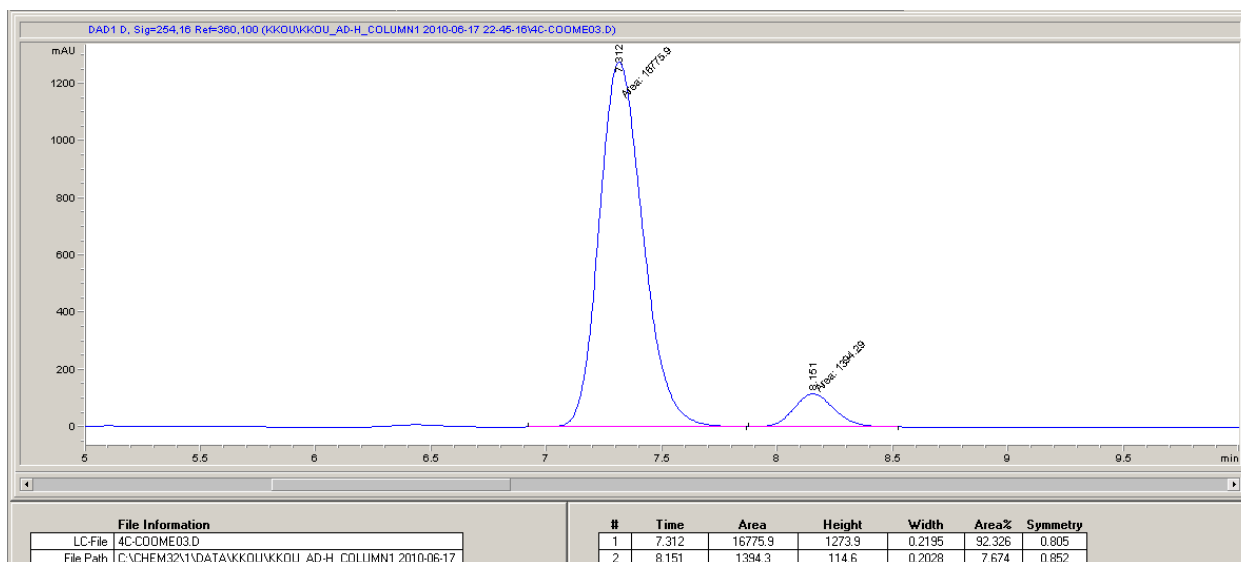

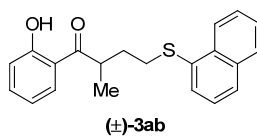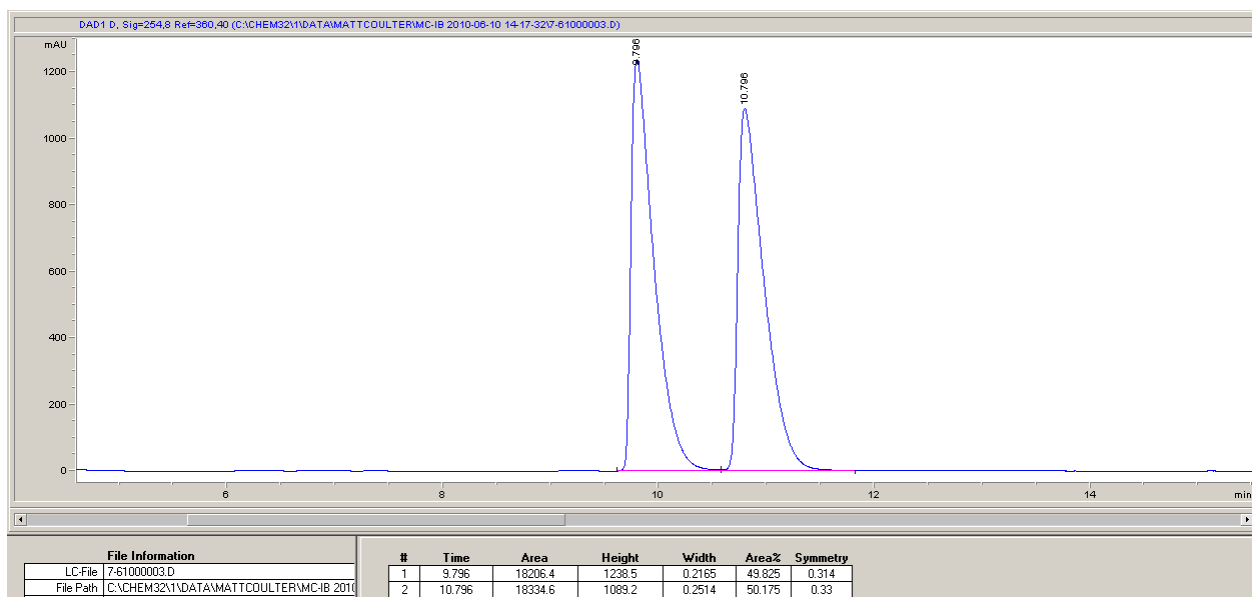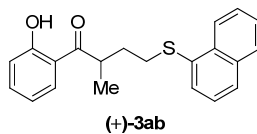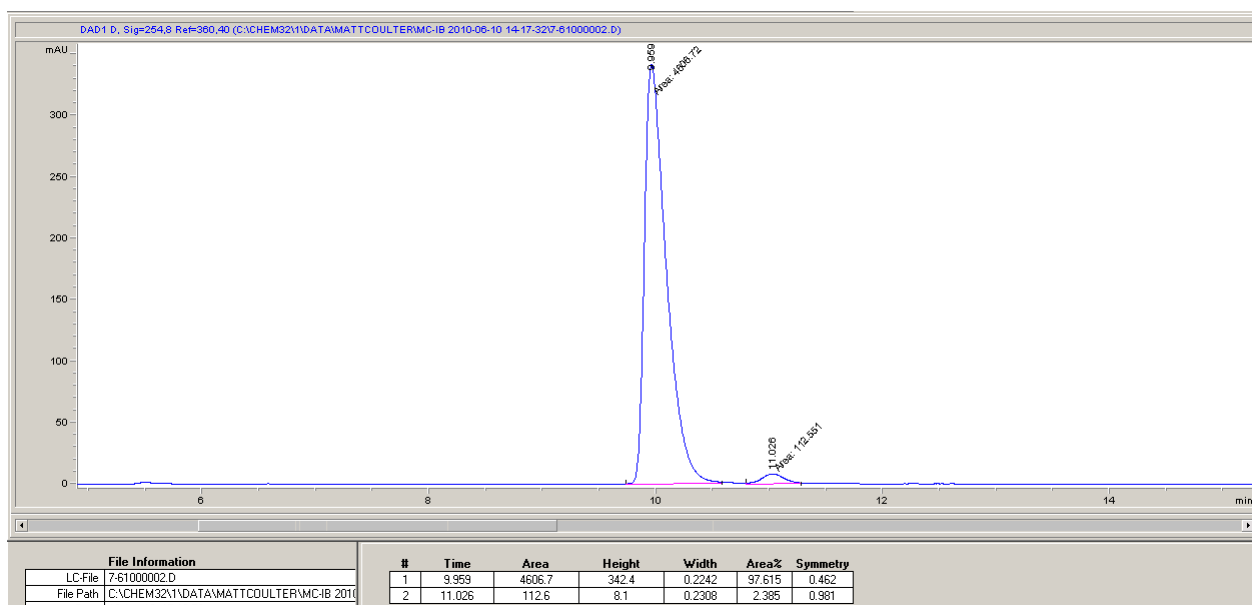

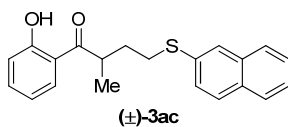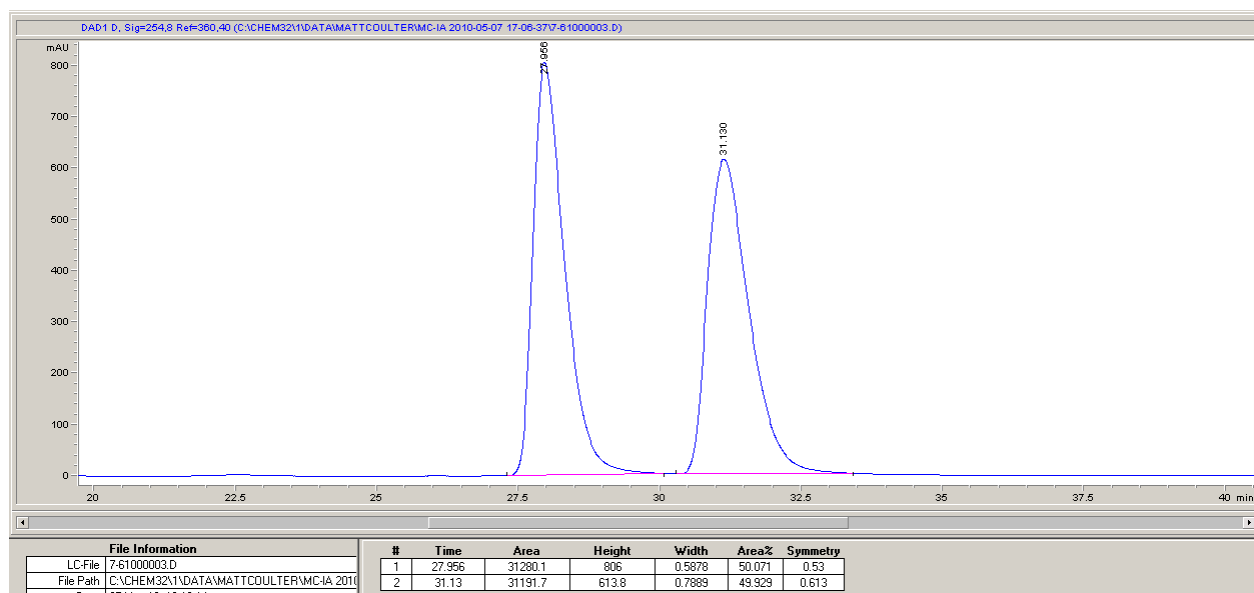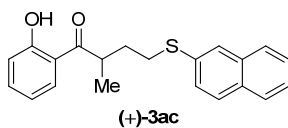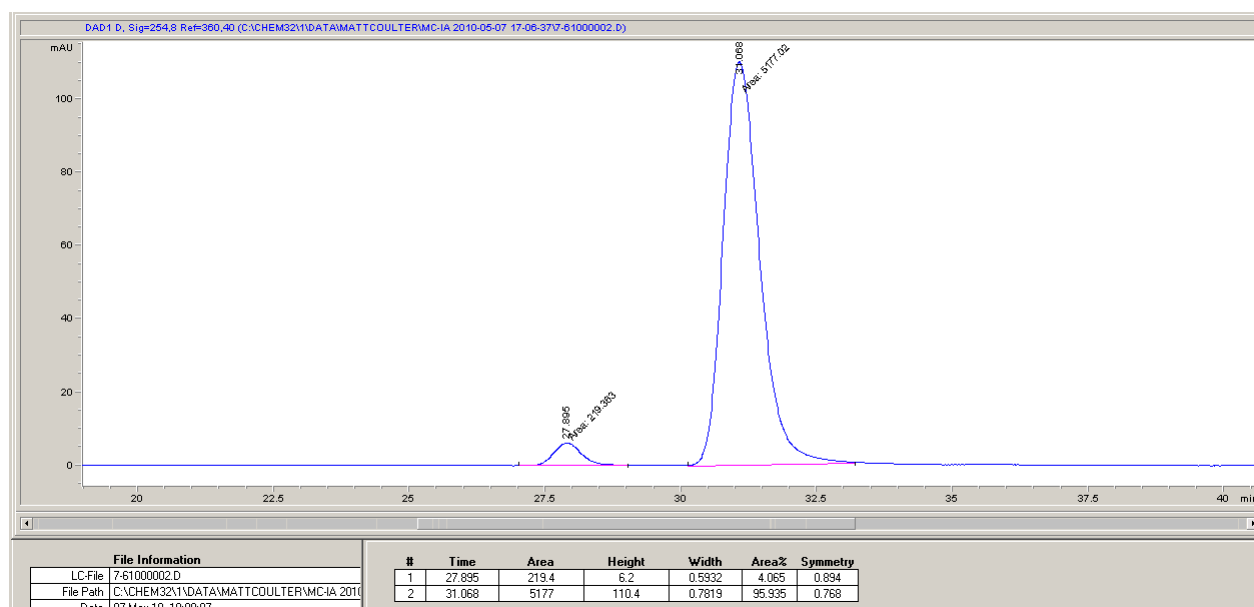

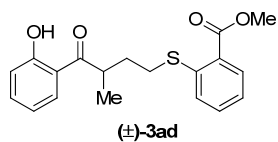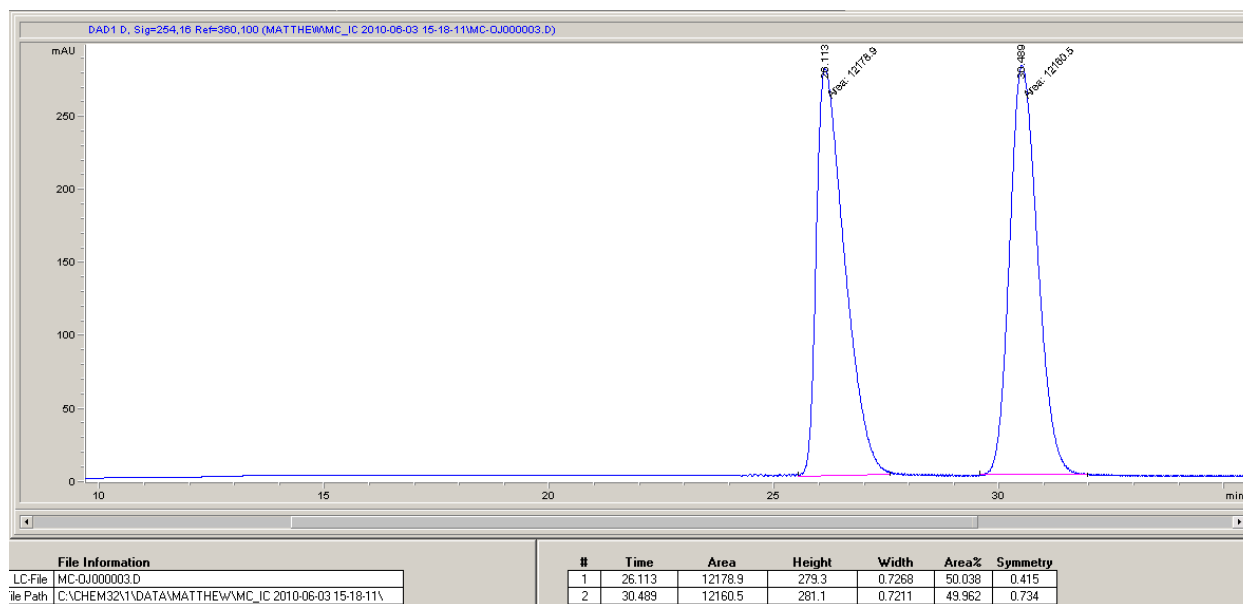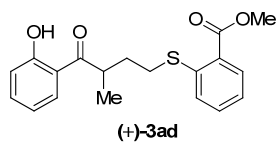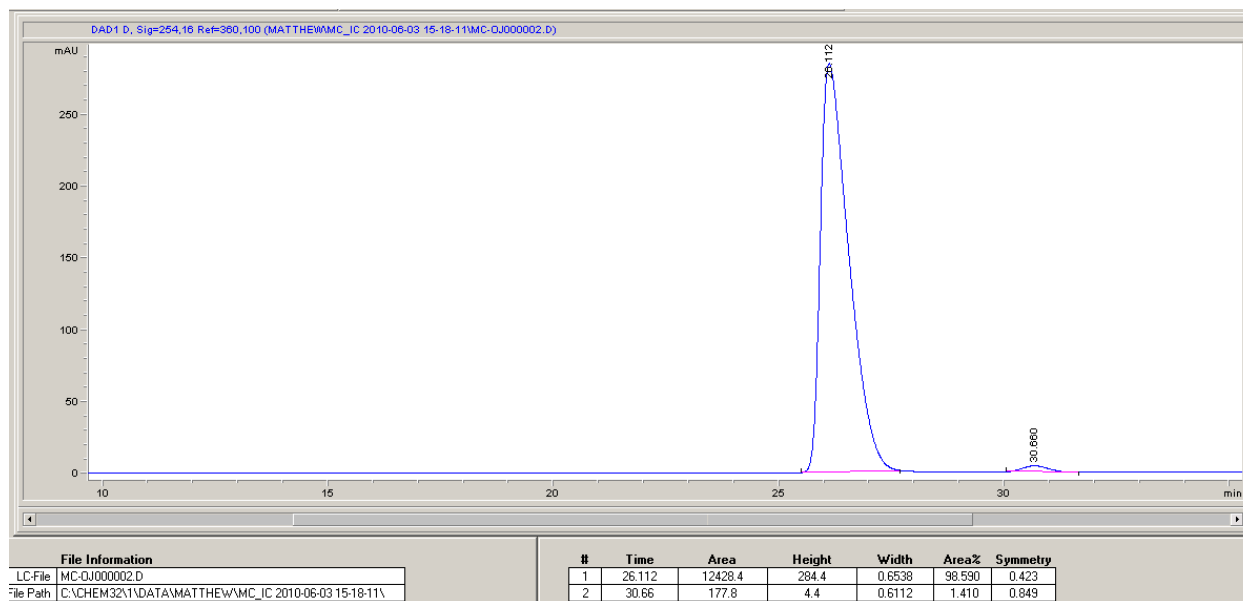



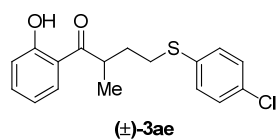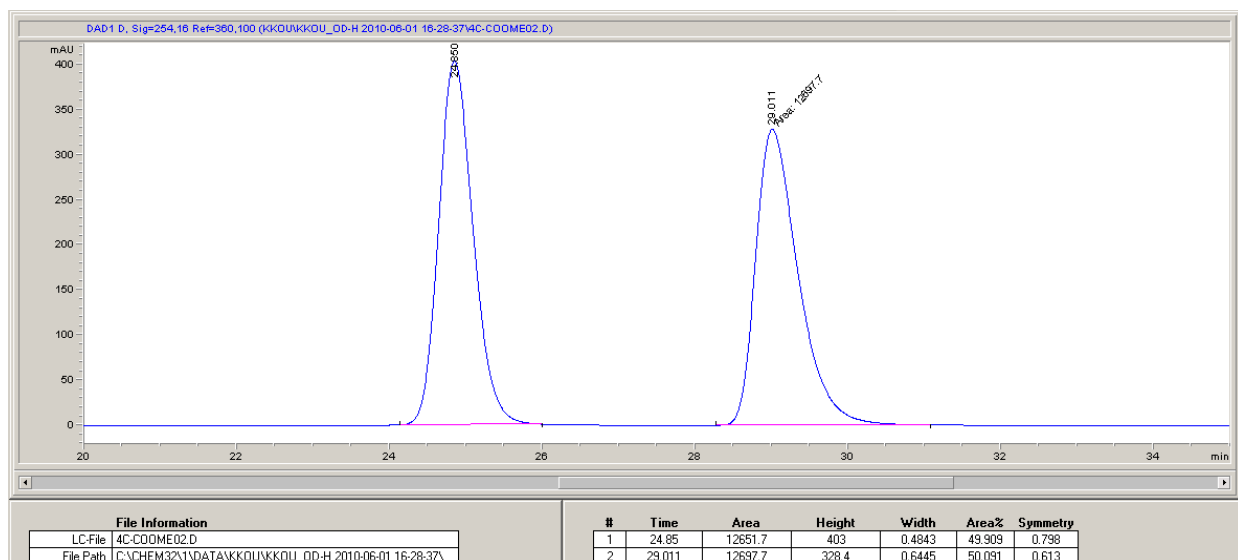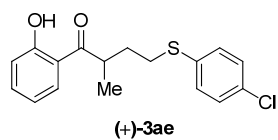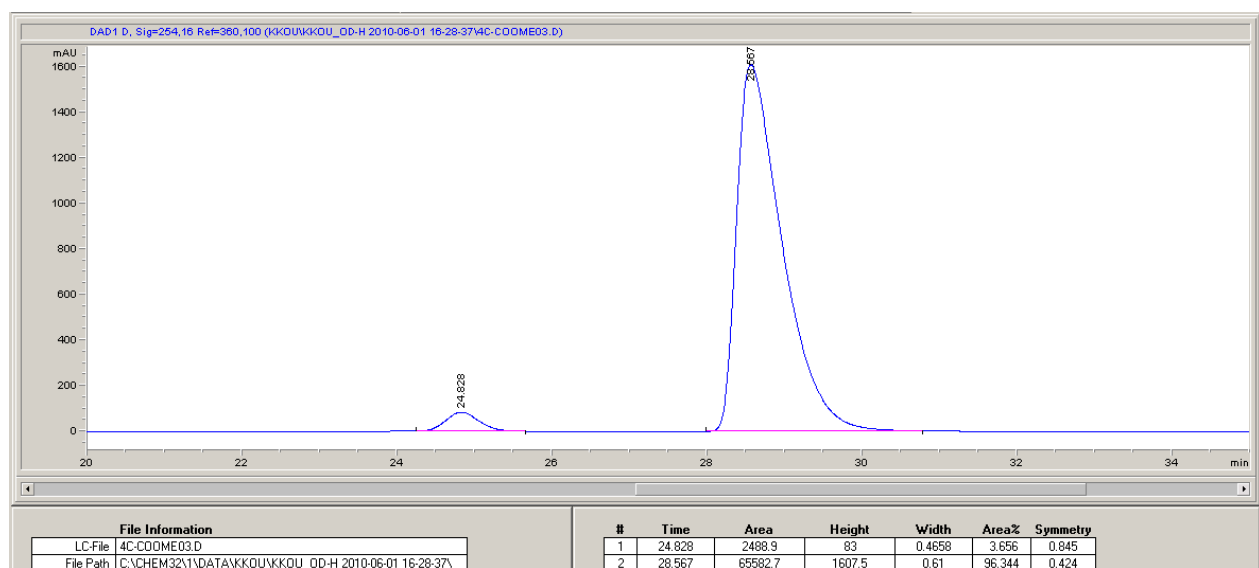

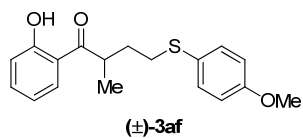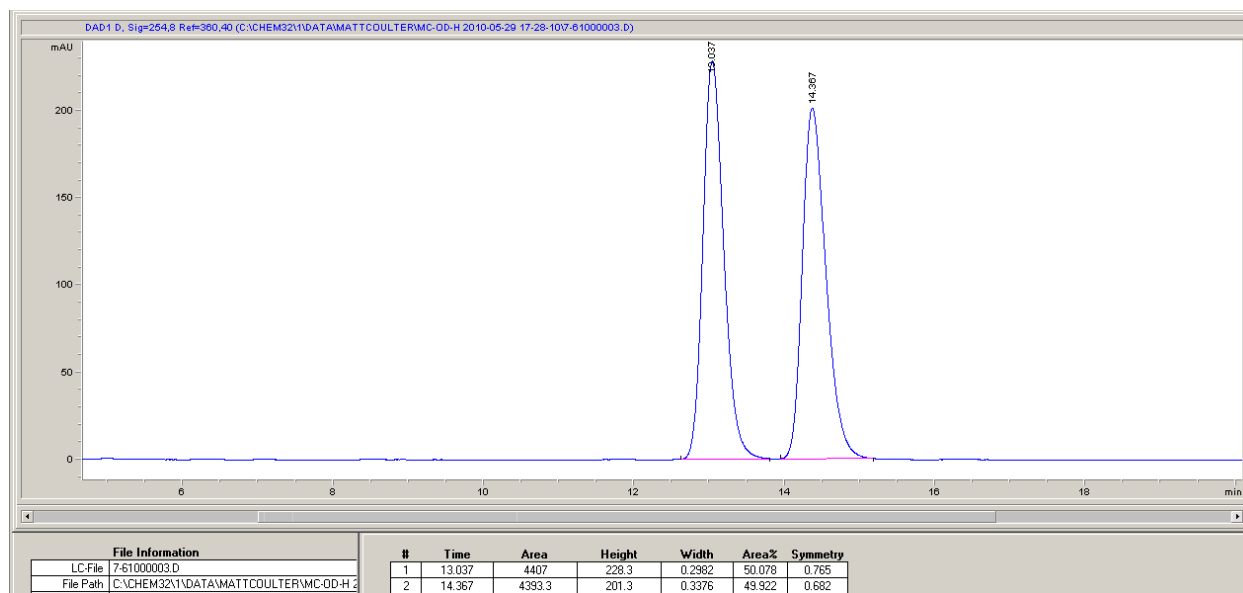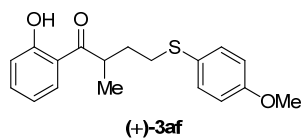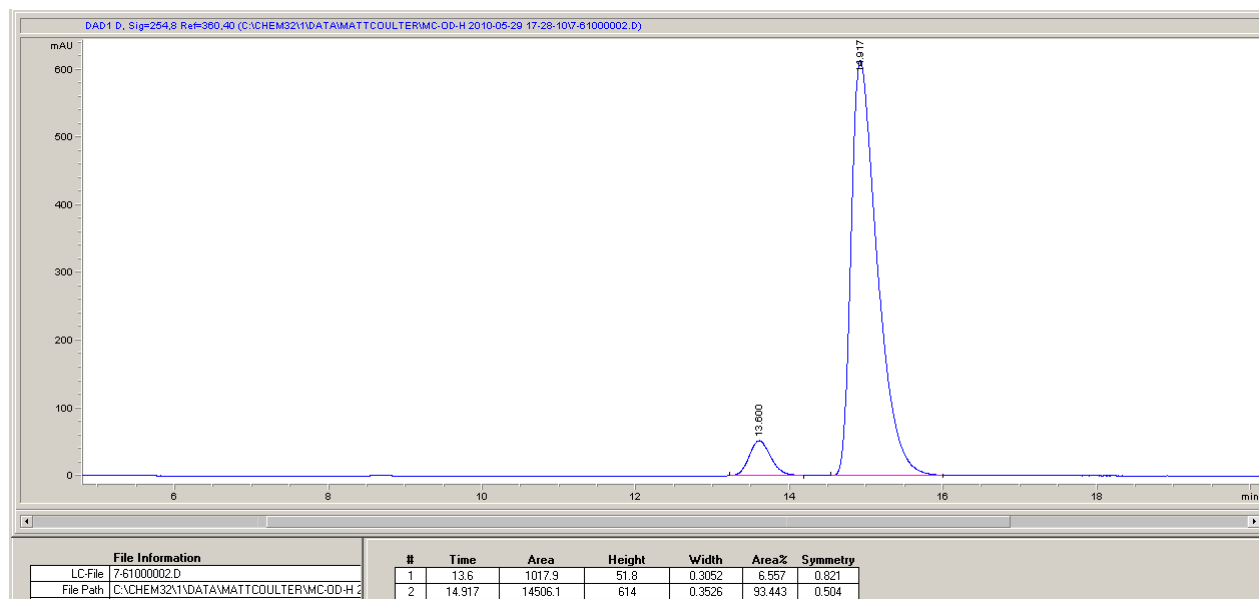

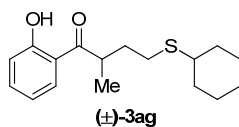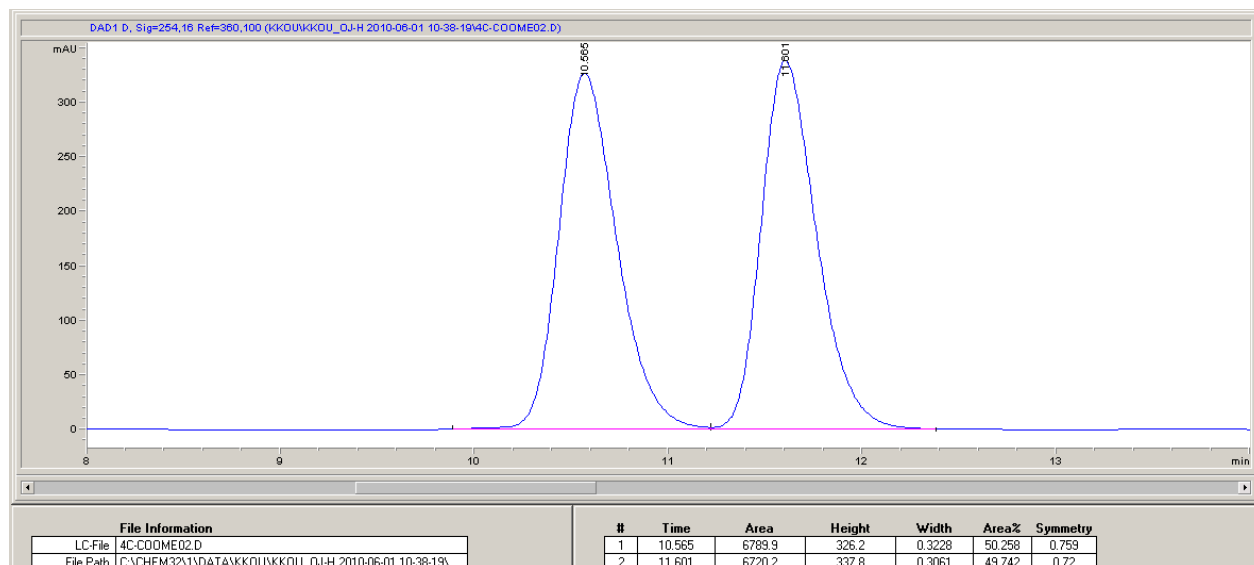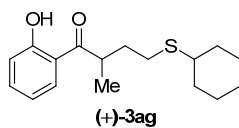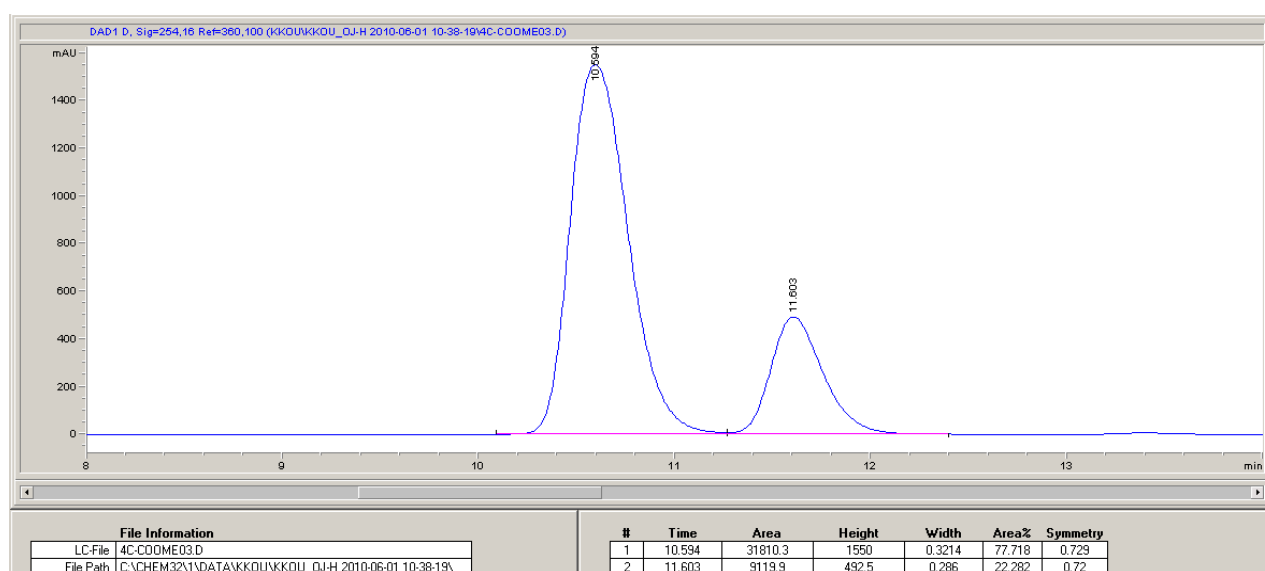

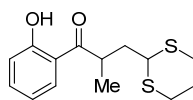

(±)-3ah

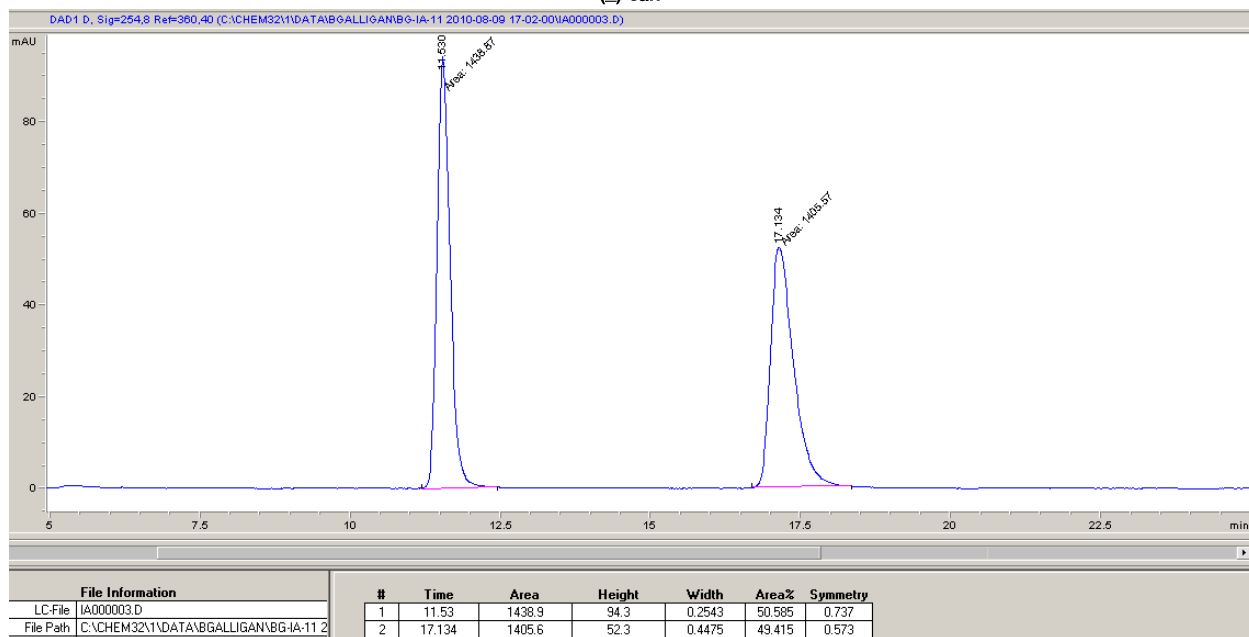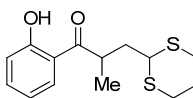

(+) -3ah

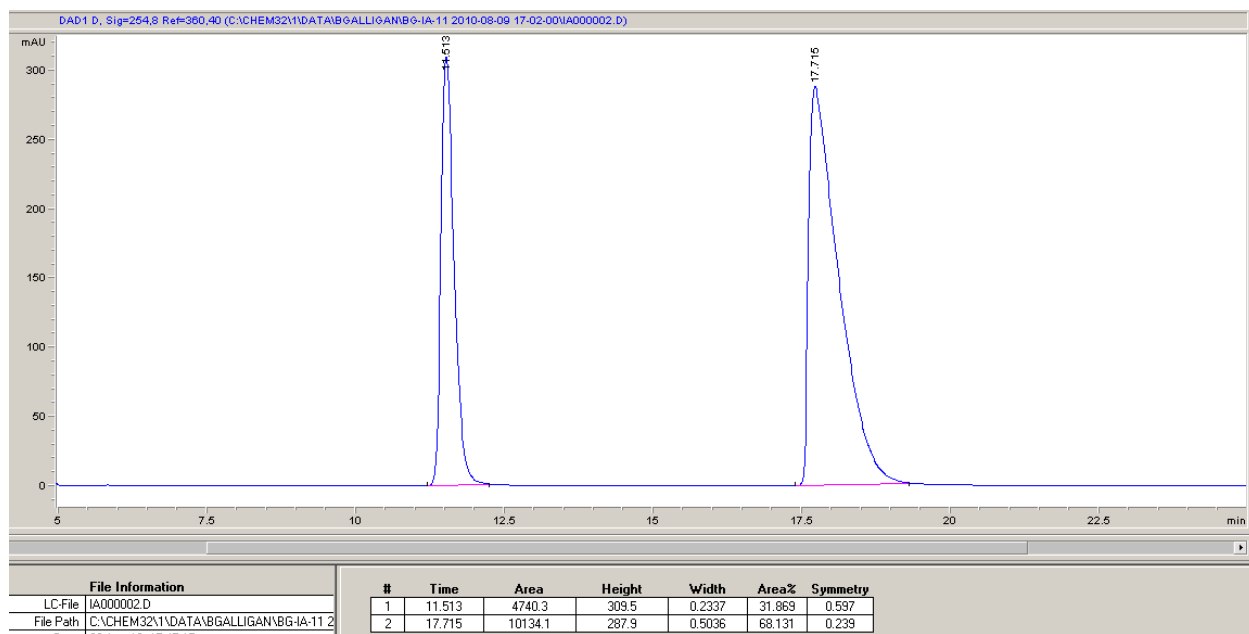

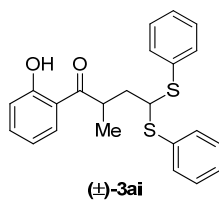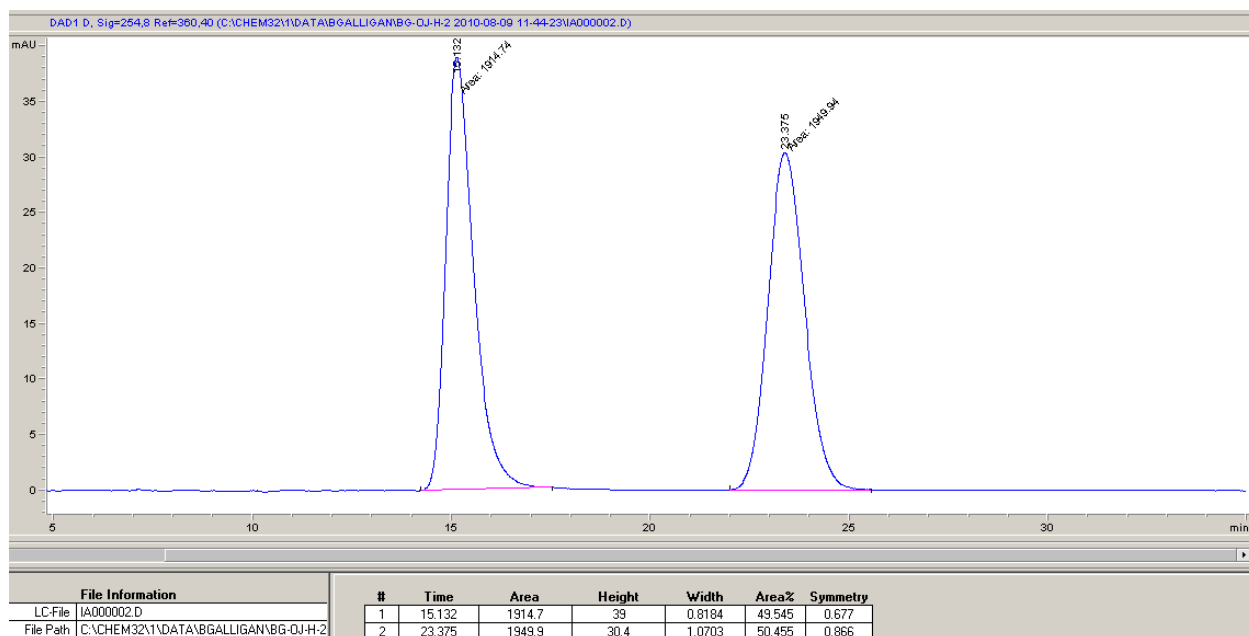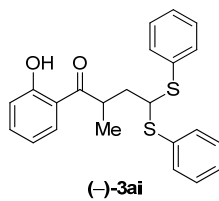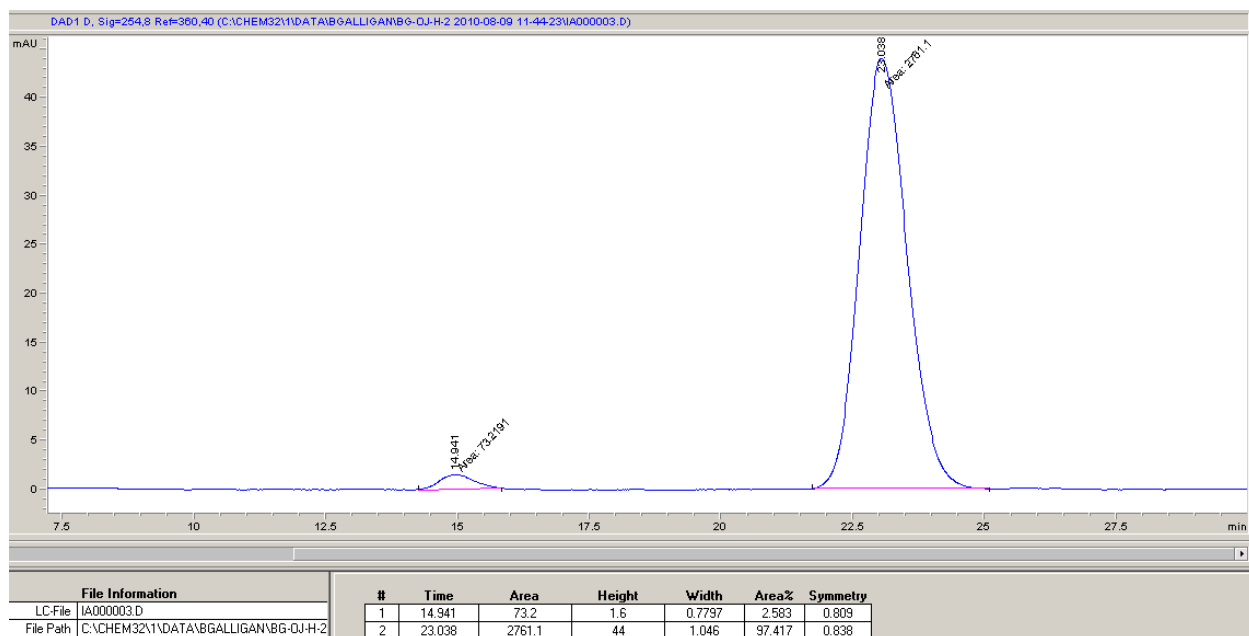

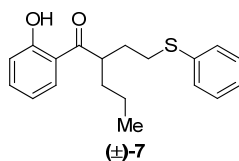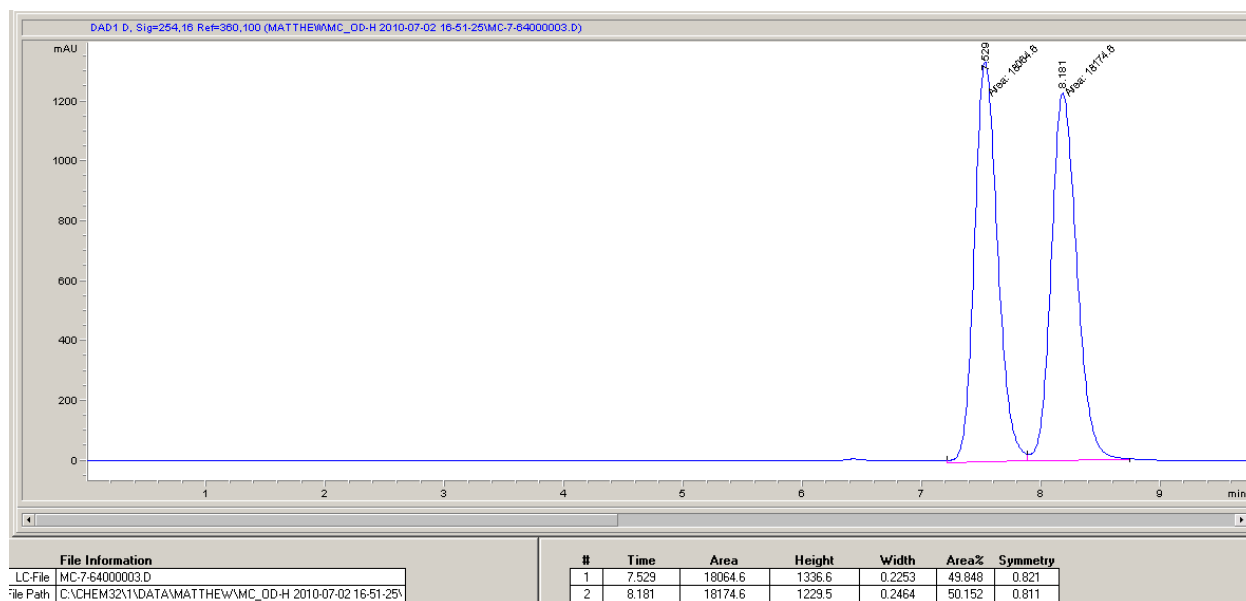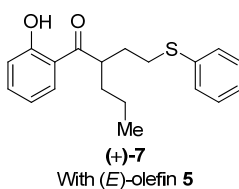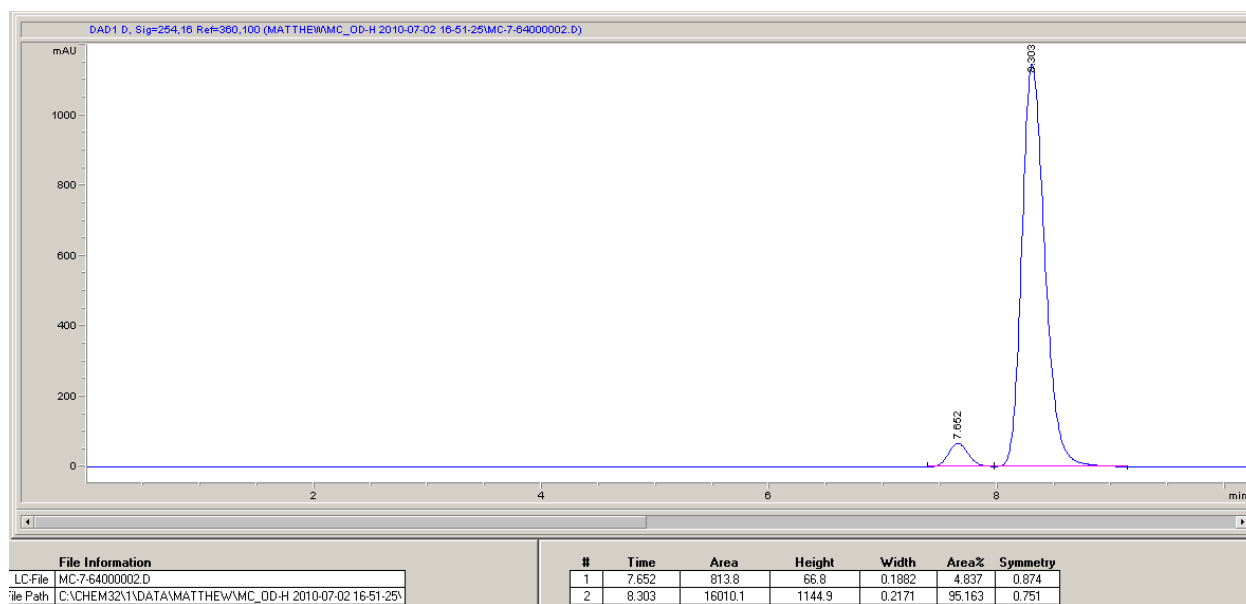

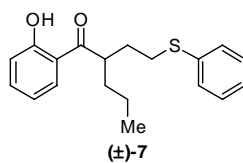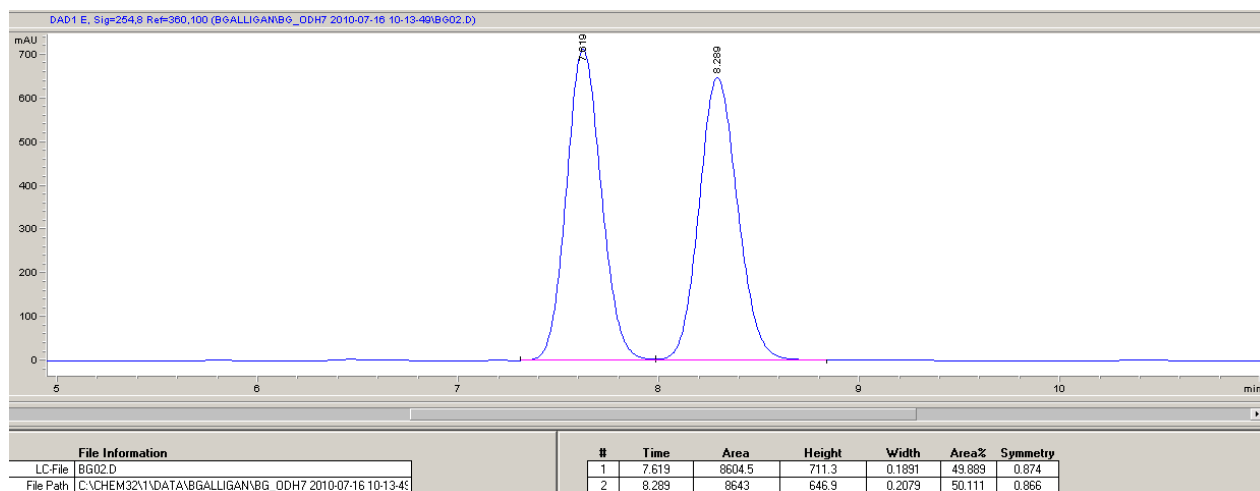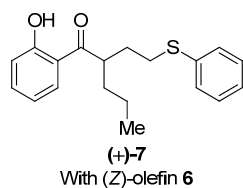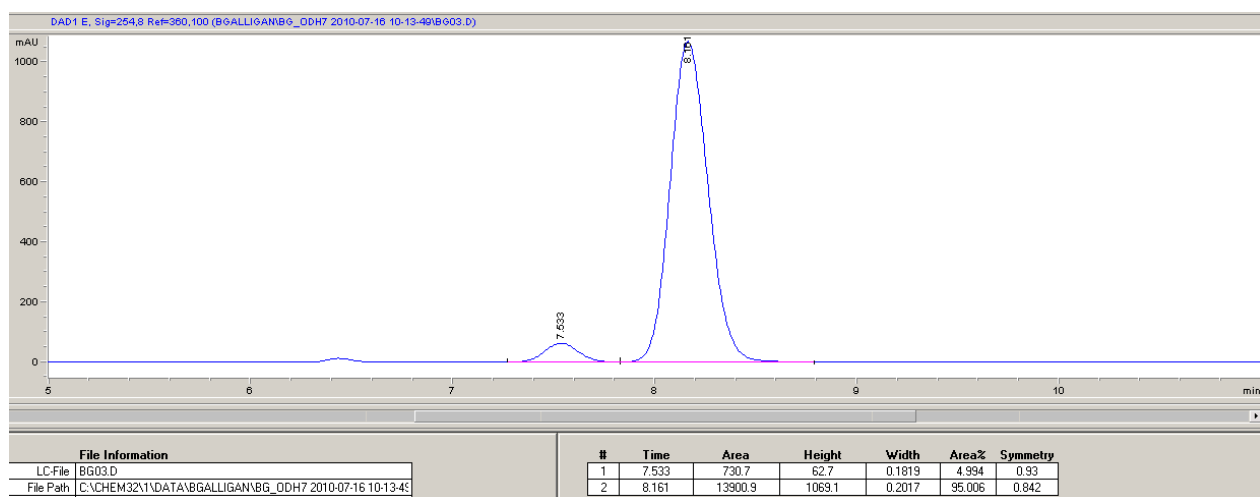

## 5. NMR Spectra

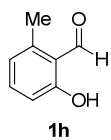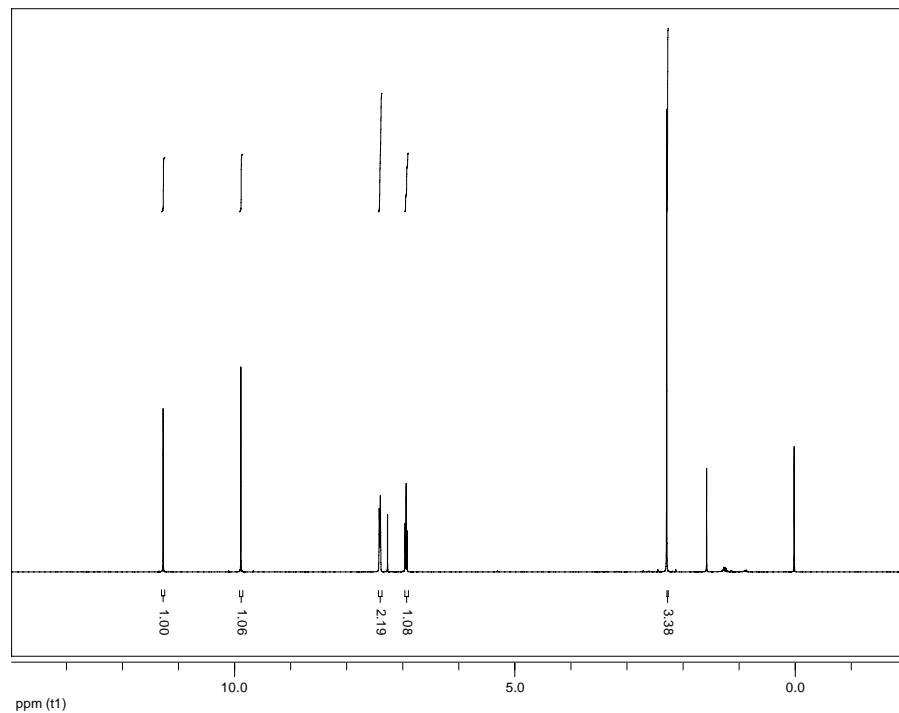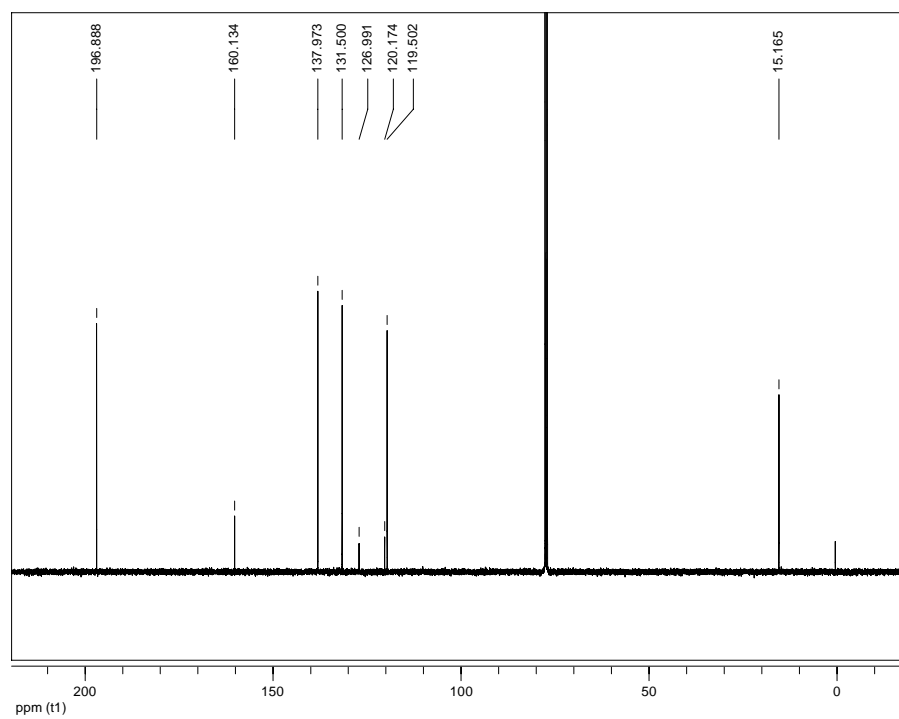



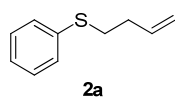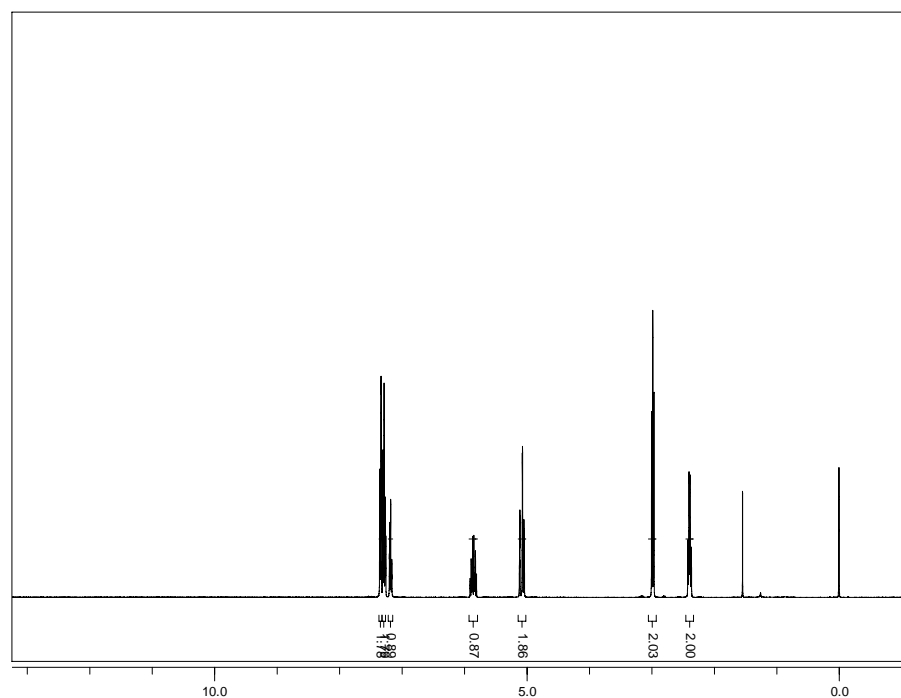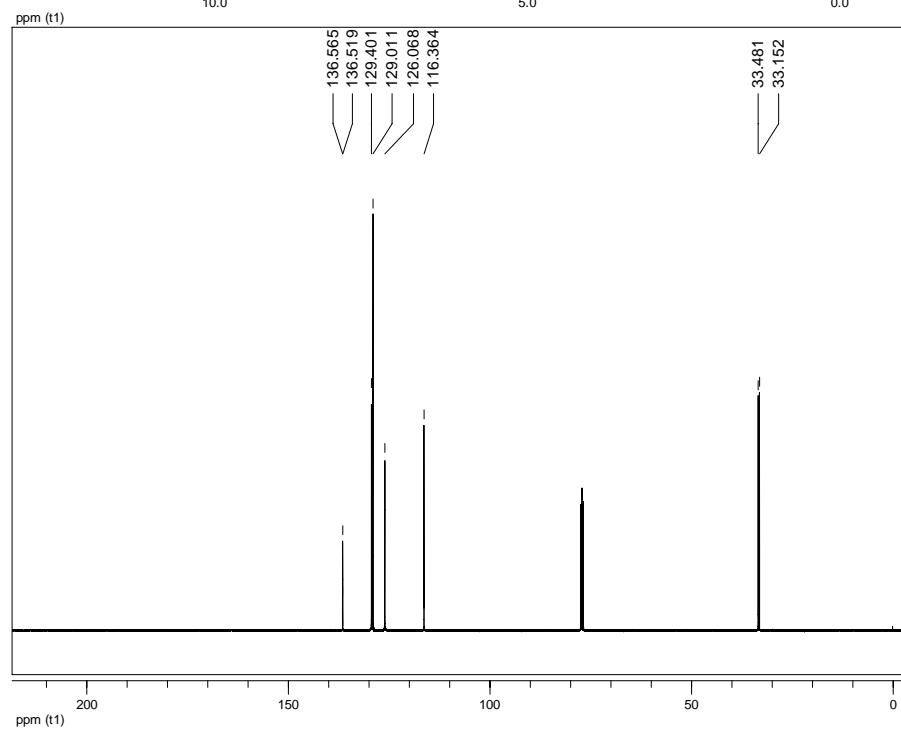

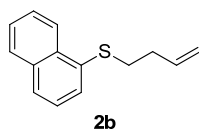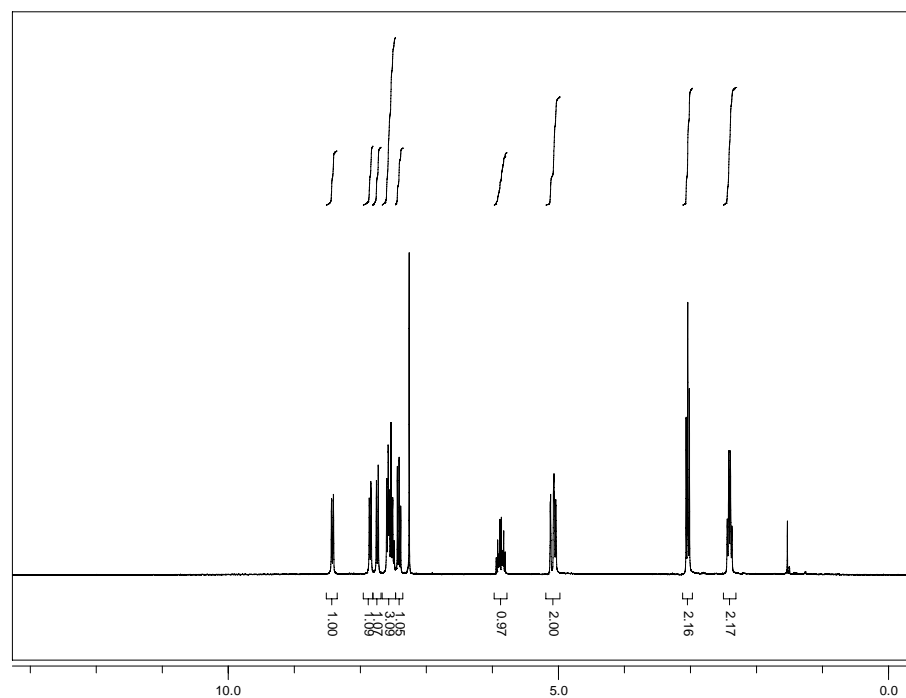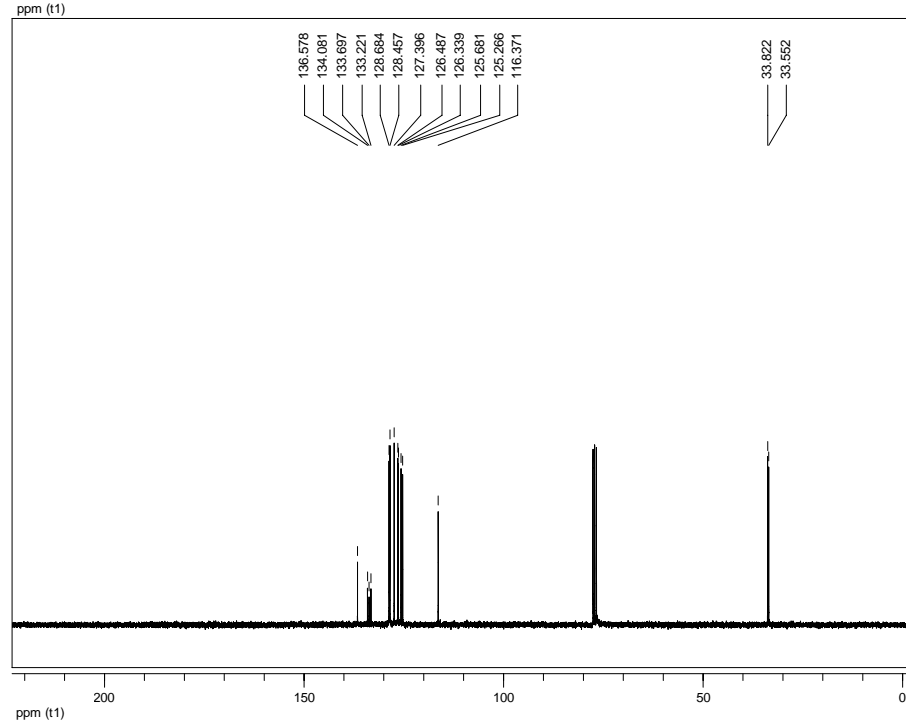

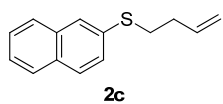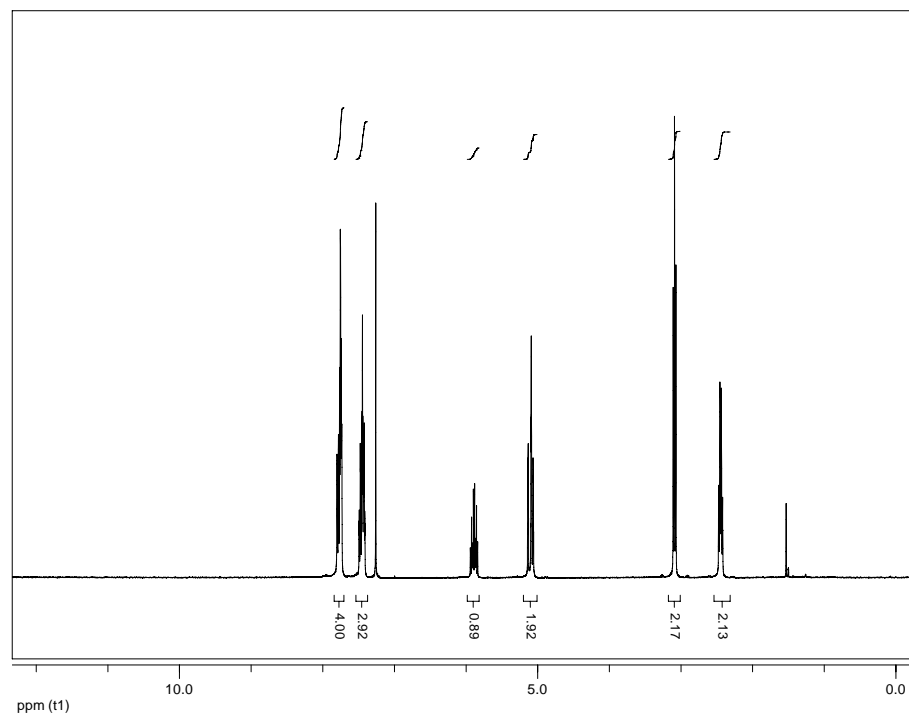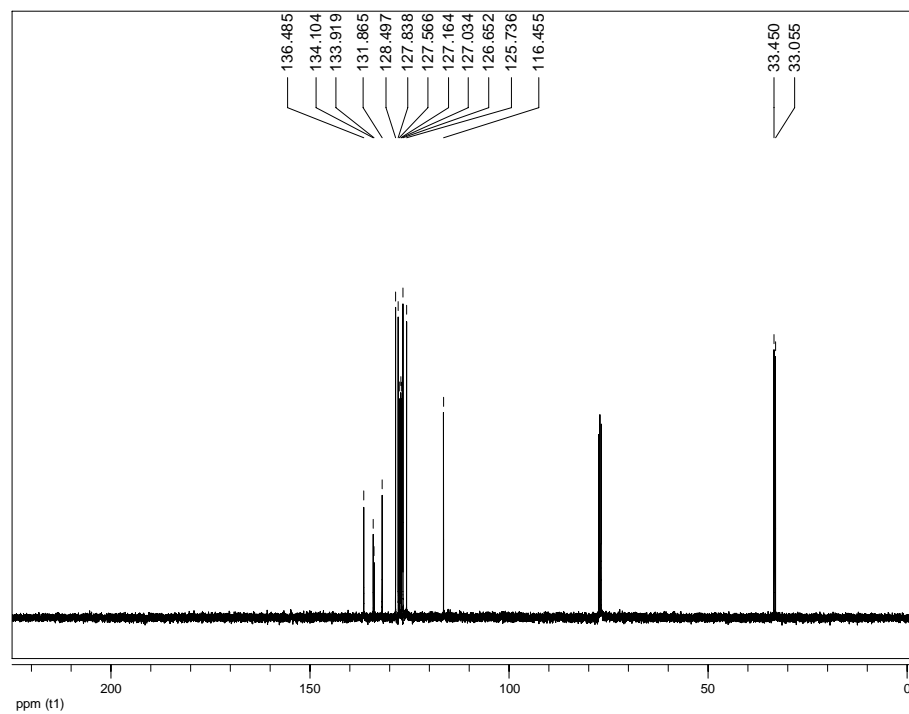

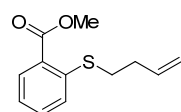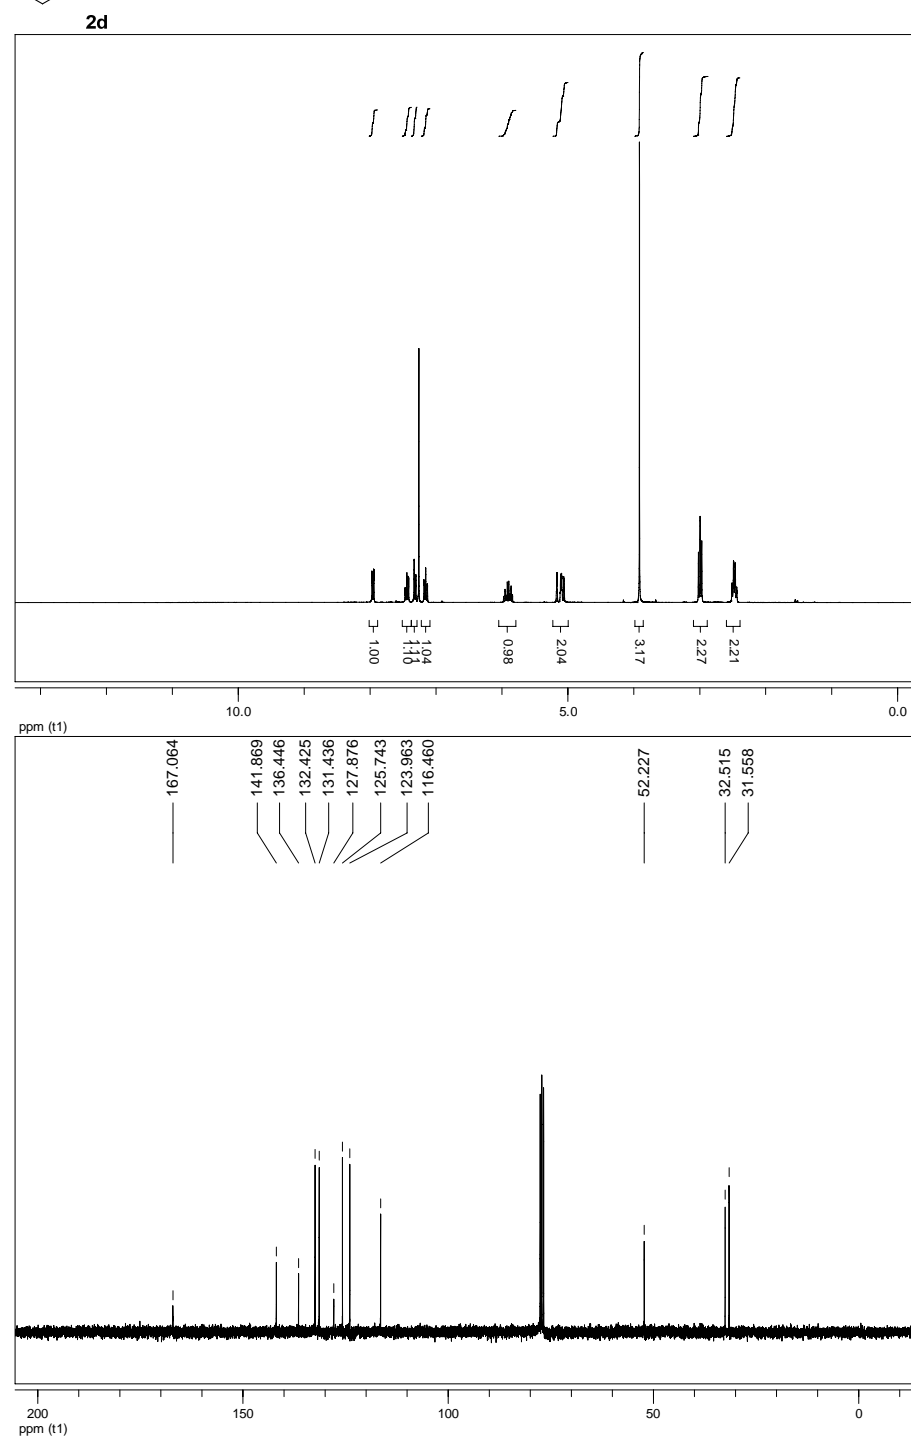

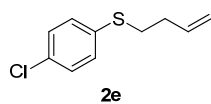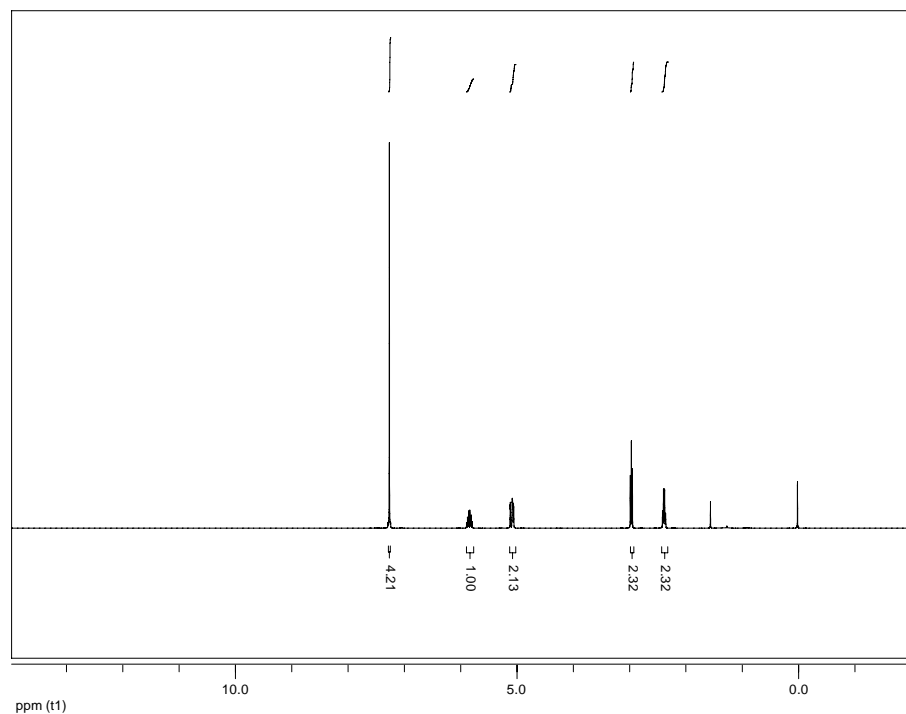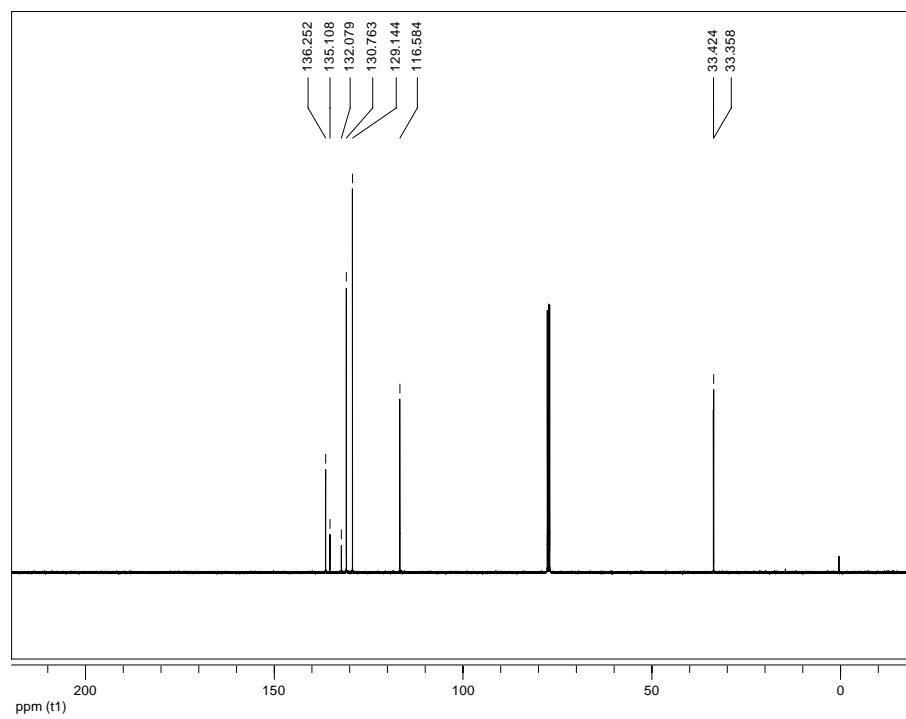

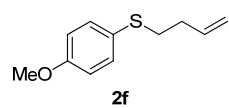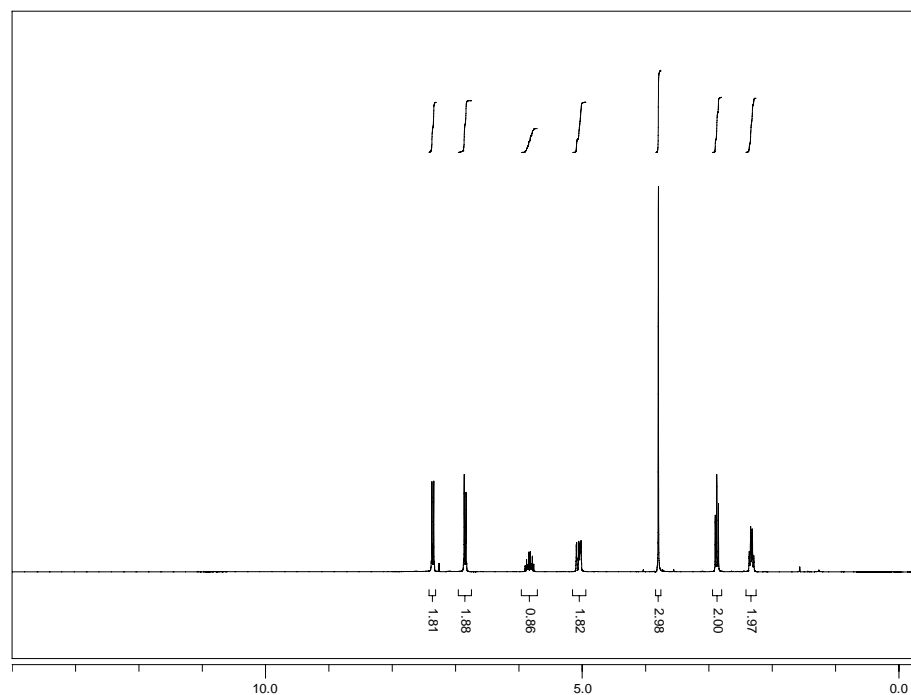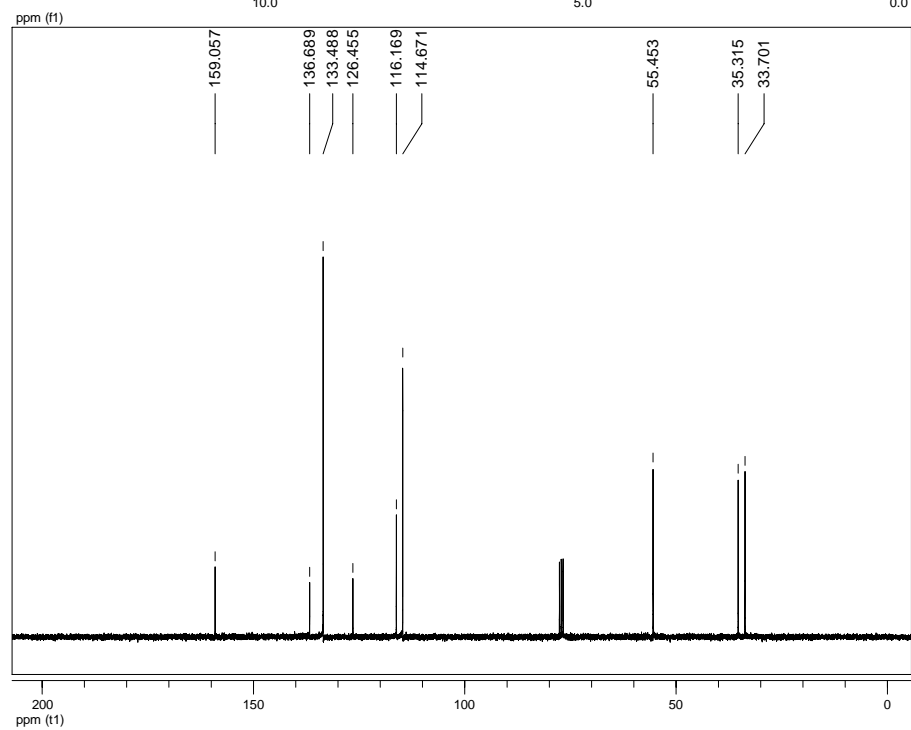

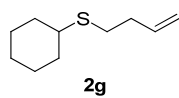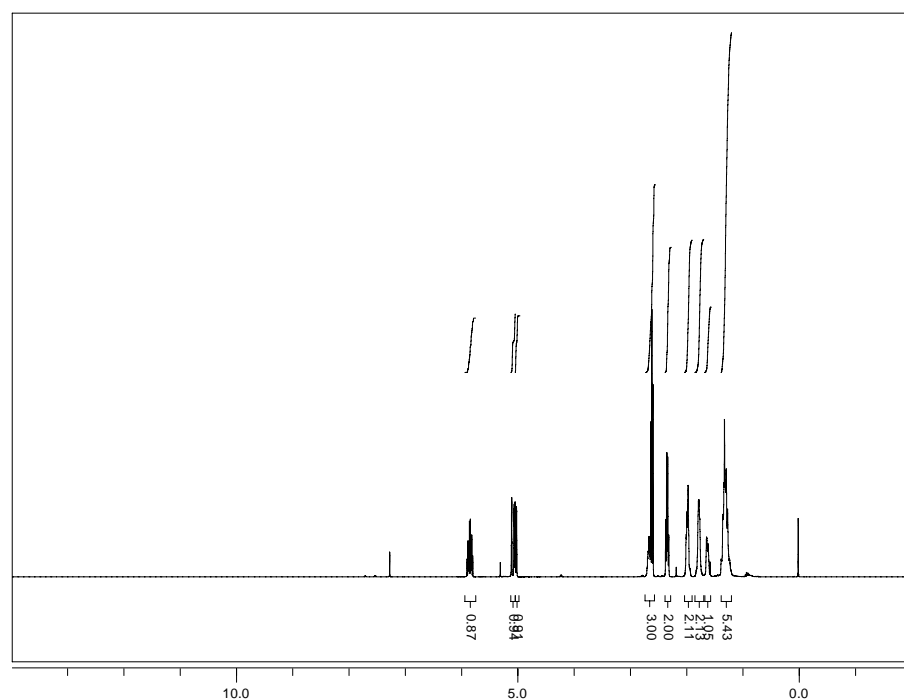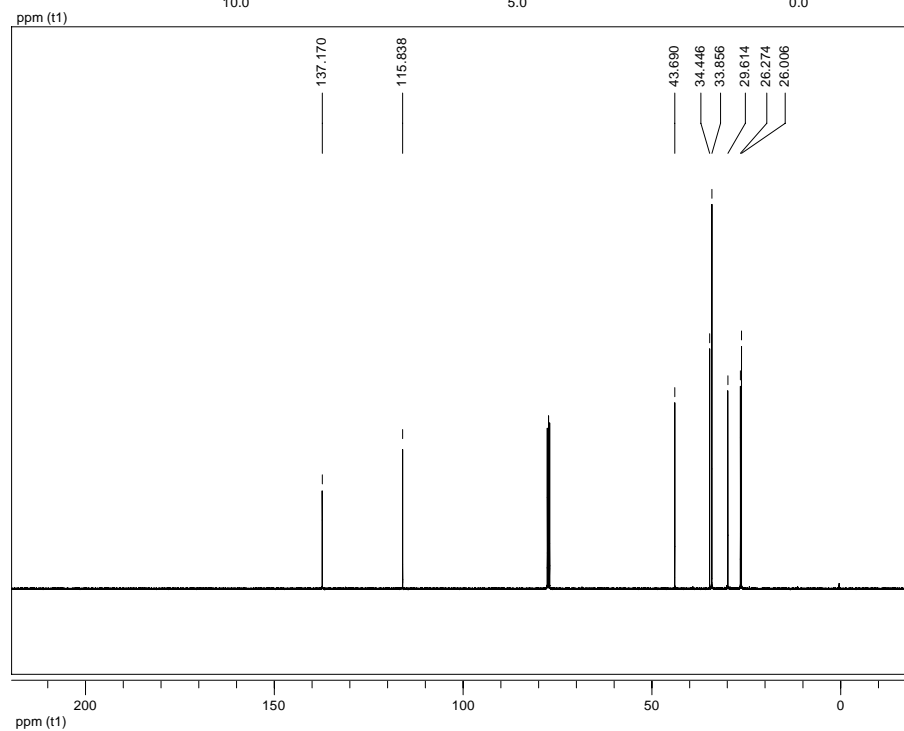

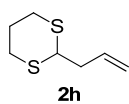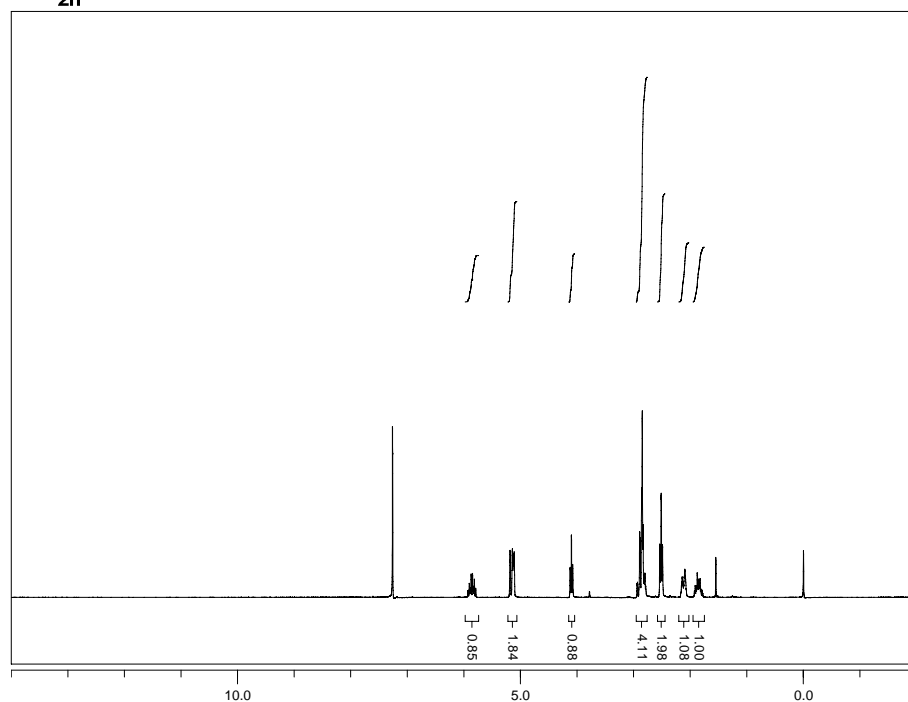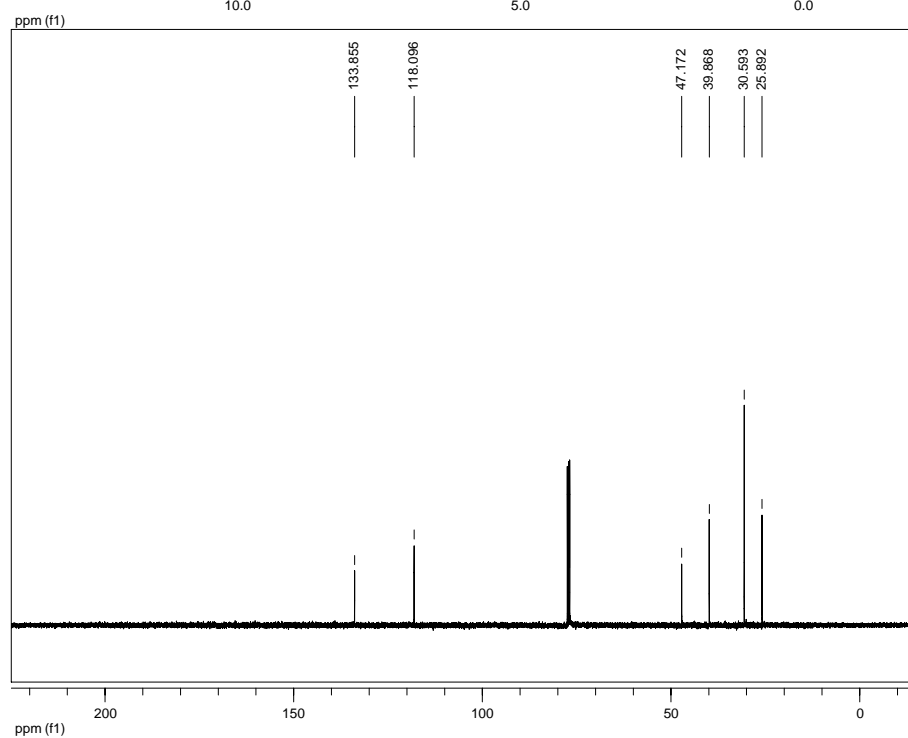



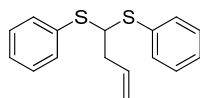**2i**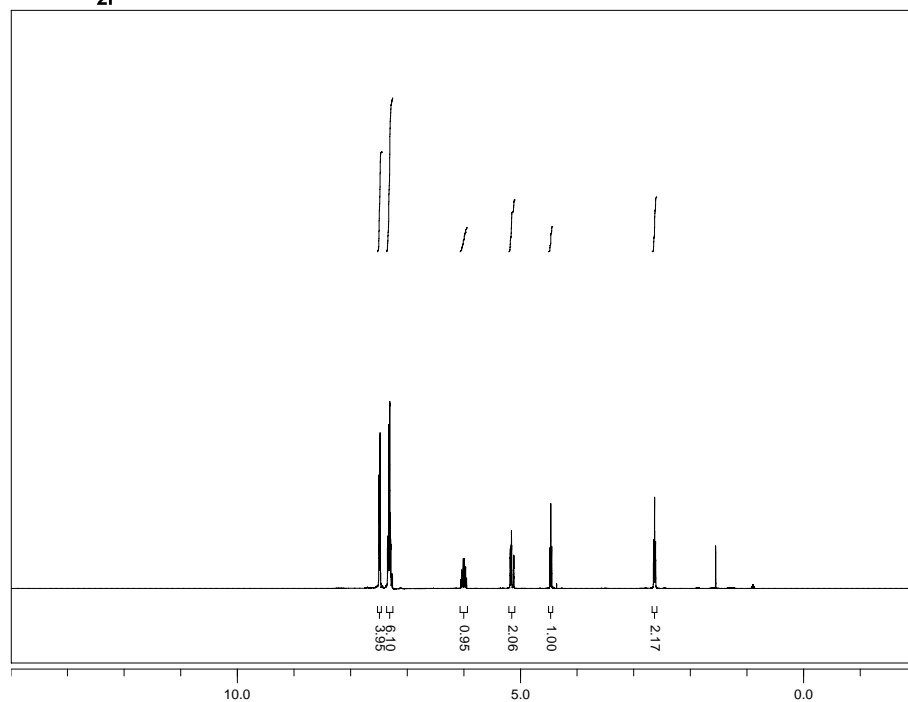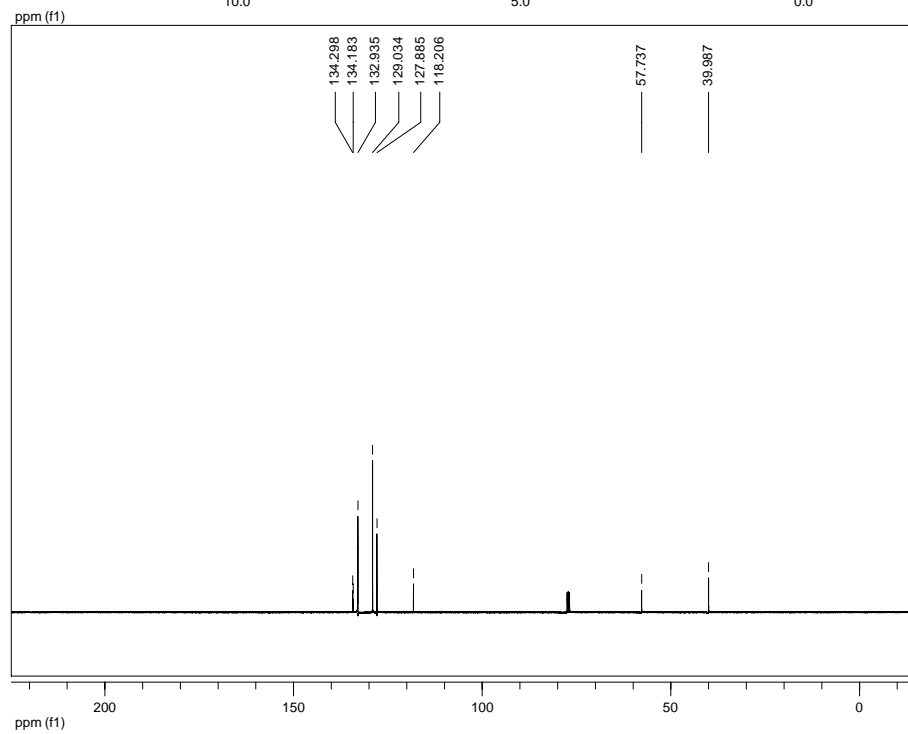

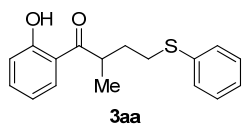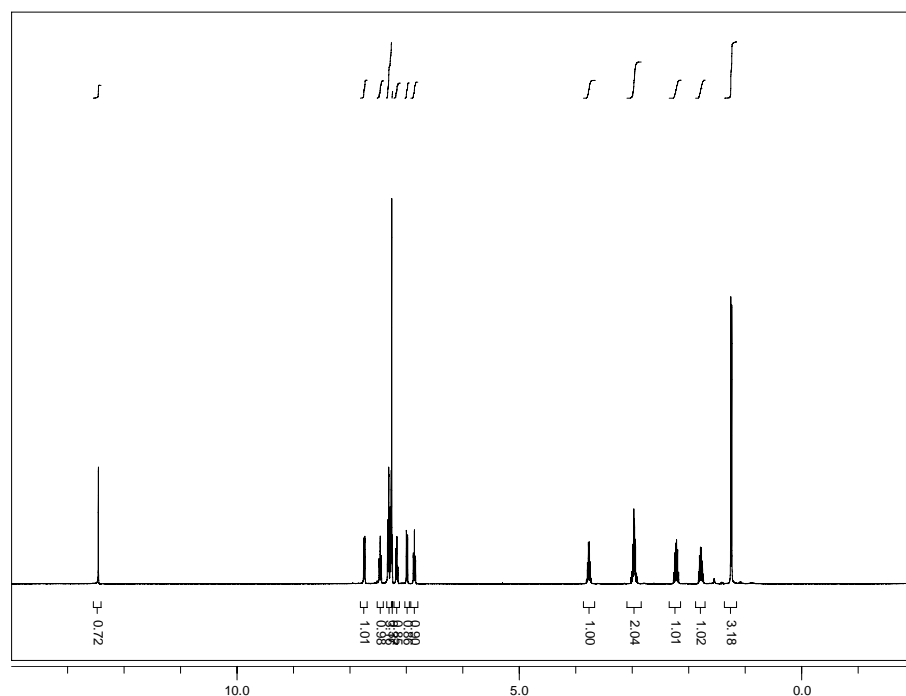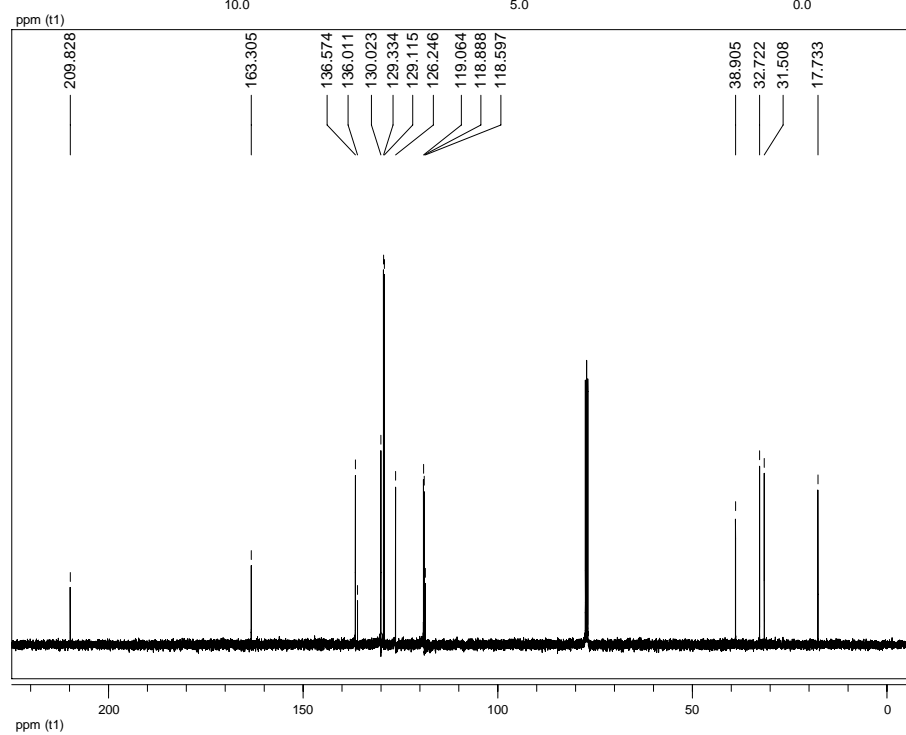

**3aa COSY**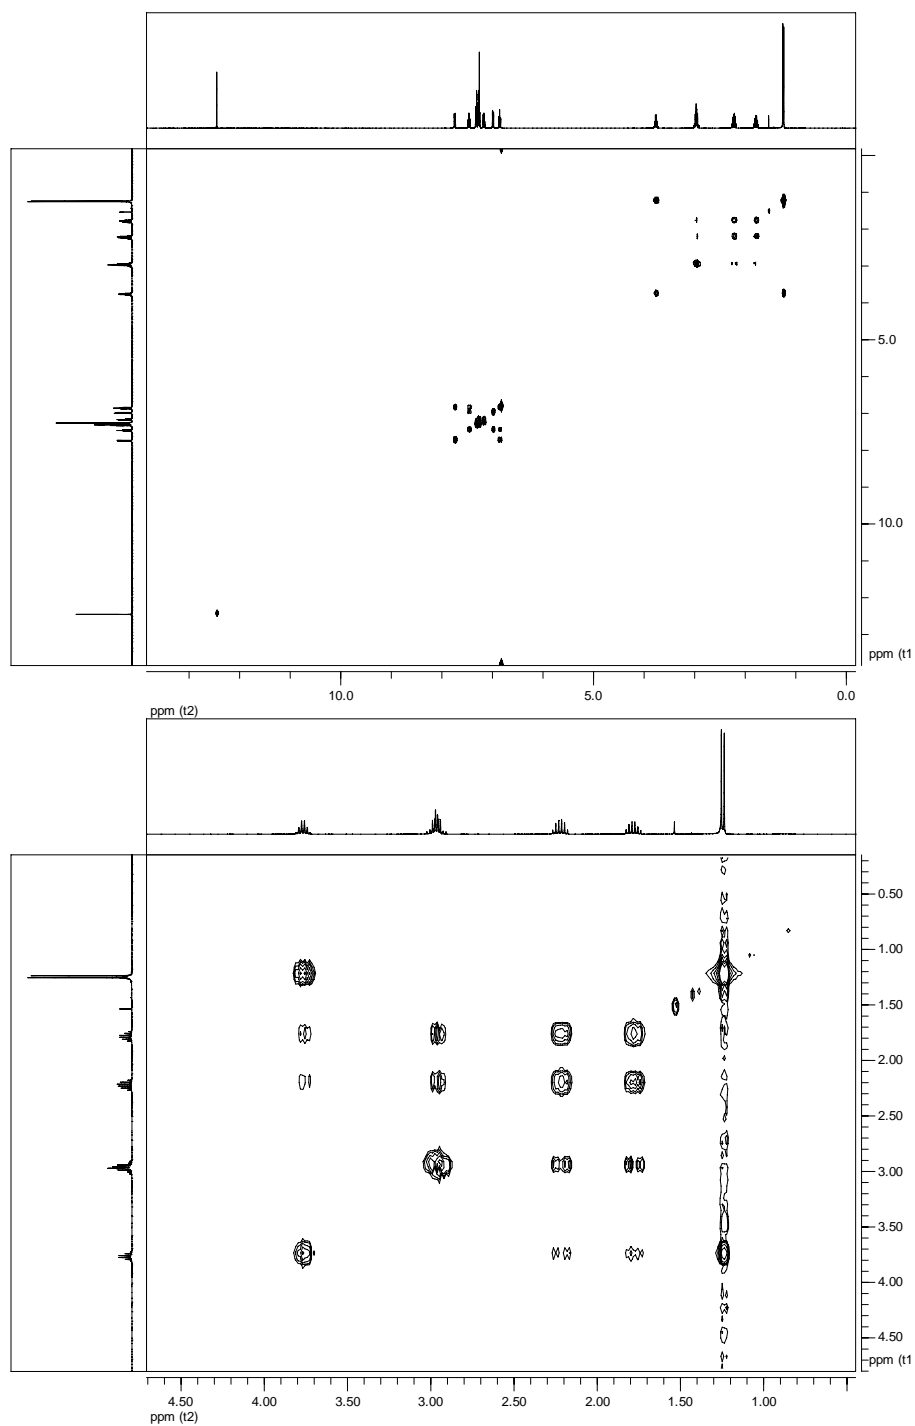

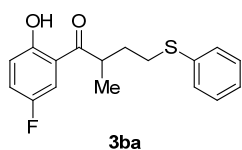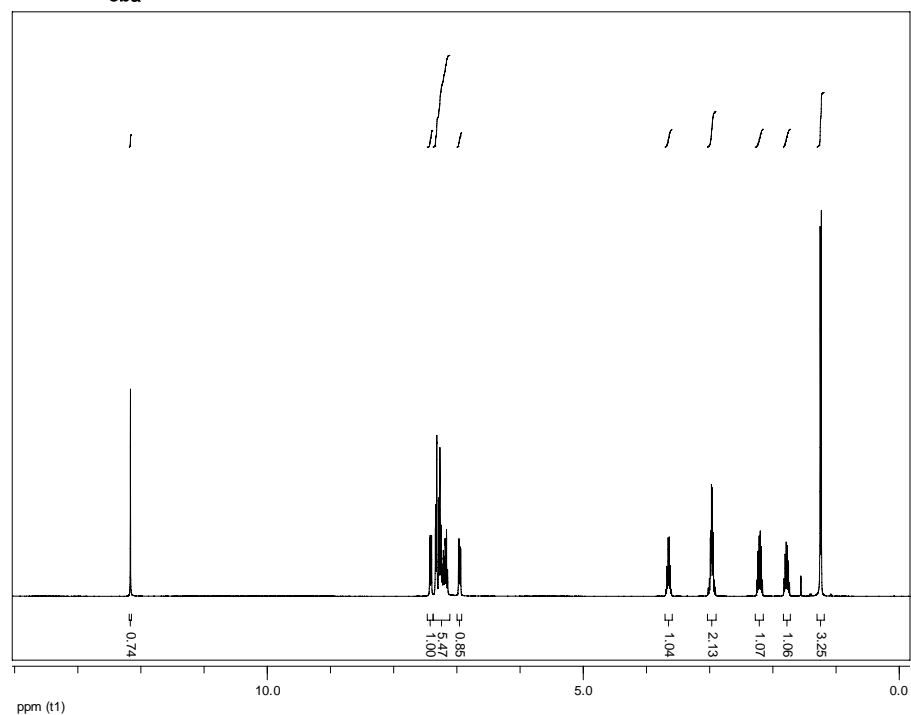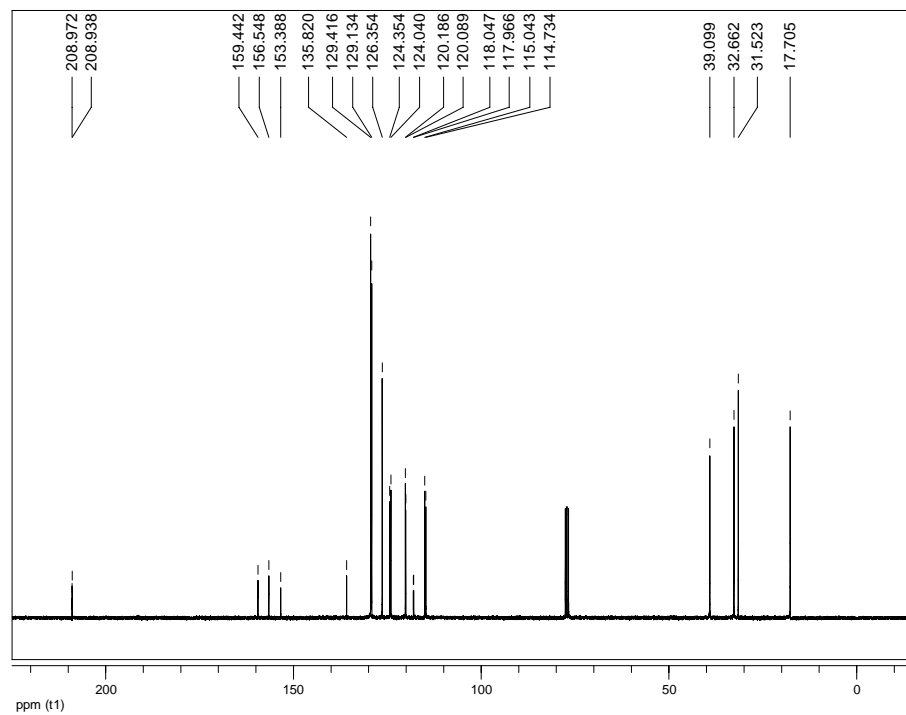

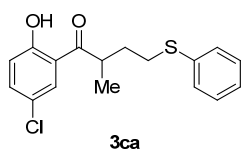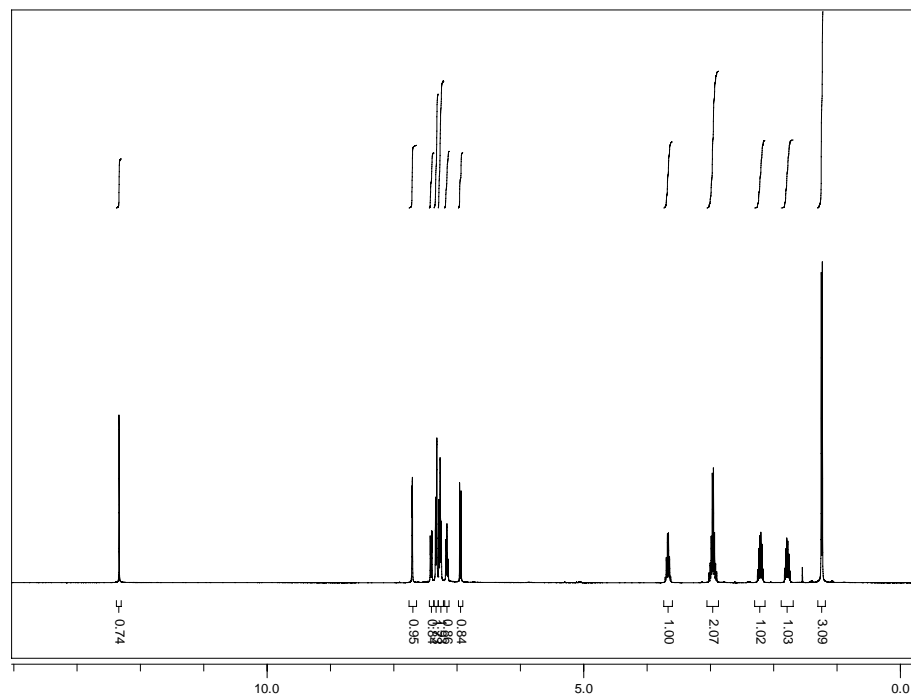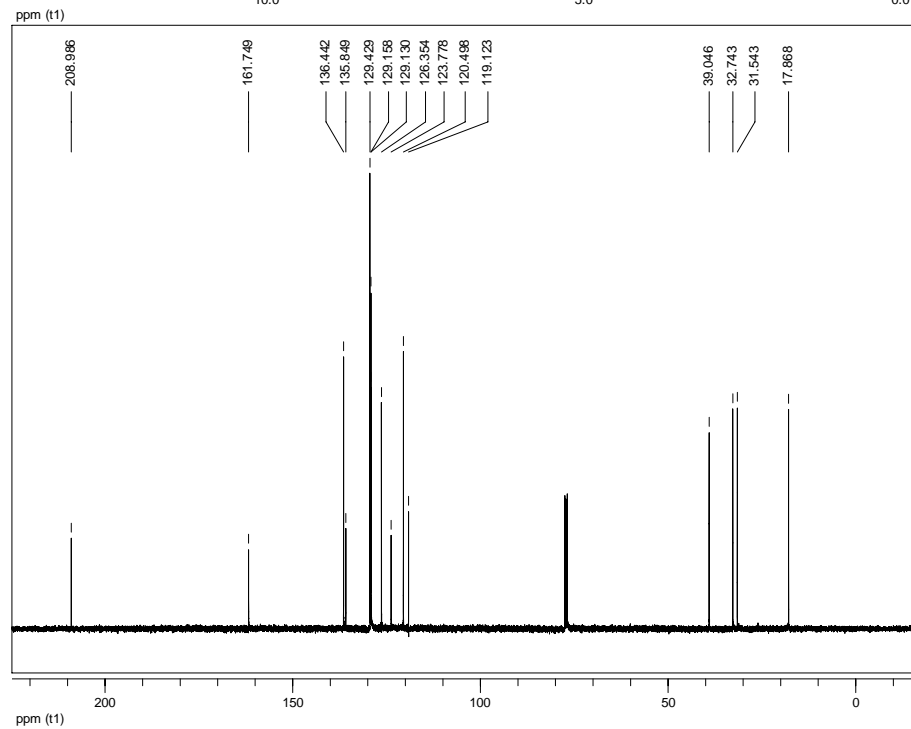

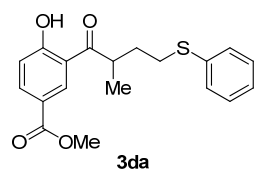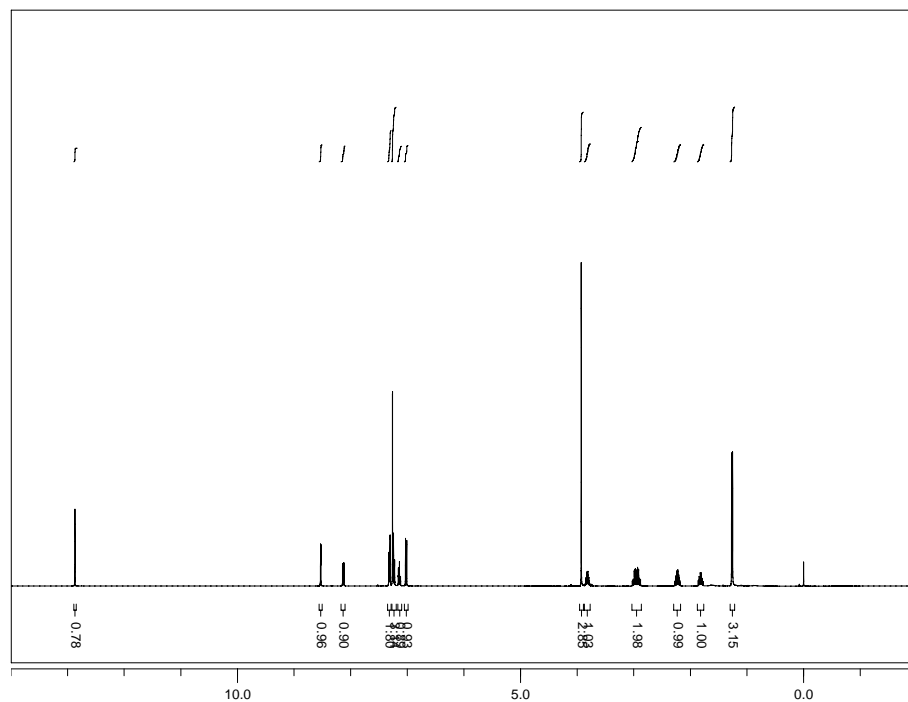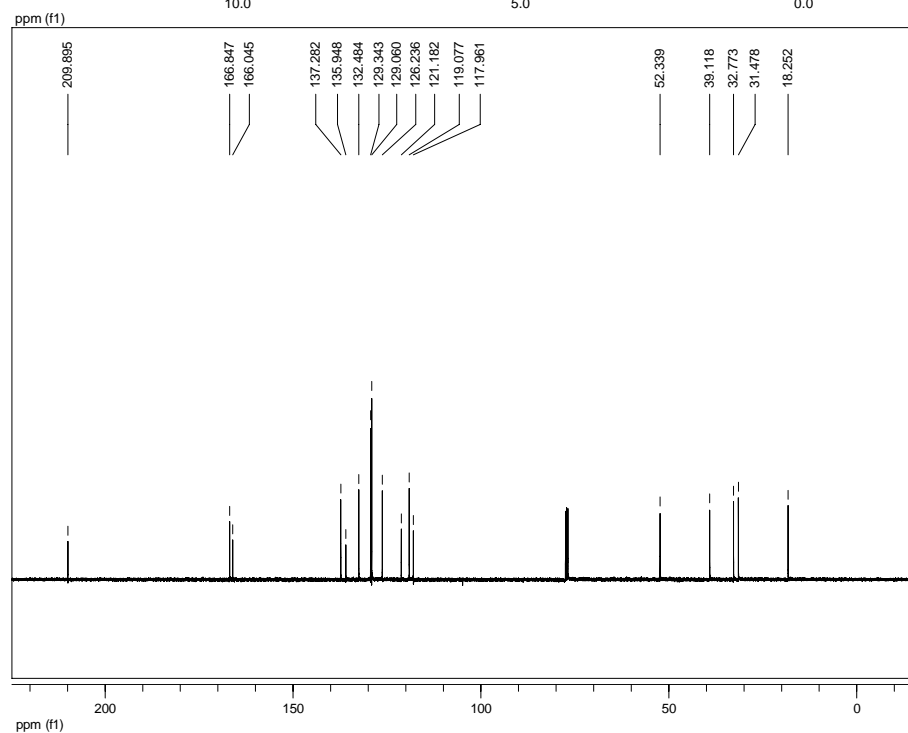

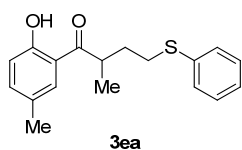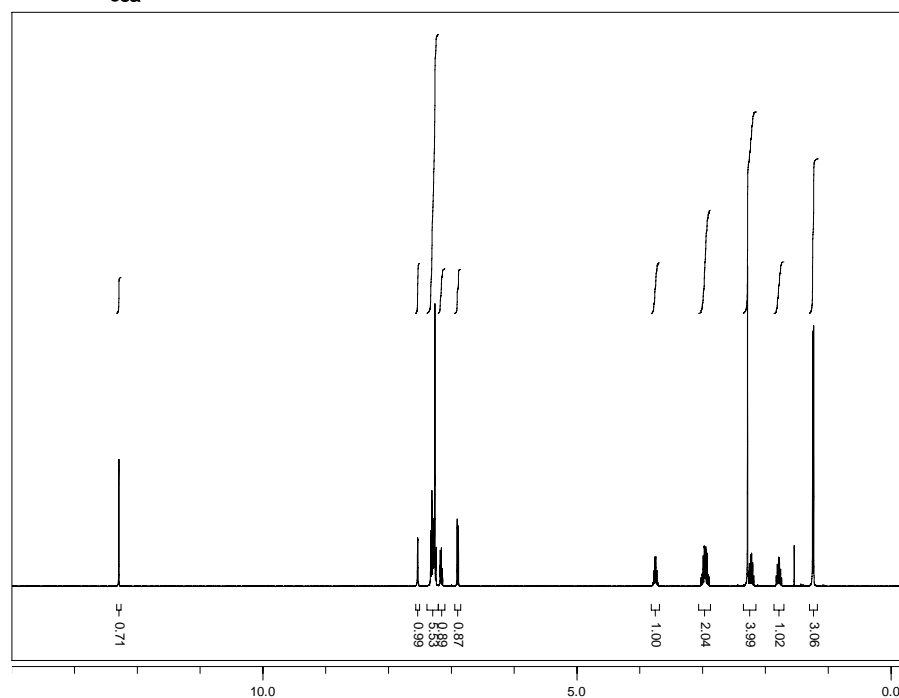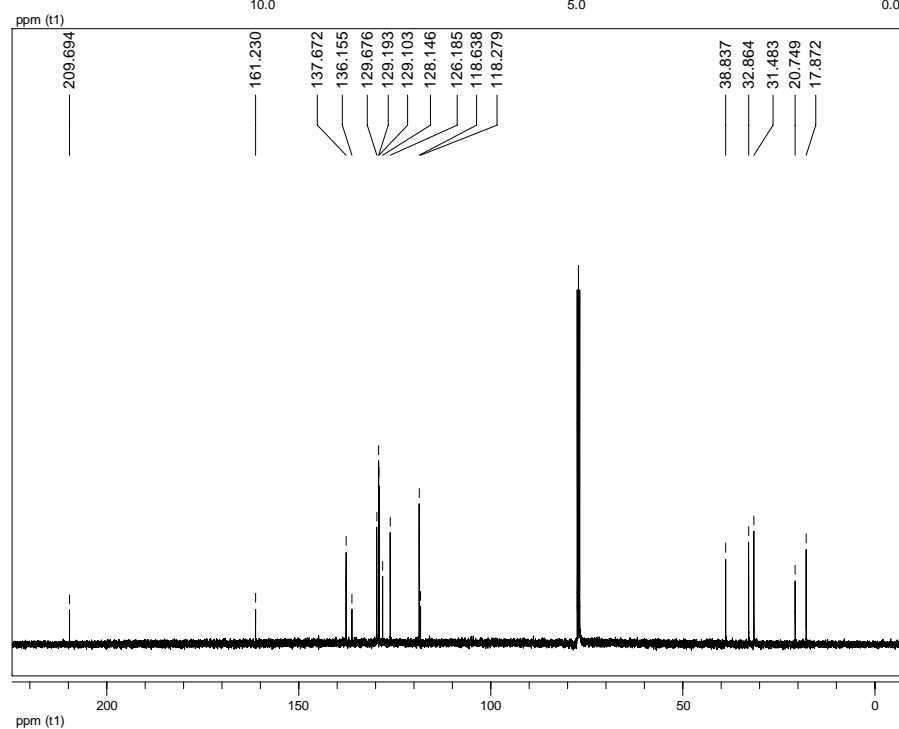

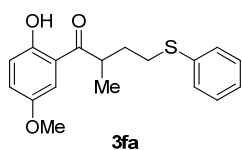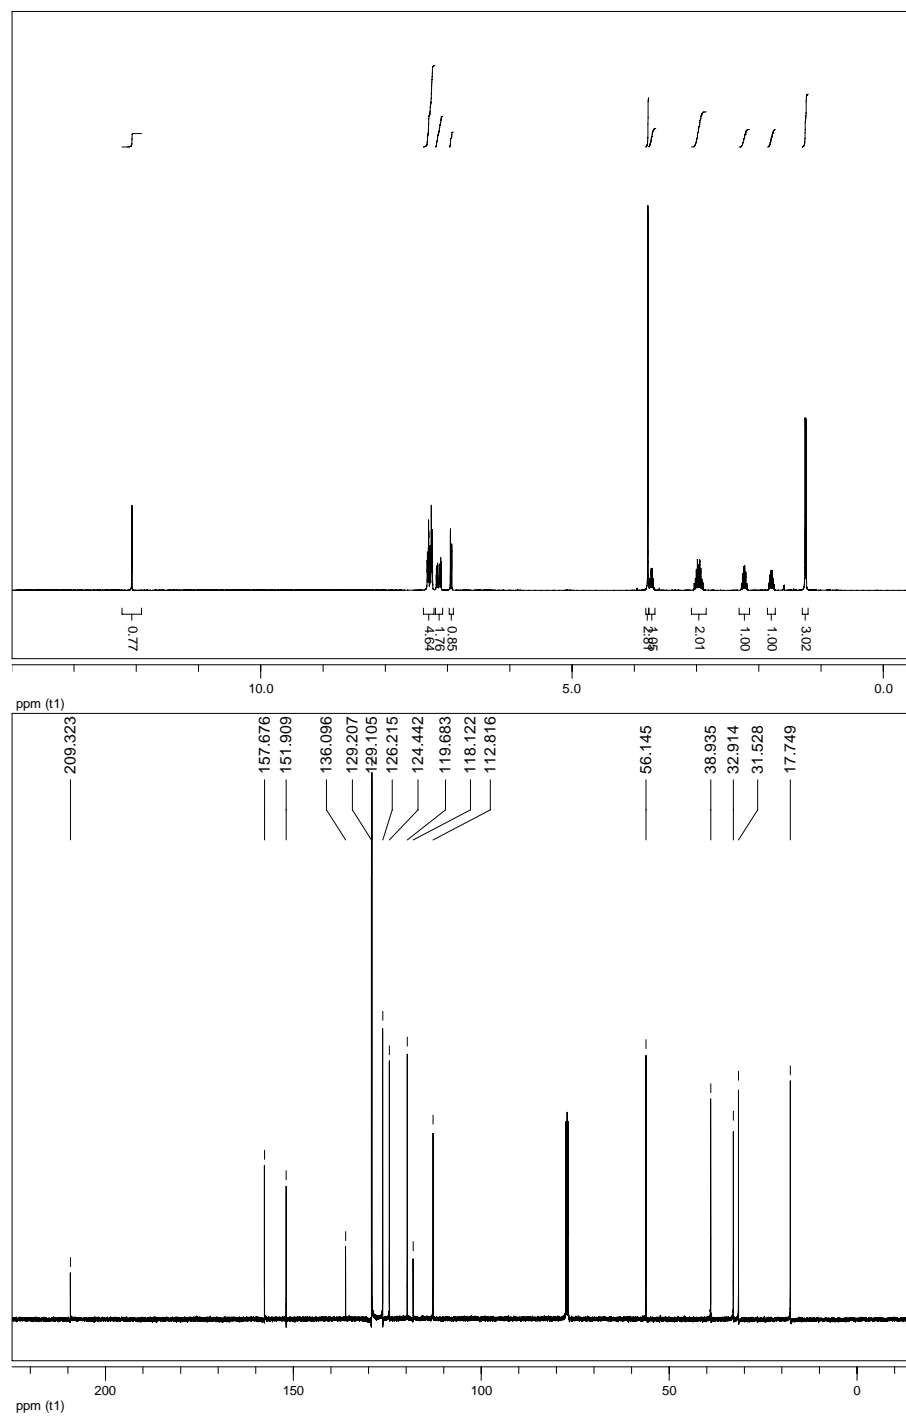



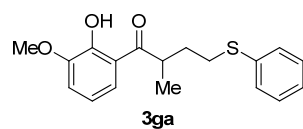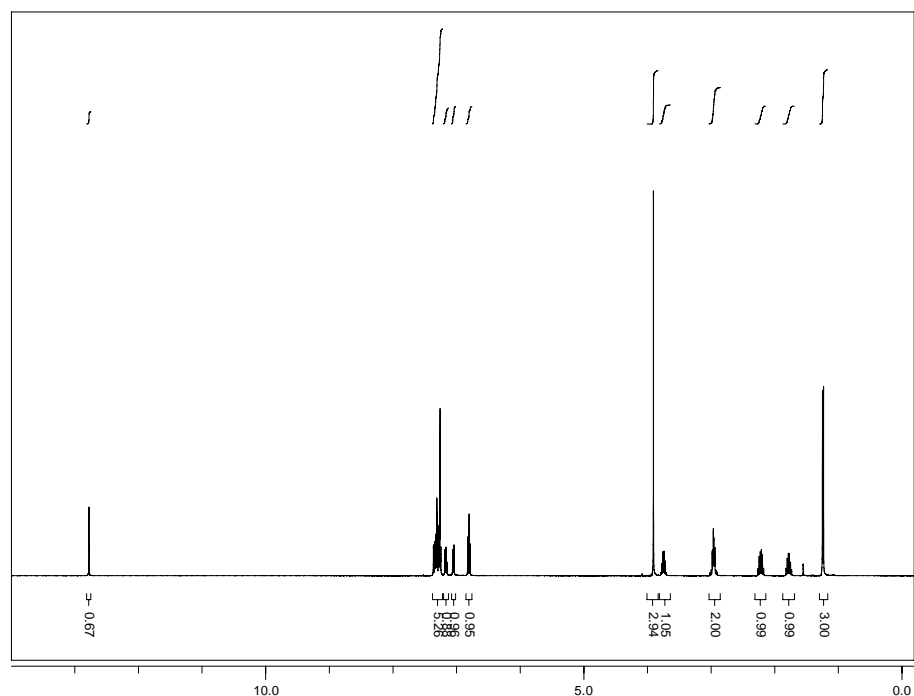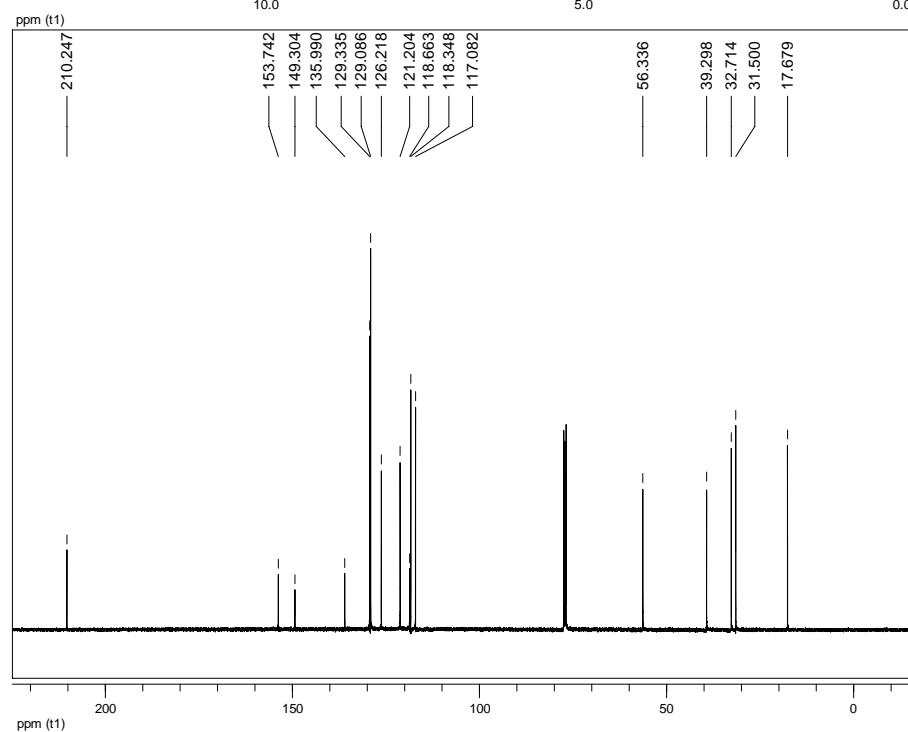

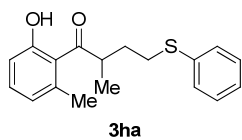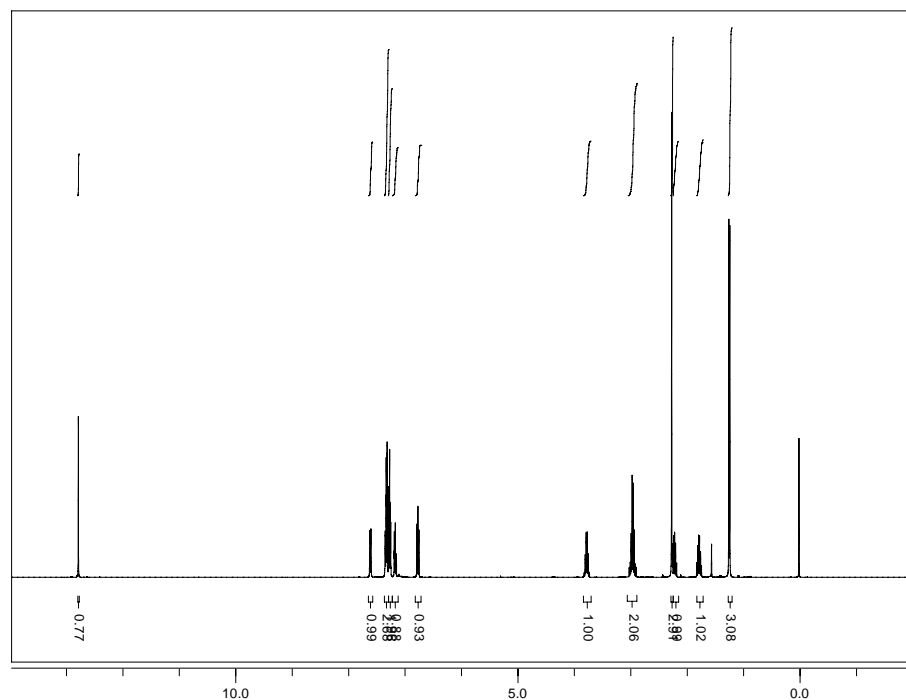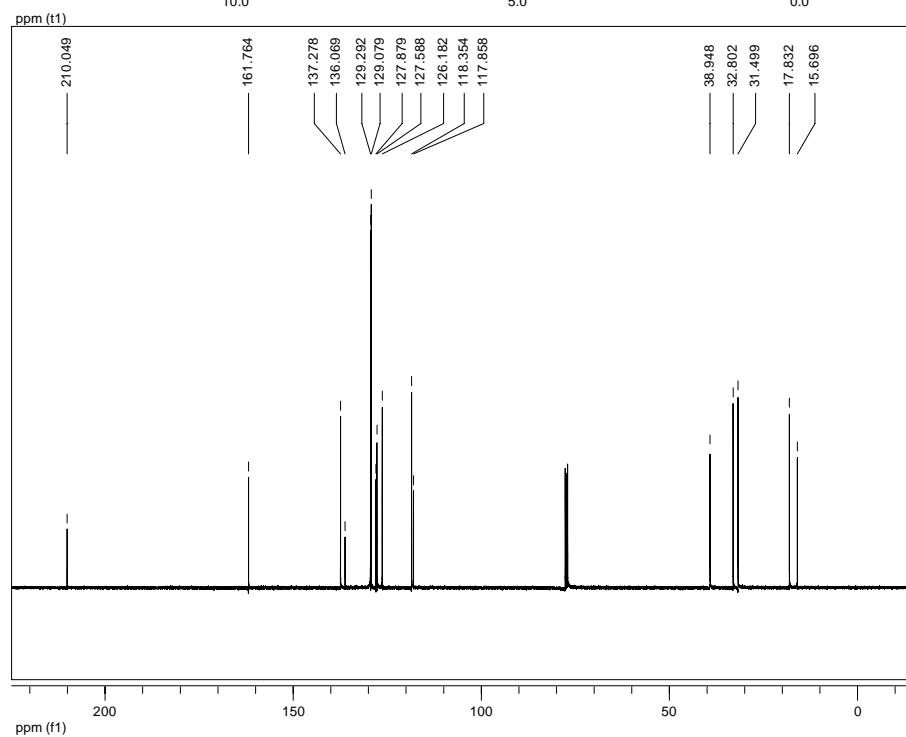

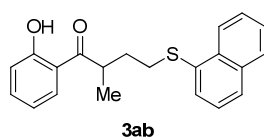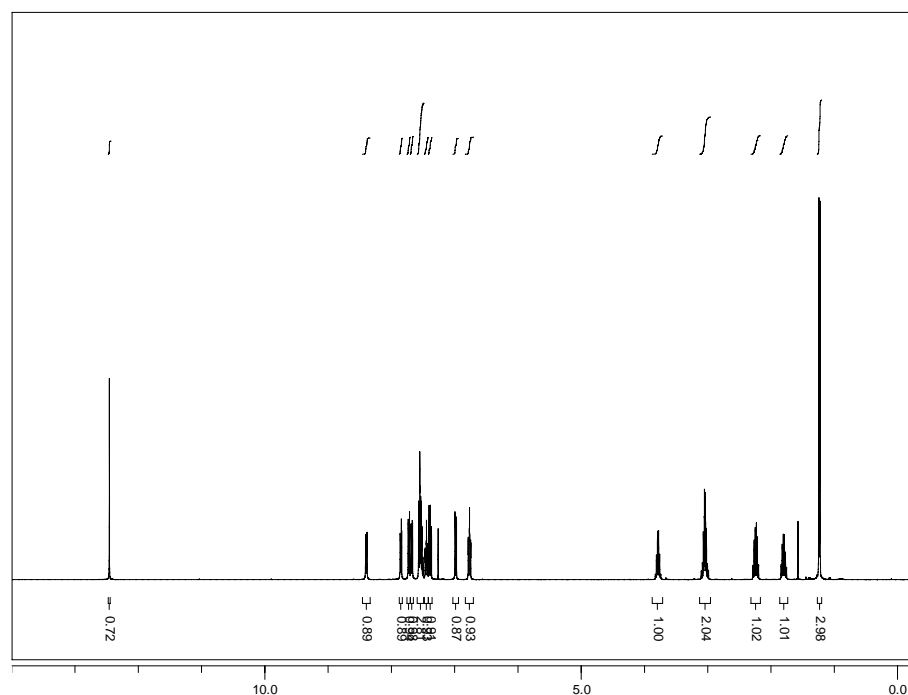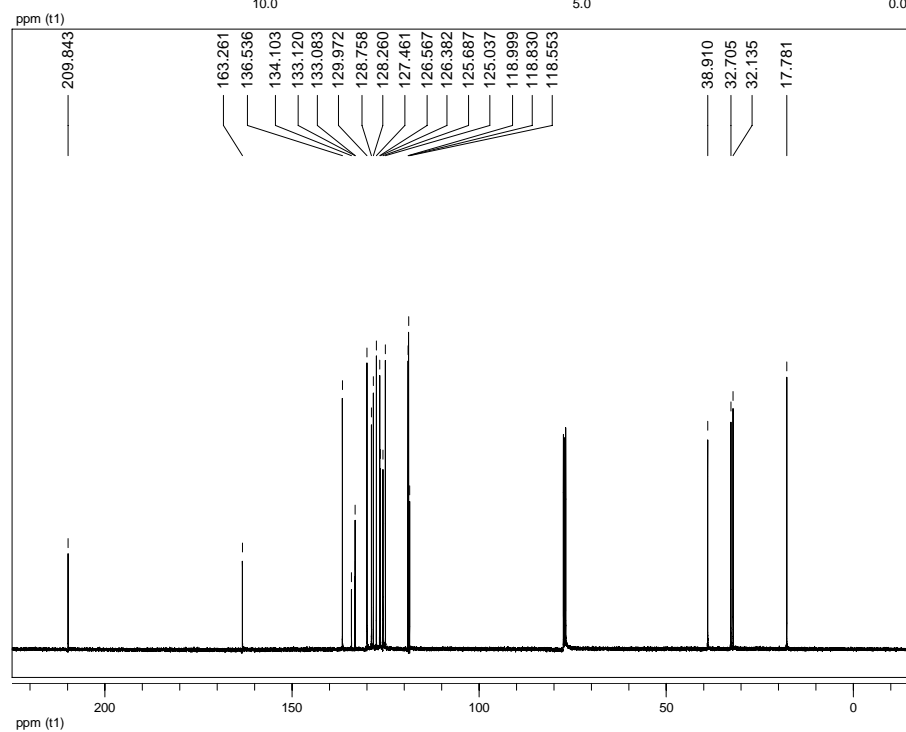

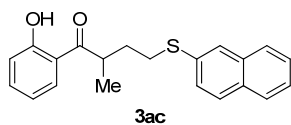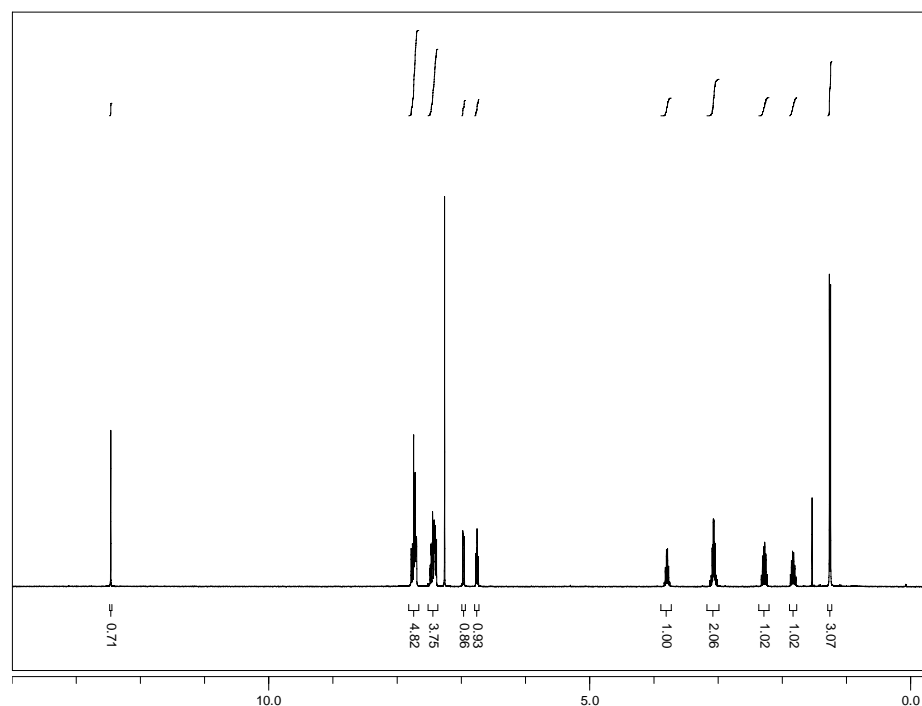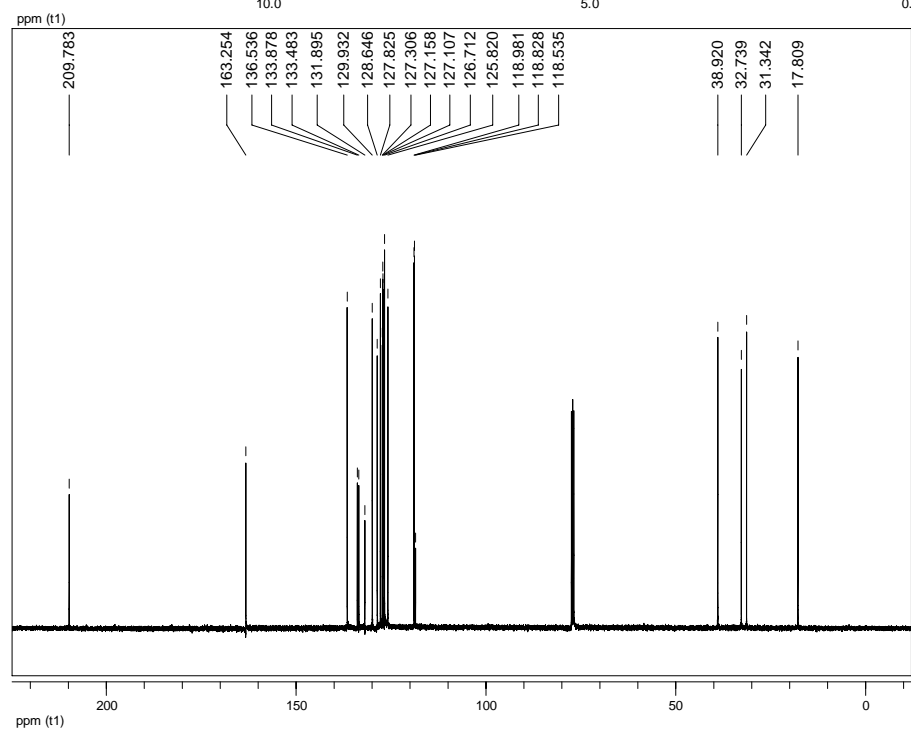

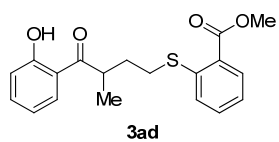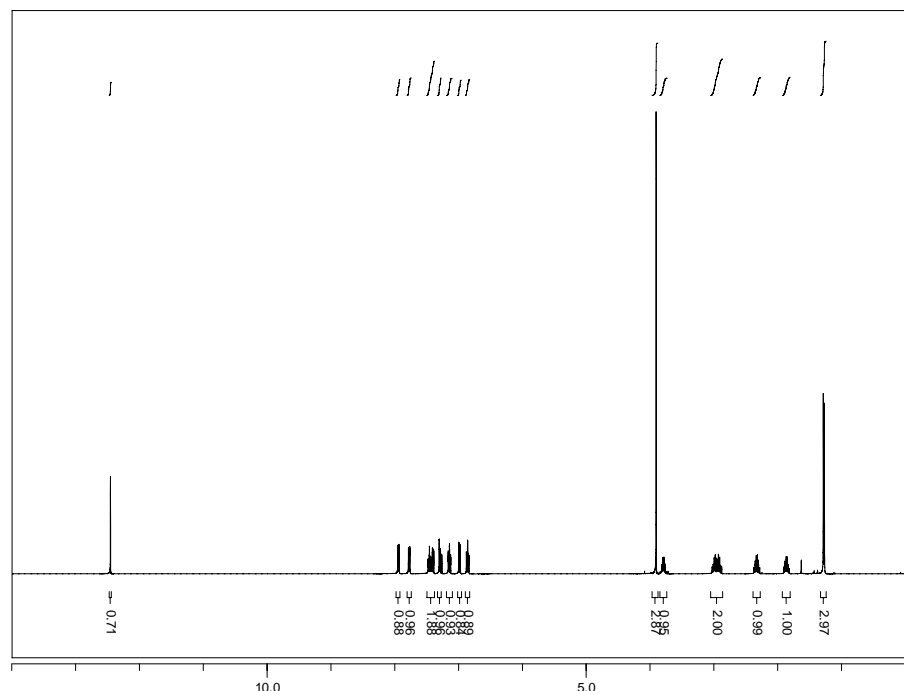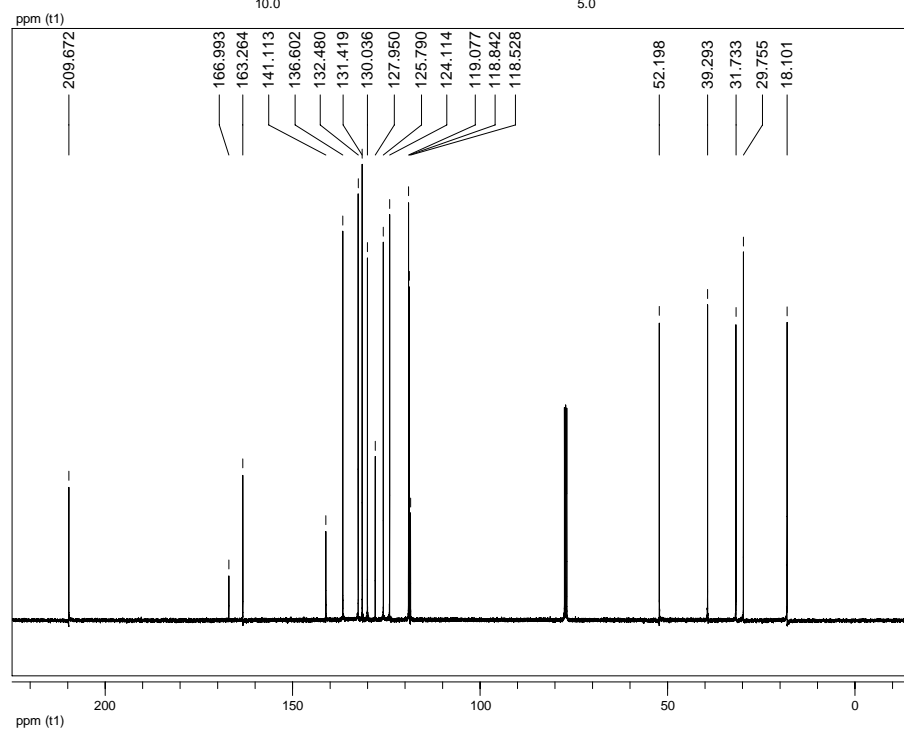

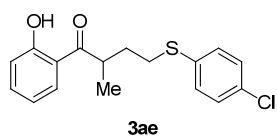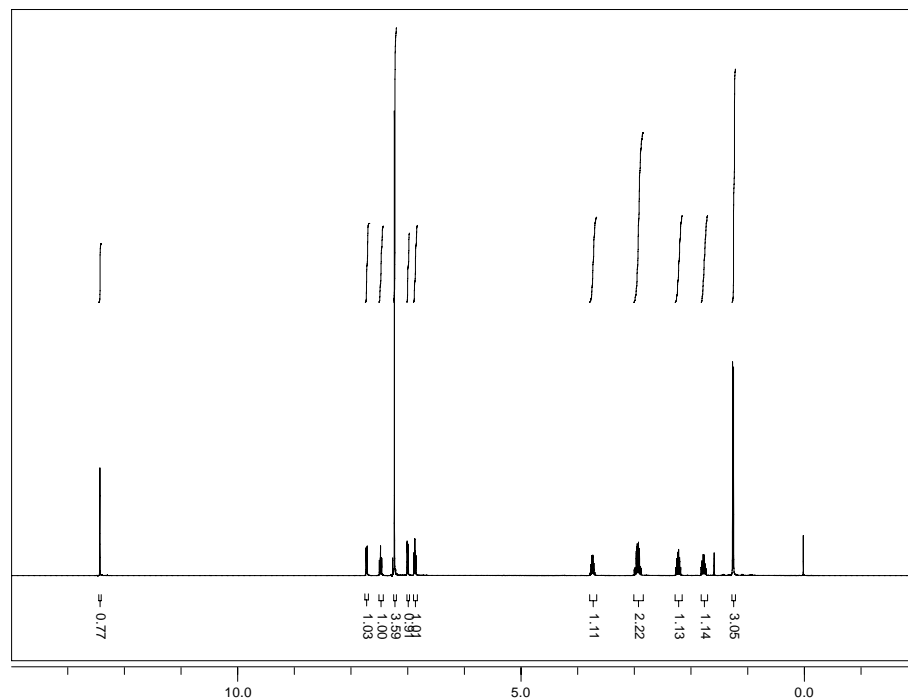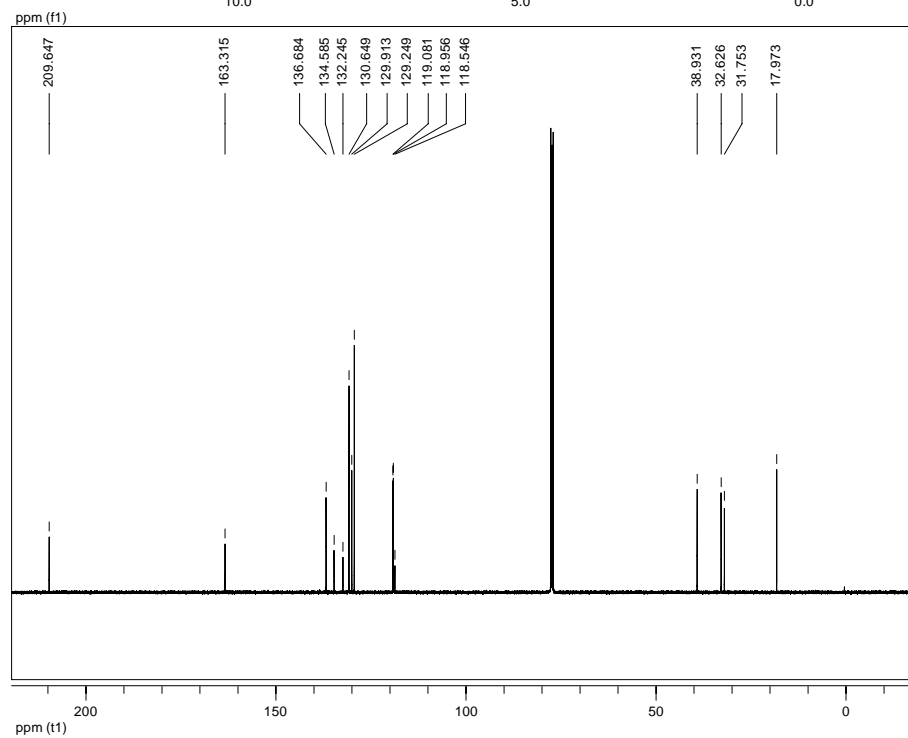

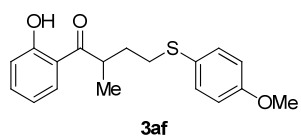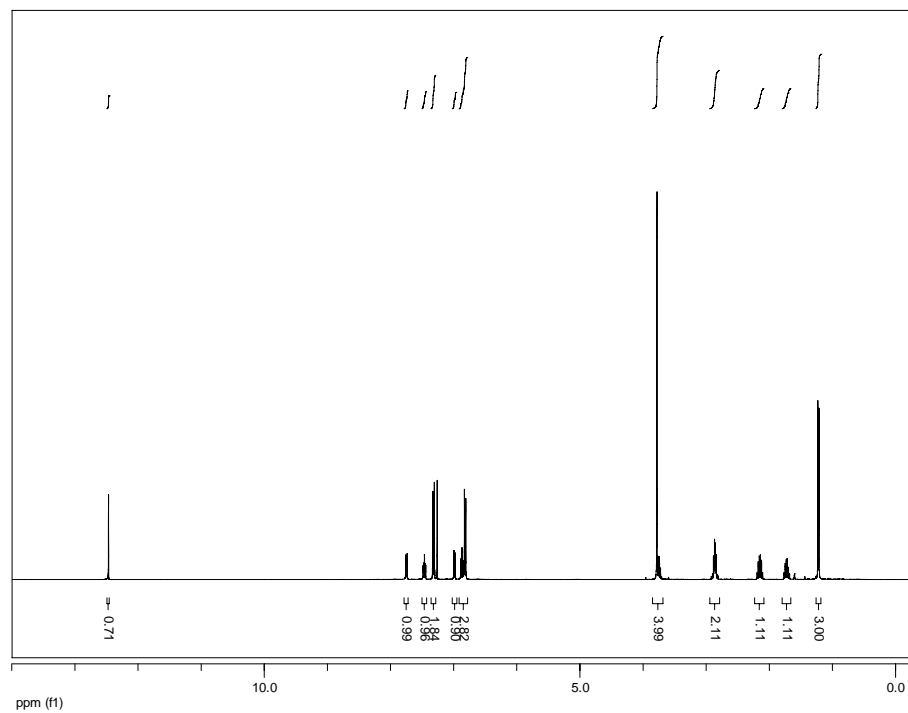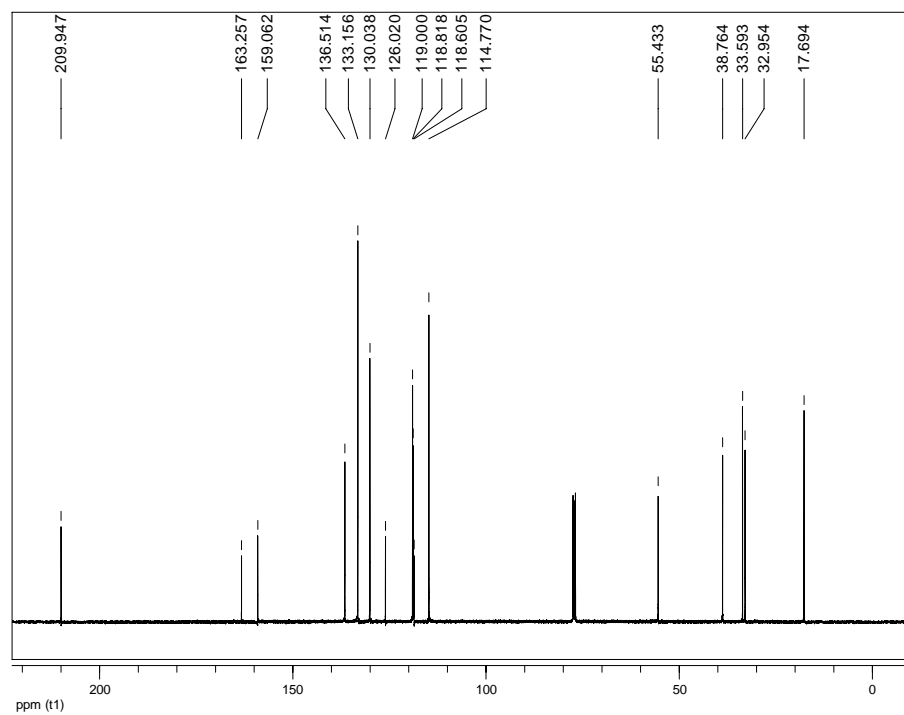

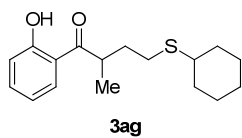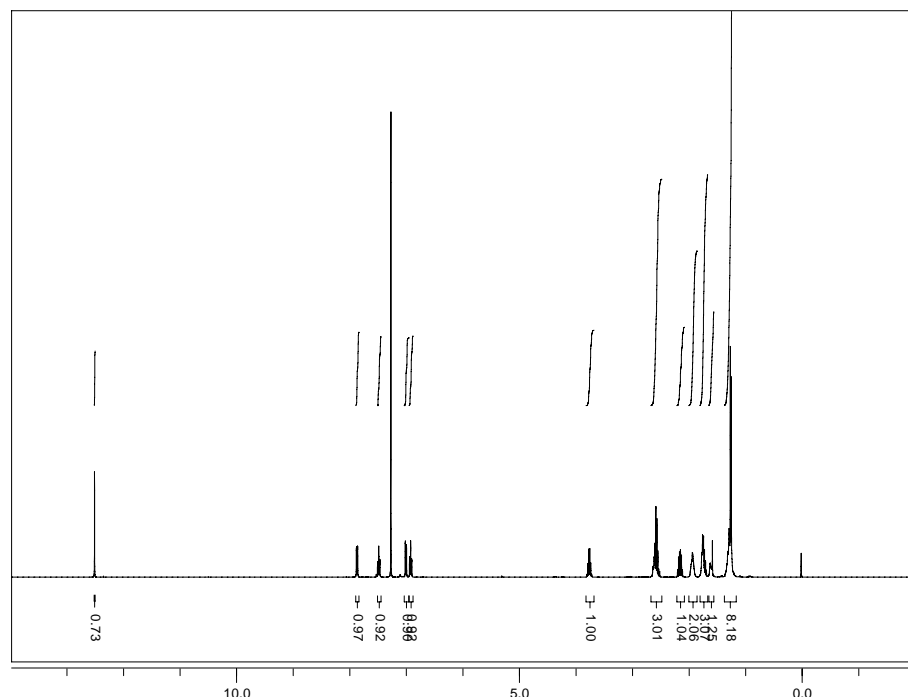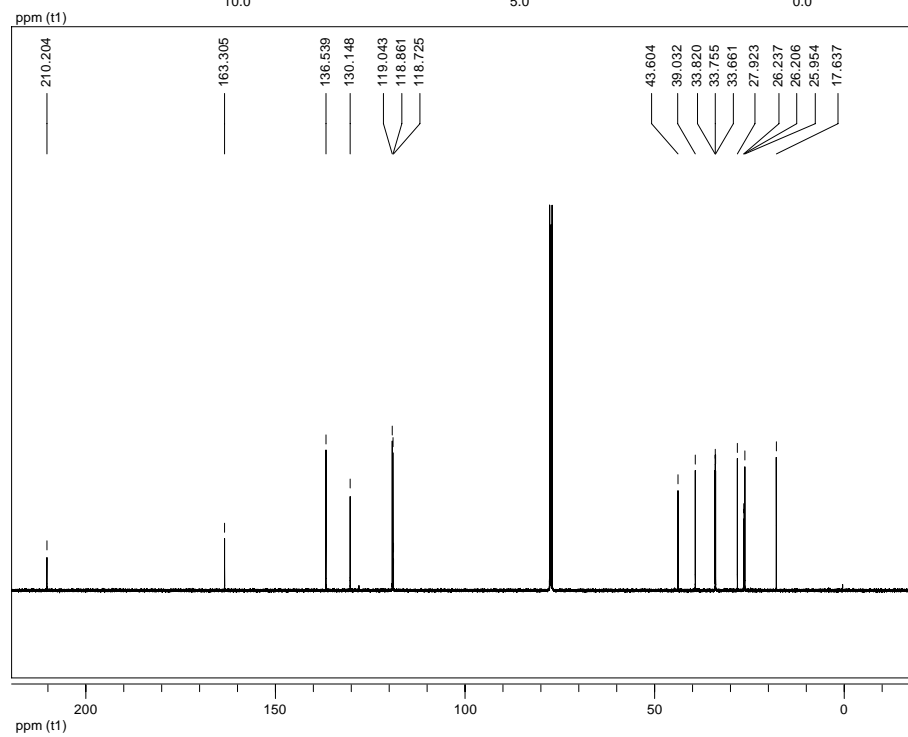



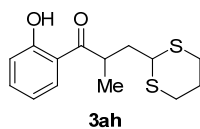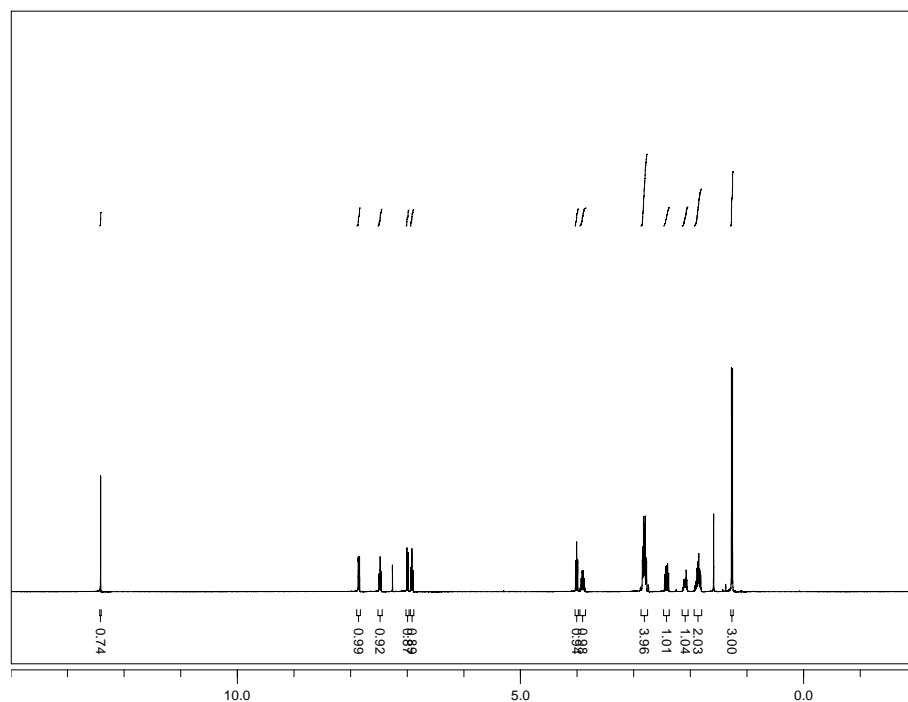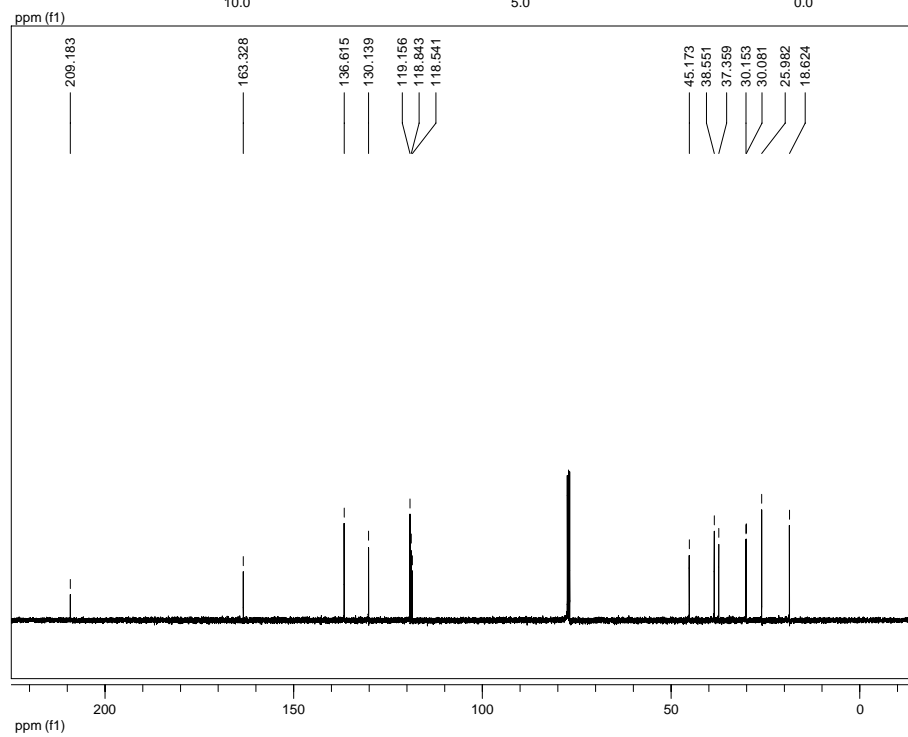

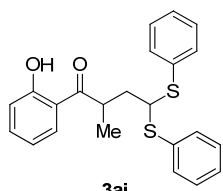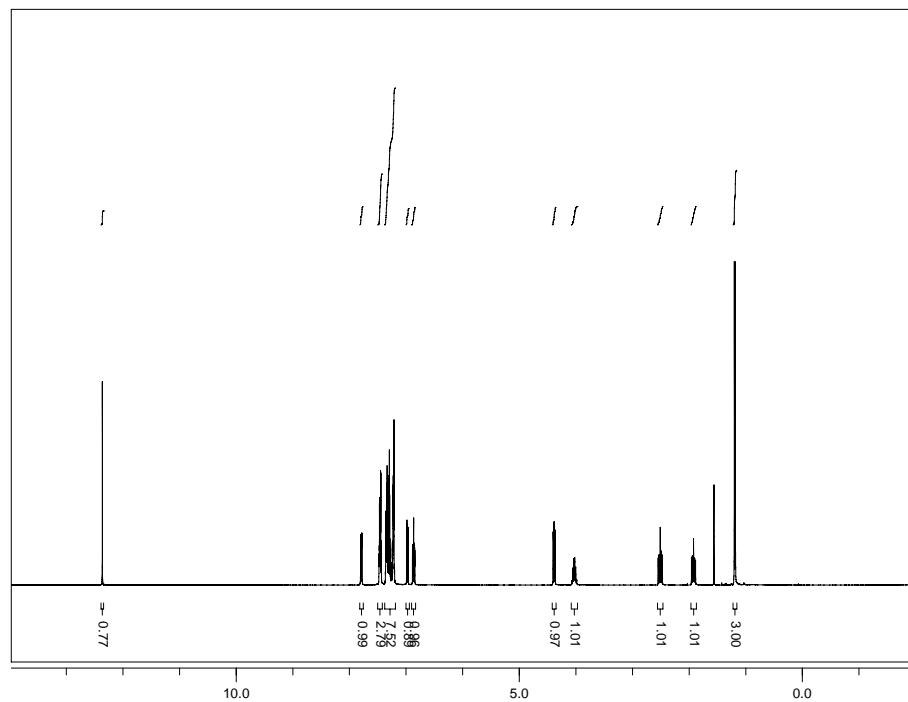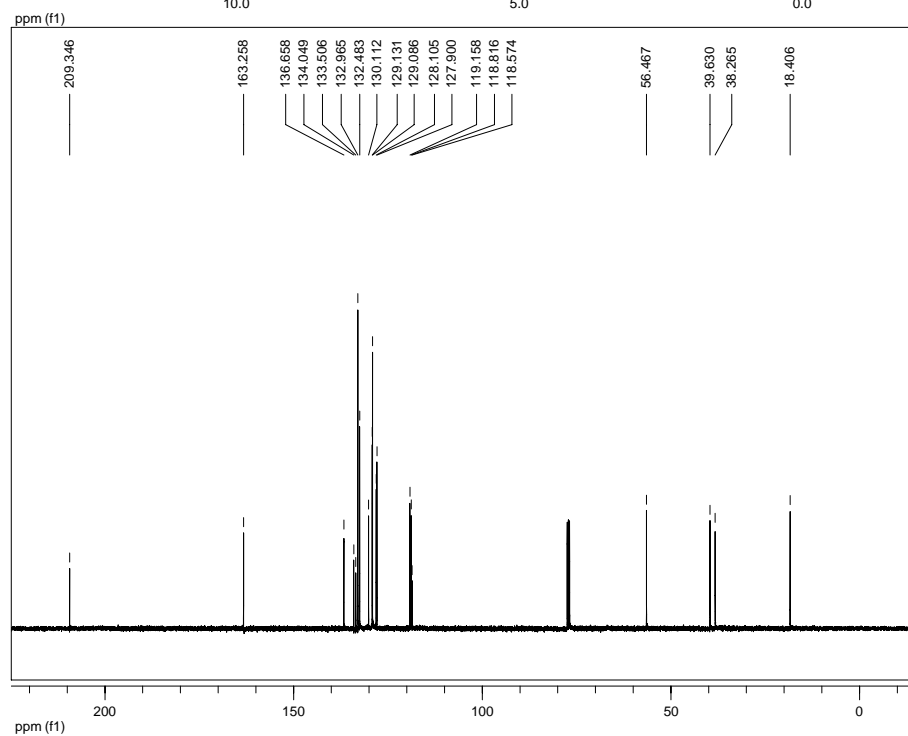

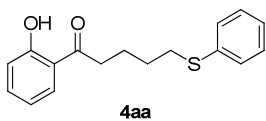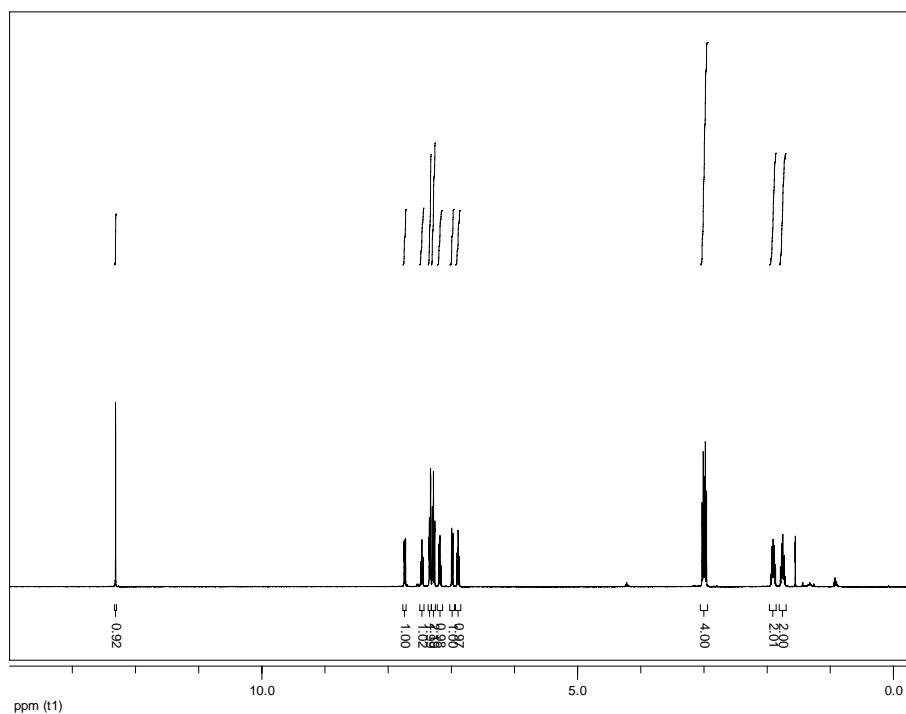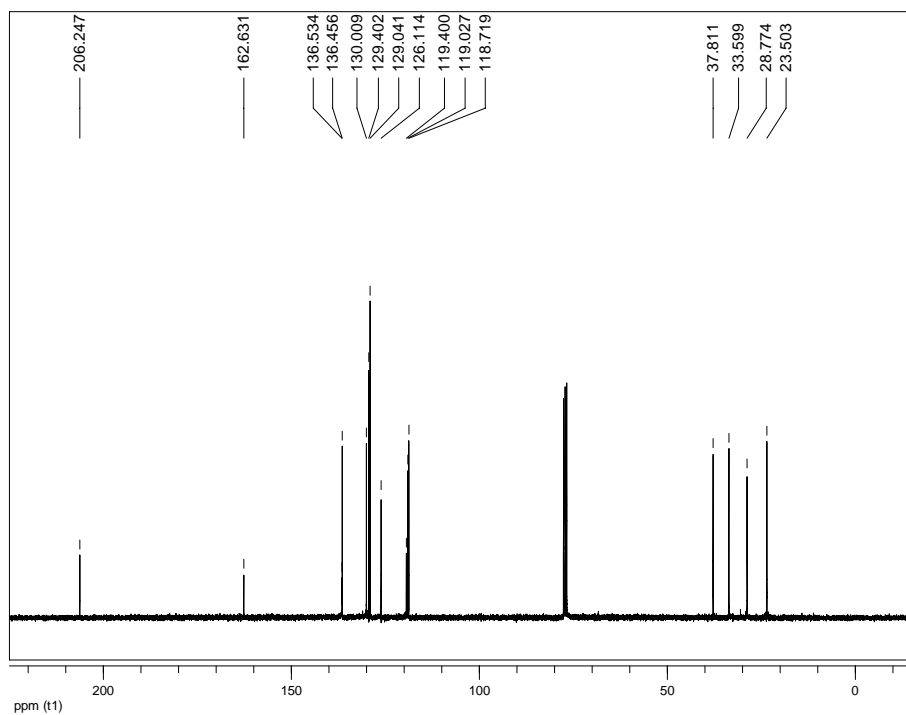

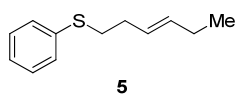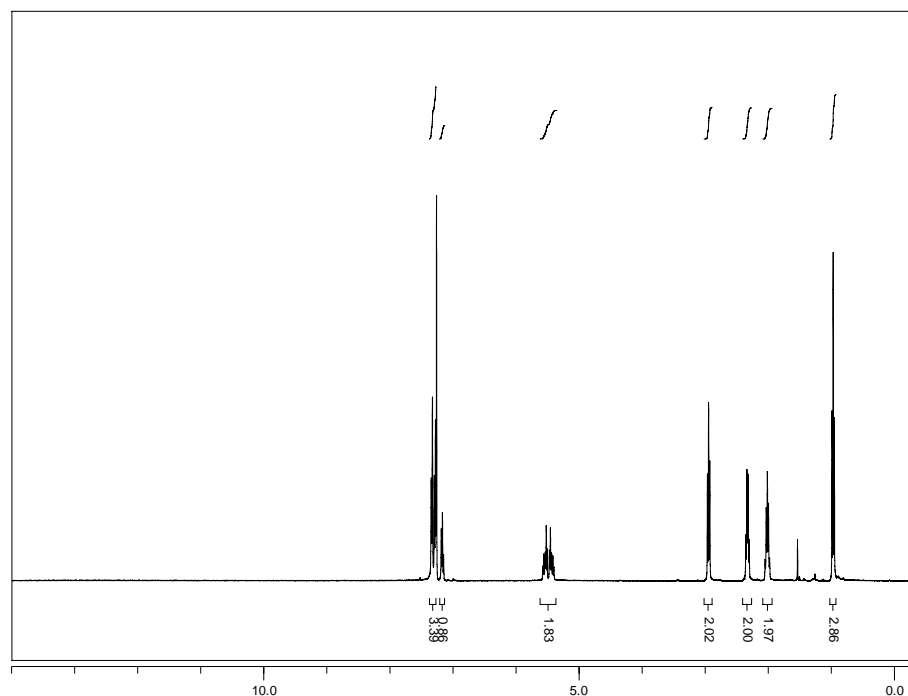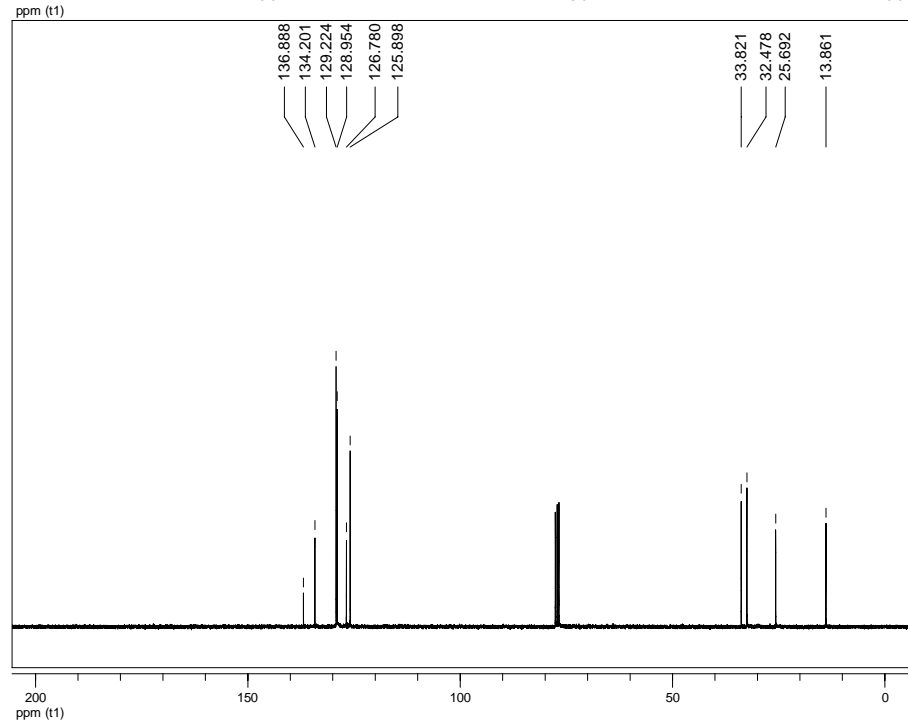

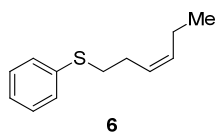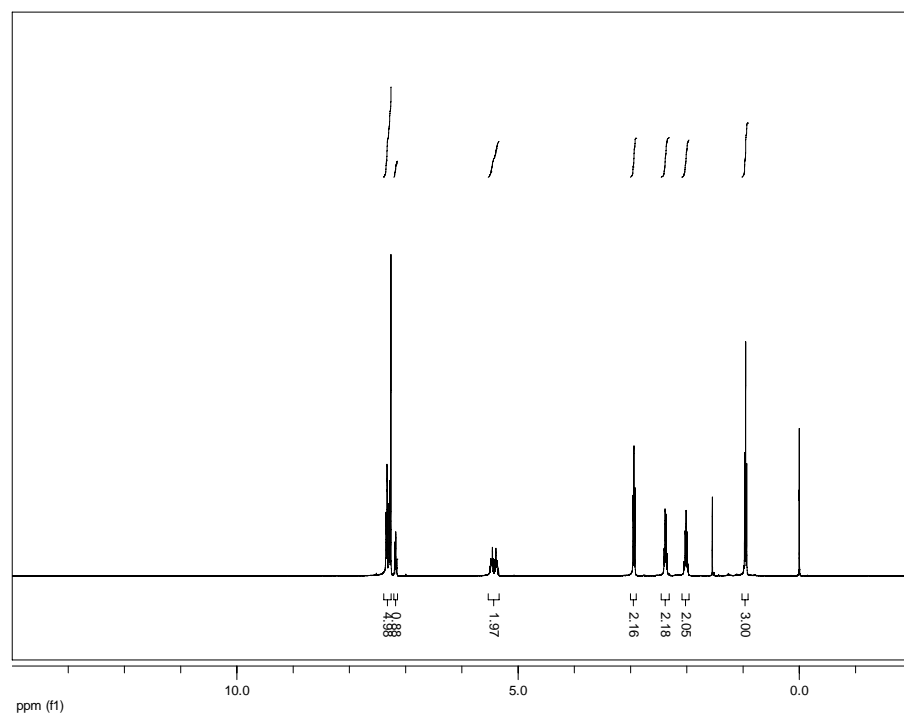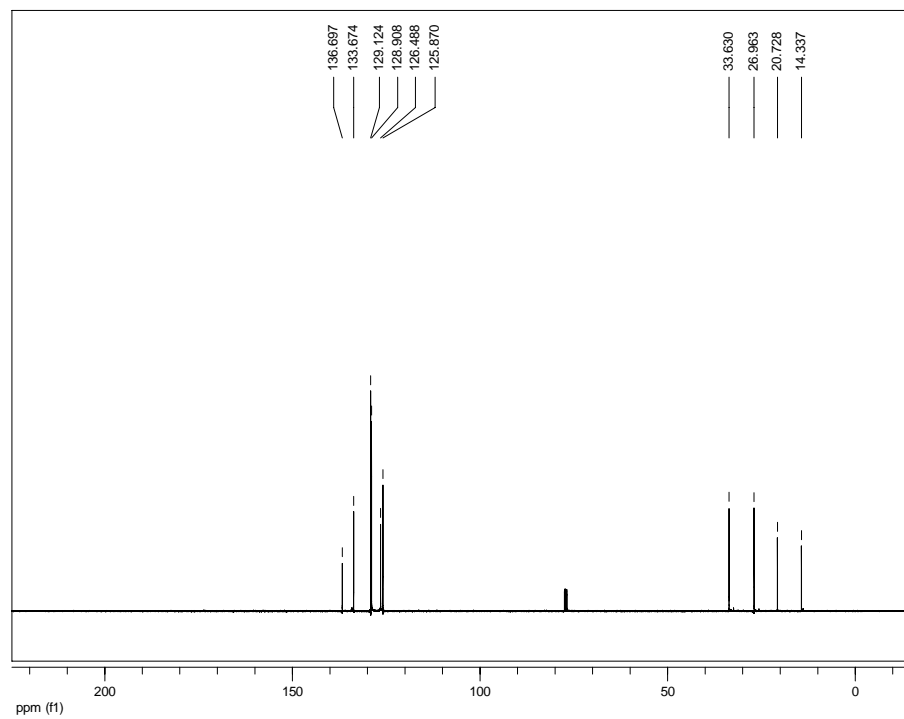

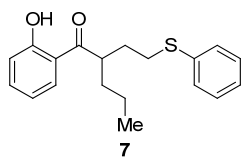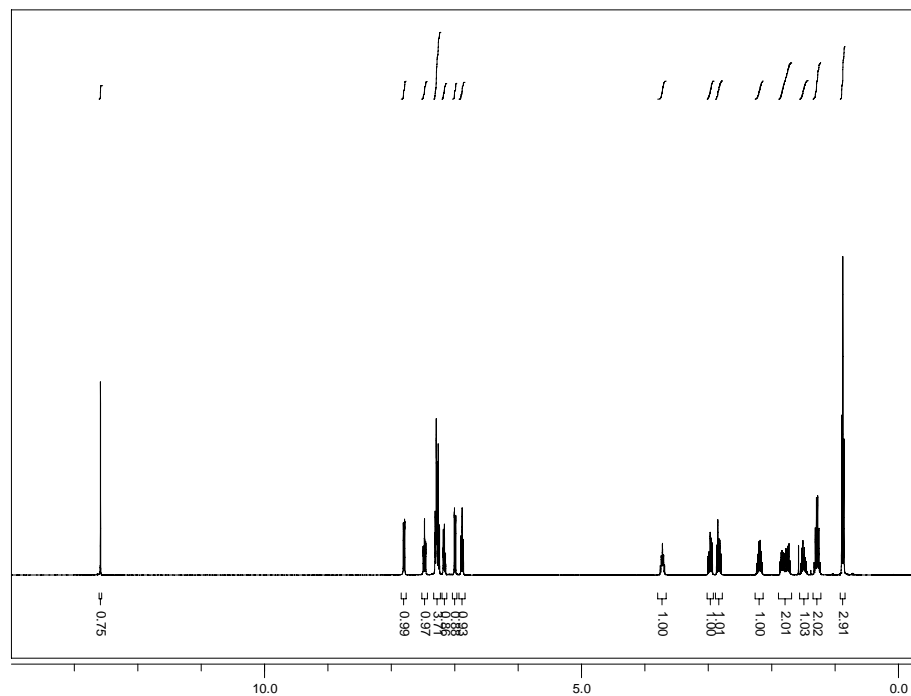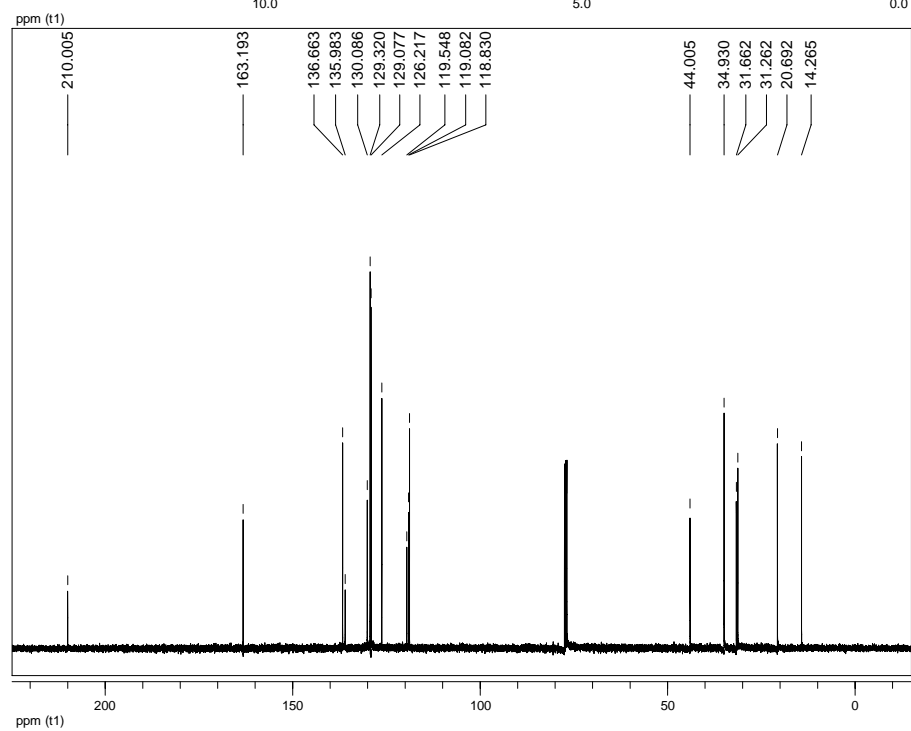

## COSY 7

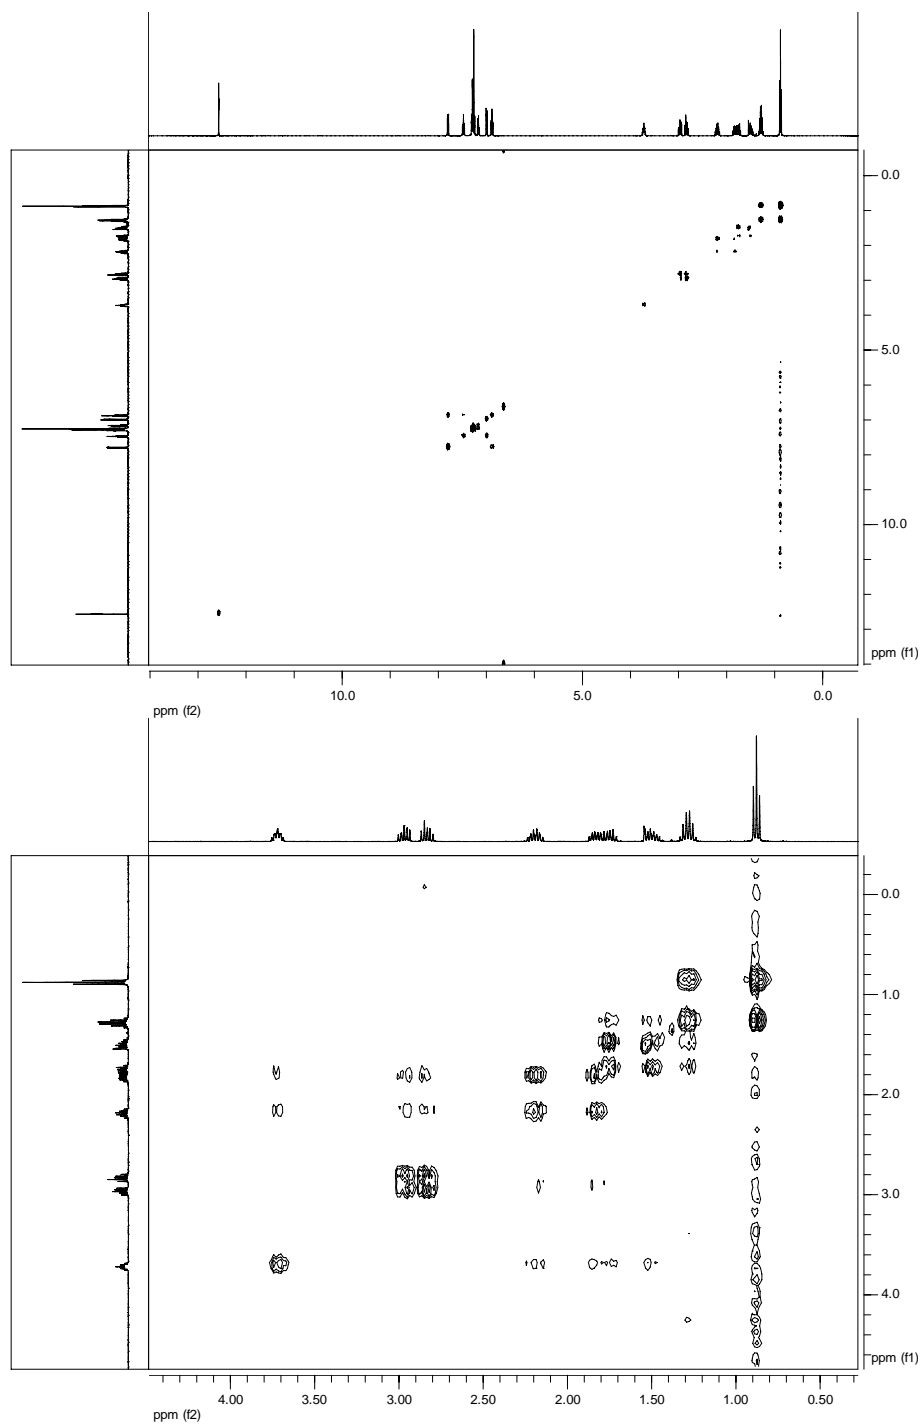

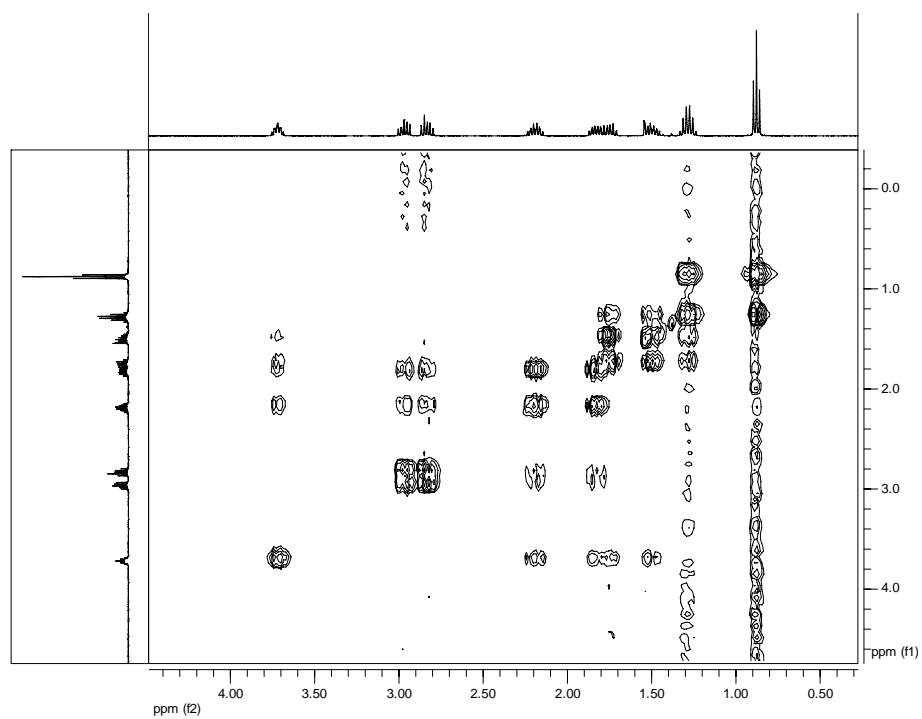



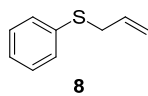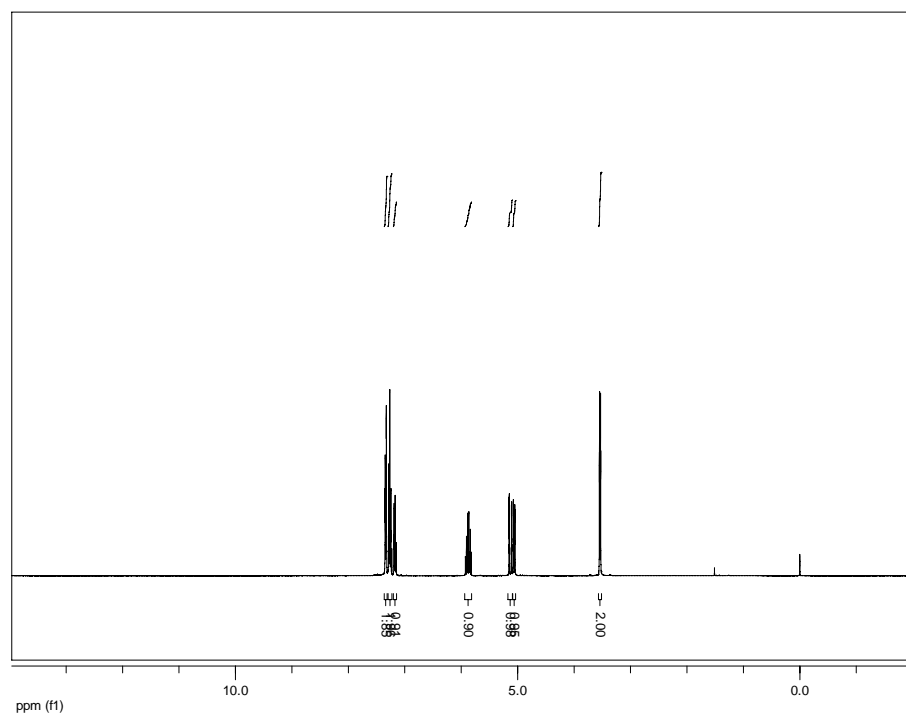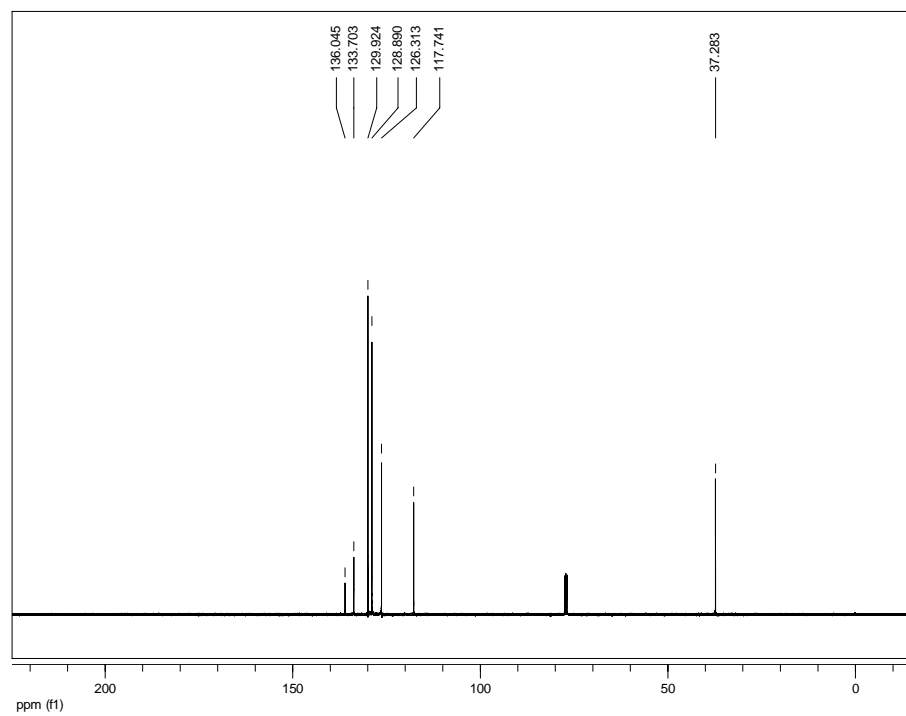

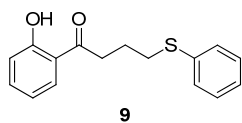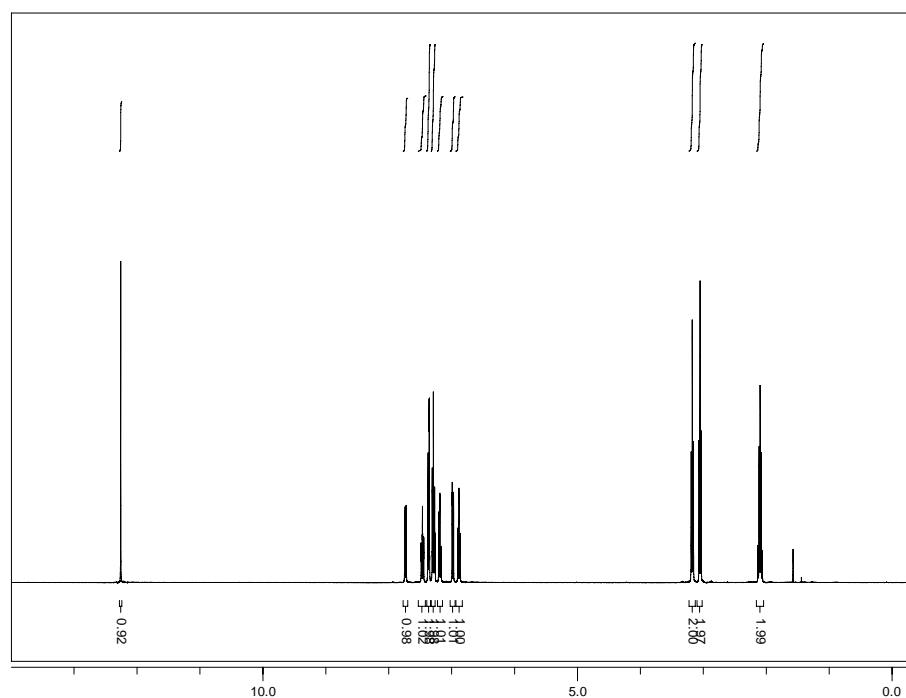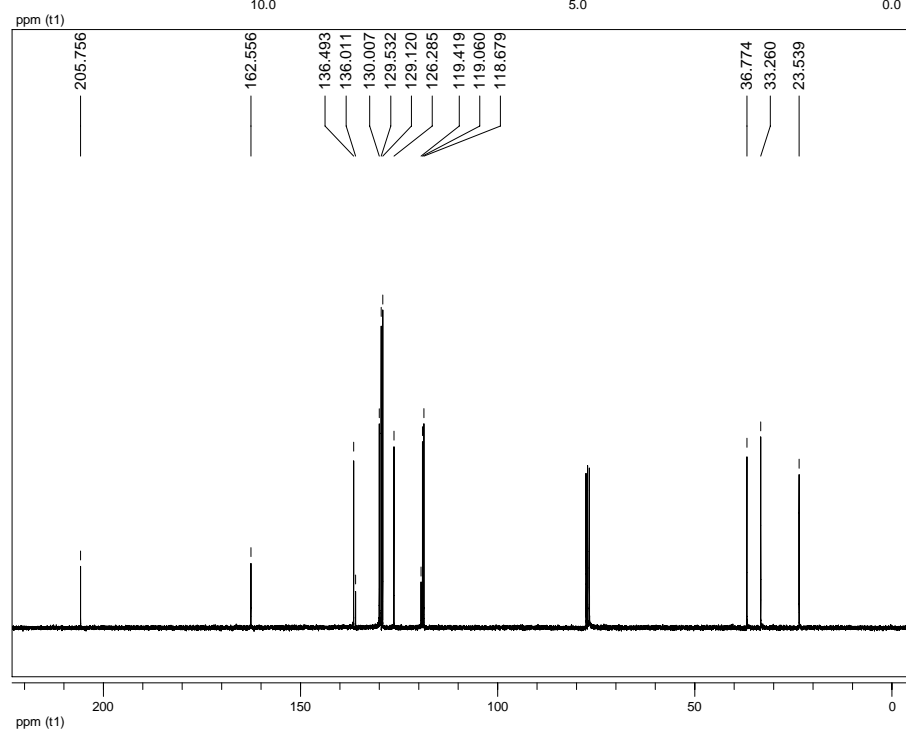

Supplement: Supplementary file 1 [file 4386199]
